# Supplementary material for: Effects of Wolbachia Infection and ovarian tumor Mutations on Sex-lethal Germline Functioning in Drosophila
Source: Oxford University Press journal article supplement (doi:10.1534/genetics.108.099374), 2009-01-27
Supplement: genetics.108.099374-1.pdf [file genetics.108.099374-1.pdf]

**Figure 1S. *Wolbachia*-induced gene expression differences as confirmed by qRT-PCR.** The average log<sub>2</sub> ratios (Infected/Uninfected) are plotted with standard errors indicated. Wildtype Canton-S pre-vitellogenic ovary samples from three independent dissection sets were assayed: dissection 1 (gray bars), dissection 2 (hatched bars), and dissection 3 (dotted bars). Results are shown for products of the female germline genes *ovo*, *piwi*, *fl(2)d*; defense genes *emp*, *InR*, *srp*; and cytoskeleton genes *Act5C*, *Mhc*, *Nup154*. Values were normalized against the internal control *rp49*.

Figure 1S

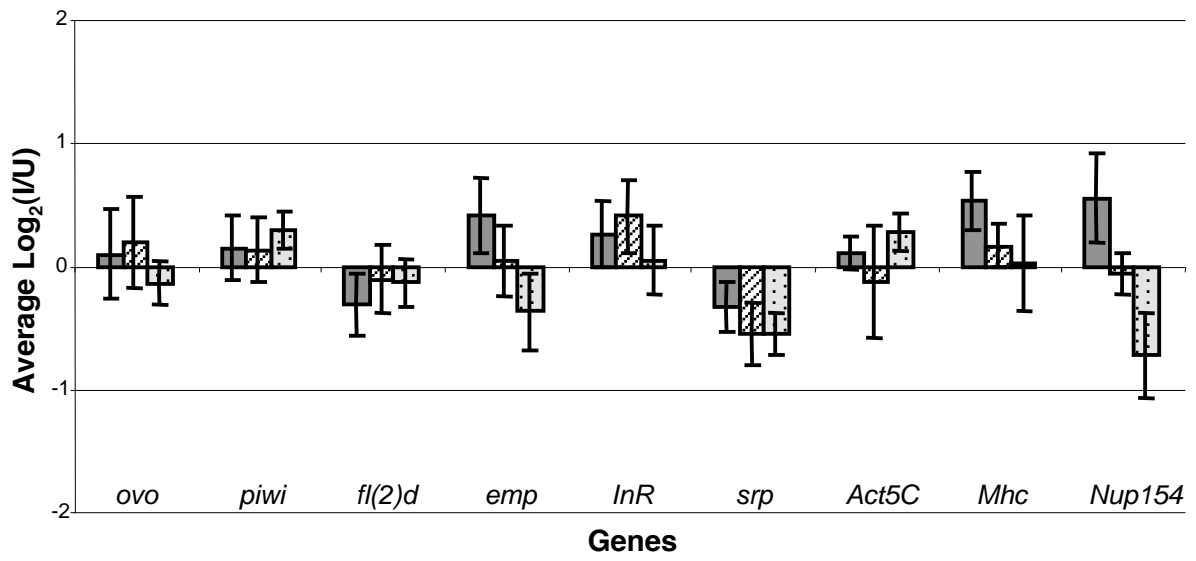

**Table 1S.** qRT-PCR primer sequences

| <b>Pimer pairs</b> | <b>Nucteotide Sequences (5'-3')</b> |
|--------------------|-------------------------------------|
| rp49_F             | GACGCTTCAAGGGACAGTATCTG             |
| rp49_R             | AAACGCGGTTCTGCATGAG                 |
| Act5C_F            | TCAGCCAGCAGTCGTCTAATCCAG            |
| Act5C_R            | AGCATCGTCTCCGGCAAATCC               |
| Yp1_F              | CATTGAAGCCGTCGCAGTGG                |
| Yp1_R              | CATTGGGCTTGGGCACATAGACC             |
| Yp2_F              | AAGTCGAGGAGCTGCCCAACC               |
| Yp2_R              | TGTAATCGGGCTTGAAGACATGG             |
| Yp3_F              | TACGACTACACCAGCAGCGAG               |
| Yp3_R              | TTGGTCAGGGTGGAGCCGAG                |
| ovo_F              | CATAGCGTTCAGCACCAGTATGCC            |
| ovo_R              | AGTGCCGCTTGTCTAGAAC                 |
| piwi_F             | ACTGGAATTATGTGAGAGCAATGG            |
| piwi_R             | GGTTCTTGGTCGTTTTAAGGGTCAC           |
| fl(2)d_F           | CAAGATGACCTCCAACGGCAGAC             |
| fl(2)d_R           | TCAACTGGGCGTTCTCCTTCTC              |
| emp_F              | AGTGGGTTTTCGCCGATGTGG               |
| emp_R              | TACCTTCTACTTGCCTCCTCAGGC            |
| lnR_F              | AGCCAATTCAATAGCGGGATACGG            |
| lnR_R              | AGGTAACAGACATAGCCGAACAGG            |
| srp_F              | AACTGCCACACCACCCACAC                |
| srp_R              | TGGACTTCTCGCTCTTCGTTCC              |
| Mhc_F              | ATTCGGCAAGGCTCAGCAGG                |
| Mhc_R              | TGGAATCTTGGTGGGAAGGC                |
| Nup154_F           | TGGTGCGTGCTGTTATGTGTATGC            |
| Nup154_R           | TGATGCGAGCAGTTGAGTATGGAC            |

**Table 2S.** The average log<sub>2</sub> ratios (infected/uninfected) in increasing order with the standard errors in the adjacent column. *Yp2*, *Vm32E*, and *Yp1* were the only genes that showed expression difference significantly larger than 1.5 fold (Lg2Ratio = ± 0.58). The differential expressions of *Yp1* and *Yp2* were confirmed by qRT-PCR. *Vm32E* expression difference could not be verified due to its single small exon that was difficult for an unambiguous amplification by qRT-PCR.

| Gene Name                 | Probe ID  | AveLg2Ratio | St Error |
|---------------------------|-----------|-------------|----------|
| Yp2 == FBgn0005391        | INC012E11 | -1.03       | 0.32     |
| Vm32E == FBgn0014076      | INC112D08 | -0.79       | 0.18     |
| Yp1 == FBgn0004045        | INC017E05 | -0.77       | 0.18     |
| CG18445 == FBgn0033476    | INC093H12 | -0.59       | 0.32     |
| CG3960 == FBgn0029876     | INC118B07 | -0.50       | 0.15     |
| CG7692 == FBgn0036714     | INC074F06 | -0.48       | 0.22     |
| Vm26Ab == FBgn0003980     | INC111C02 | -0.46       | 0.17     |
| Eap == FBgn0035063        | INC064H12 | -0.43       | 0.53     |
| CG15618 == FBgn0031077    | INC041A05 | -0.39       | 0.13     |
| Hrb27C == FBgn0004838     | INC071F02 | -0.37       | 0.28     |
| Vha16 == FBgn0004145      | INC085G06 | -0.35       | 0.07     |
| CG4991 == FBgn0030817     | INC084G08 | -0.35       | 0.26     |
| Vha16 == FBgn0004145      | INC073A07 | -0.34       | 0.16     |
| CG32774 == FBgn0052774    | INC156D07 | -0.32       | 0.32     |
| CG4098 == FBgn0036648     | INC009C11 | -0.32       | 0.26     |
| CG13856 == FBgn0038959    | INC095E06 | -0.32       | 0.27     |
| CG11674 == FBgn0030551    | INC054E04 | -0.32       | 0.17     |
| CG14368 == FBgn0038162    | INC158E03 | -0.30       | 0.19     |
| CG15160 == FBgn0032688    | INC001C07 | -0.30       | 0.29     |
| ovo == FBgn0003028        | INC101C11 | -0.30       | 0.17     |
| CG8007 == FBgn0037600     | INC021G01 | -0.30       | 0.30     |
| CG17186 == FBgn0038741    | INC048F11 | -0.29       | 0.19     |
| CT12497                   | INC124G06 | -0.29       | 0.39     |
| sqd == FBgn0003498        | INC132G12 | -0.29       | 0.17     |
| CG31232 == FBgn0051232    | INC149C05 | -0.29       | 0.38     |
| Hrb27C == FBgn0004838     | INC067B06 | -0.29       | 0.22     |
| CG10970 == FBgn0030078    | INC074E07 | -0.28       | 0.10     |
| CG12904 == FBgn0033510    | INC015D06 | -0.28       | 0.24     |
| CG1545 == FBgn0030259     | INC149H11 | -0.28       | 0.43     |
| insc == FBgn0011674       | INC081F09 | -0.27       | 0.11     |
| CG13047 == FBgn0036594    | INC027H05 | -0.27       | 0.30     |
| rho == FBgn0004635        | INC071G08 | -0.26       | 0.14     |
| alpha-Est1 == FBgn0015568 | INC072E10 | -0.26       | 0.17     |
| CG18543 == FBgn0010431    | INC005A11 | -0.26       | 0.17     |
| CG14446 == FBgn0029850    | INC036C01 | -0.26       | 0.39     |
| CG10265 == FBgn0033990    | INC089G12 | -0.26       | 0.25     |
| kuz == FBgn0015954        | INC006F12 | -0.26       | 0.50     |
| dhd == FBgn0011761        | INC018C04 | -0.25       | 0.23     |
| CG16800 == FBgn0032462    | INC016F07 | -0.25       | 0.17     |
| CG15316 == FBgn0030133    | INC108F12 | -0.25       | 0.09     |
| CG9374 == FBgn0038167     | INC156G04 | -0.25       | 0.10     |
| CG30158 == FBgn0050158    | INC153E07 | -0.25       | 0.08     |
| CG15159 == FBgn0032687    | INC106B03 | -0.24       | 0.19     |
| CG4756 == FBgn0030788     | INC038H12 | -0.24       | 0.15     |
| CG8816 == FBgn0033754     | INC158C09 | -0.24       | 0.20     |
| Traf2 == FBgn0026318      | INC074A05 | -0.24       | 0.30     |
| CG8479 == FBgn0033914     | INC101B12 | -0.24       | 0.33     |
| CG14087 == FBgn0036868    | INC041B12 | -0.23       | 0.15     |
| CG10311 == FBgn0038420    | INC152B11 | -0.23       | 0.04     |
| CG12063 == FBgn0039851    | INC036A08 | -0.23       | 0.11     |
| CG6372 == FBgn0035915     | INC151B08 | -0.23       | 0.21     |
| DnaJ-60 == FBgn0020129    | INC106D03 | -0.23       | 0.29     |
| robl == FBgn0024196       | INC107E10 | -0.23       | 0.23     |

## Table2S\_Sun\_Cline

|                                 |           |       |      |
|---------------------------------|-----------|-------|------|
| CG9302 == FBgn0032514           | INC107D08 | -0.23 | 0.26 |
| CG31640 == FBgn0051640          | INC025C07 | -0.23 | 0.22 |
| PP2A-B' == FBgn0042693          | INC032E07 | -0.22 | 0.60 |
| CG7291 == FBgn0031381           | INC037A06 | -0.22 | 0.27 |
| VhaSFD == FBgn0027779           | INC008E06 | -0.22 | 0.08 |
| CG30419 == FBgn0050419          | INC041C11 | -0.22 | 0.34 |
| CG14270 == FBgn0029665          | INC012B10 | -0.22 | 0.30 |
| Proct == FBgn0045038            | INC137H10 | -0.22 | 0.11 |
| rost == FBgn0011705             | INC098E08 | -0.22 | 0.20 |
| Appl == FBgn0000108             | INC044E12 | -0.22 | 0.10 |
| mnbl == FBgn0002777             | INC084C01 | -0.22 | 0.10 |
| CG31163 == FBgn0051163          | INC122E01 | -0.22 | 0.26 |
| BEST:LD14959 == FBgn0026577     | INC013H11 | -0.22 | 0.22 |
| CG7823 == FBgn0036921           | INC151D04 | -0.22 | 0.16 |
| CG7251 == FBgn0031723           | INC033D06 | -0.22 | 0.14 |
| CG11738 == FBgn0031105          | INC033G12 | -0.22 | 0.21 |
| CG2021 == FBgn0035271           | INC151D06 | -0.22 | 0.19 |
| hugl == FBgn0028374             | INC017G03 | -0.21 | 0.38 |
| CG9354 == FBgn0037686           | INC100H06 | -0.21 | 0.41 |
| NADH dehydrogenase subunit 5    | INC153A05 | -0.21 | 0.25 |
| oc == FBgn0004102               | INC045A01 | -0.21 | 0.44 |
| BG:DS00797.1 == FBgn0028541     | INC021H10 | -0.21 | 0.48 |
| Gip == FBgn0011770              | INC037B03 | -0.21 | 0.12 |
| CG9882 == FBgn0034817           | INC156C12 | -0.21 | 0.32 |
| CG32532 == FBgn0052532          | INC008C08 | -0.21 | 0.14 |
| Gef64C == FBgn0035574           | INC087C12 | -0.21 | 0.33 |
| AP-50 == FBgn0024832            | INC009E02 | -0.21 | 0.39 |
| RhoGAP18B == FBgn0030986        | INC033C04 | -0.21 | 0.33 |
| l(3)10418 == FBgn0010940        | INC146A11 | -0.20 | 0.22 |
| fne == FBgn0040222              | INC152H04 | -0.20 | 0.12 |
| guf == FBgn0014184              | INC147D05 | -0.20 | 0.22 |
| p38b == FBgn0024846             | INC074G10 | -0.20 | 0.12 |
| CG9926 == FBgn0038190           | INC081A05 | -0.20 | 0.25 |
| Orct == FBgn0019952             | INC048C02 | -0.20 | 0.24 |
| TfIIA-L == FBgn0011289          | INC120F08 | -0.20 | 0.26 |
| cytochrome c oxidase subunit II | INC153A08 | -0.20 | 0.19 |
| CG32406 == FBgn0052406          | INC038H10 | -0.20 | 0.25 |
| CG6712 == FBgn0032408           | INC011E10 | -0.20 | 0.35 |
| CG18190 == FBgn0034403          | INC086E05 | -0.20 | 0.17 |
| Cry == FBgn0005664              | INC040G03 | -0.20 | 0.28 |
| CG32264 == FBgn0052264          | INC036D12 | -0.20 | 0.26 |
| CG32549 == FBgn0052549          | INC067E08 | -0.20 | 0.20 |
| CG31475 == FBgn0051475          | INC009G04 | -0.19 | 0.13 |
| CG7185 == FBgn0035872           | INC153C09 | -0.19 | 0.12 |
| Hira == FBgn0022786             | INC028E08 | -0.19 | 0.20 |
| CG17205 == FBgn0038794          | INC026H11 | -0.19 | 0.11 |
| Pp2B-14D == FBgn0011826         | INC023E11 | -0.19 | 0.21 |
| CG14952 == FBgn0035377          | INC110B12 | -0.19 | 0.13 |
| sar1 == FBgn0038947             | INC113D04 | -0.19 | 0.20 |
| CG11370 == FBgn0037181          | INC085G12 | -0.19 | 0.17 |
| CG13210 == FBgn0033612          | INC115A02 | -0.19 | 0.07 |
| CG5261 == FBgn0031912           | INC119F01 | -0.19 | 0.23 |
| CG12907 == FBgn0033511          | INC068H06 | -0.19 | 0.30 |
| Vang == FBgn0015838             | INC071D12 | -0.19 | 0.18 |
| CG5558 == FBgn0038684           | INC038F09 | -0.19 | 0.19 |
| CG4360 == FBgn0038787           | INC009A08 | -0.19 | 0.06 |
| CG10660 == FBgn0036288          | INC024H08 | -0.19 | 0.11 |
| CG32701 == FBgn0052701          | INC154E12 | -0.19 | 0.11 |
| HmgZ == FBgn0010228             | INC037C08 | -0.19 | 0.14 |
| Hsc70-4 == FBgn0001219          | INC039G03 | -0.19 | 0.24 |
| CG6885 == FBgn0036810           | INC042C05 | -0.19 | 0.32 |
| GstD9 == FBgn0038020            | INC062F04 | -0.18 | 0.22 |
| EG:63B12.13 == FBgn0026873      | INC152C01 | -0.18 | 0.23 |

## Table2S\_Sun\_Cline

|                               |           |       |      |
|-------------------------------|-----------|-------|------|
| Gpdh == FBgn0001128           | INC054D04 | -0.18 | 0.15 |
| CG8635 == FBgn0033317         | INC008H04 | -0.18 | 0.32 |
| CG11200 == FBgn0034500        | INC120B06 | -0.18 | 0.13 |
| CG17327 == FBgn0038107        | INC075G05 | -0.18 | 0.34 |
| CG6216 == FBgn0036139         | INC017G05 | -0.18 | 0.31 |
| cytochrome b                  | INC153A01 | -0.18 | 0.13 |
| CG18347 == FBgn0037969        | INC005E02 | -0.18 | 0.25 |
| CG14036 == FBgn0031677        | INC122A05 | -0.18 | 0.15 |
| CG1967 == FBgn0030341         | INC074D08 | -0.18 | 0.23 |
| CG1259 == FBgn0035513         | INC026B03 | -0.18 | 0.31 |
| CG8327 == FBgn0037723         | INC074F11 | -0.18 | 0.17 |
| dnc == FBgn0000479            | INC030E04 | -0.18 | 0.33 |
| RnpS1 == FBgn0037707          | INC042F10 | -0.18 | 0.28 |
| Mst84Db == FBgn0004173        | INC132C01 | -0.18 | 0.19 |
| Vm34Ca == FBgn0003983         | INC106H03 | -0.18 | 0.15 |
| dalao == FBgn0030093          | INC017H02 | -0.17 | 0.20 |
| CG17856 == FBgn0039576        | INC111D07 | -0.17 | 0.13 |
| CG32130 == FBgn0052130        | INC006G07 | -0.17 | 0.22 |
| CG13545 == FBgn0034828        | INC002B11 | -0.17 | 0.23 |
| CG32789 == FBgn0052789        | INC154D11 | -0.17 | 0.14 |
| Rab14 == FBgn0015791          | INC093C12 | -0.17 | 0.25 |
| CG40278 == FBgn0058278        | INC141B12 | -0.17 | 0.14 |
| BG:DS09217.1 == FBgn0028508   | INC119B08 | -0.17 | 0.27 |
| CG4798 == FBgn0034213         | INC156C10 | -0.17 | 0.14 |
| CG5112 == FBgn0039341         | INC067F02 | -0.17 | 0.16 |
| Samuel == FBgn0032330         | INC014F04 | -0.17 | 0.15 |
| CG2221 == FBgn0030194         | INC084A01 | -0.17 | 0.13 |
| CG7252 == FBgn0036226         | INC154G02 | -0.17 | 0.18 |
| lap2 == FBgn0015247           | INC056E11 | -0.17 | 0.24 |
| CG7188 == FBgn0035871         | INC029A06 | -0.17 | 0.37 |
| EG:140G11.3 == FBgn0028746    | INC048G06 | -0.17 | 0.34 |
| CG17440 == FBgn0030120        | INC110E01 | -0.17 | 0.10 |
| bin3 == FBgn0033073           | INC030H04 | -0.17 | 0.35 |
| CG5515 == FBgn0039163         | INC090D04 | -0.17 | 0.14 |
| CG17600 == FBgn0031195        | INC005C11 | -0.17 | 0.17 |
| CG15368 == FBgn0030104        | INC032B12 | -0.17 | 0.11 |
| CG18212 == FBgn0038535        | INC090A10 | -0.17 | 0.17 |
| NADH dehydrogenase subunit 4L | INC153A11 | -0.17 | 0.15 |
| CG5554 == FBgn0034914         | INC025G11 | -0.17 | 0.31 |
| CG10932 == FBgn0029969        | INC018B02 | -0.17 | 0.30 |
| CT33523                       | INC102G11 | -0.17 | 0.14 |
| CT21478                       | INC123D10 | -0.16 | 0.18 |
| CG4645 == FBgn0030435         | INC017F09 | -0.16 | 0.47 |
| CG13220 == FBgn0033608        | INC087F08 | -0.16 | 0.22 |
| CG2471 == FBgn0030357         | INC058G04 | -0.16 | 0.32 |
| CG5632 == FBgn0036263         | INC030A04 | -0.16 | 0.31 |
| RpL37a == FBgn0028696         | INC130H04 | -0.16 | 0.23 |
| CT32596                       | INC153B01 | -0.16 | 0.12 |
| CG7671 == FBgn0038609         | INC018C03 | -0.16 | 0.09 |
| Ddx1 == FBgn0015075           | INC120H02 | -0.16 | 0.07 |
| CG13194 == FBgn0033649        | INC087B11 | -0.16 | 0.34 |
| rgj == FBgn0003244            | INC111H06 | -0.16 | 0.20 |
| m2 == FBgn0002592             | INC044E06 | -0.16 | 0.15 |
| CG3931 == FBgn0034879         | INC130B06 | -0.16 | 0.06 |
| CG10470 == FBgn0032746        | INC018F06 | -0.16 | 0.19 |
| CG6615 == FBgn0036694         | INC158A06 | -0.16 | 0.11 |
| mRpS26 == FBgn0036774         | INC022B11 | -0.16 | 0.20 |
| CG8010 == FBgn0031008         | INC015F04 | -0.16 | 0.19 |
| Ptp4E == FBgn0004368          | INC024G12 | -0.16 | 0.32 |
| CG14237 == FBgn0039428        | INC108C02 | -0.16 | 0.16 |
| CG4860 == FBgn0037999         | INC026H01 | -0.16 | 0.10 |
| EG:131F2.2 == FBgn0024988     | INC021A03 | -0.16 | 0.12 |
| CG3760 == FBgn0022343         | INC067C05 | -0.16 | 0.20 |

## Table2S\_Sun\_Cline

|                                  |           |       |      |
|----------------------------------|-----------|-------|------|
| CG1970 == FBgn0039909            | INC074H10 | -0.16 | 0.23 |
| dll == FBgn0000462               | INC006F03 | -0.15 | 0.21 |
| ifc == FBgn0001941               | INC044E11 | -0.15 | 0.18 |
| CG12897 == FBgn0033517           | INC015D02 | -0.15 | 0.34 |
| CG14095 == FBgn0036870           | INC005G11 | -0.15 | 0.35 |
| Eip71CD == FBgn0000565           | INC151F04 | -0.15 | 0.15 |
| CG3902 == FBgn0036824            | INC003A04 | -0.15 | 0.29 |
| CG13672 == FBgn0035862           | INC151B07 | -0.15 | 0.25 |
| CG3800 == FBgn0034802            | INC117G08 | -0.15 | 0.15 |
| CG32130 == FBgn0052130           | INC156D04 | -0.15 | 0.25 |
| mRpL17 == FBgn0035122            | INC117E07 | -0.15 | 0.20 |
| GstD10 == FBgn0042206            | INC093E05 | -0.15 | 0.29 |
| cytochrome c oxidase subunit III | INC153A09 | -0.15 | 0.19 |
| Ahcy13 == FBgn0014455            | INC026D11 | -0.15 | 0.46 |
| Vha14 == FBgn0010426             | INC013F10 | -0.15 | 0.17 |
| CG5074 == FBgn0031311            | INC017G08 | -0.15 | 0.08 |
| CG17683 == FBgn0040002           | INC099C02 | -0.15 | 0.24 |
| MTA1-like == FBgn0027951         | INC153C11 | -0.15 | 0.27 |
| CT24124                          | INC073F09 | -0.15 | 0.33 |
| par-6 == FBgn0026192             | INC044D04 | -0.15 | 0.20 |
| SC35 == FBgn0040286              | INC143E07 | -0.15 | 0.11 |
| CG1988 == FBgn0037464            | INC084B06 | -0.15 | 0.28 |
| CG8128 == FBgn0030668            | INC051E07 | -0.15 | 0.15 |
| CG33205 == FBgn0053205           | INC019E02 | -0.15 | 0.21 |
| Paps == FBgn0020389              | INC095D06 | -0.15 | 0.11 |
| CG17760 == FBgn0033756           | INC152H05 | -0.15 | 0.25 |
| CG5984 == FBgn0039500            | INC110G03 | -0.15 | 0.20 |
| BcDNA:GH13356 == FBgn0027538     | INC002E06 | -0.15 | 0.46 |
| chif == FBgn0000307              | INC103B01 | -0.15 | 0.16 |
| Vha68-1 == FBgn0020368           | INC081C06 | -0.15 | 0.23 |
| CG14772 == FBgn0029577           | INC008F09 | -0.15 | 0.18 |
| HLH4C == FBgn0011277             | INC038A08 | -0.15 | 0.18 |
| CG9650 == FBgn0029939            | INC011D05 | -0.15 | 0.14 |
| CT22775                          | INC075D12 | -0.15 | 0.38 |
| CklIalpha == FBgn0000258         | INC003F11 | -0.15 | 0.26 |
| CG13953 == FBgn0033416           | INC154A07 | -0.15 | 0.40 |
| rols == FBgn0041096              | INC004H06 | -0.14 | 0.13 |
| Nmda1 == FBgn0013305             | INC046A11 | -0.14 | 0.19 |
| RpP0 == FBgn0000100              | INC013C02 | -0.14 | 0.26 |
| CG10987 == FBgn0040647           | INC127B08 | -0.14 | 0.17 |
| CG31311 == FBgn0051311           | INC107B06 | -0.14 | 0.09 |
| CG17723 == FBgn0035432           | INC024G08 | -0.14 | 0.10 |
| pyd == FBgn0003177               | INC110B06 | -0.14 | 0.13 |
| CG5114 == FBgn0036460            | INC155F07 | -0.14 | 0.26 |
| CG4980 == FBgn0039558            | INC049B02 | -0.14 | 0.12 |
| CG32428 == FBgn0052428           | INC141E07 | -0.14 | 0.09 |
| CG32037 == FBgn0052037           | INC033D09 | -0.14 | 0.15 |
| Sd == FBgn0003346                | INC058D01 | -0.14 | 0.41 |
| CG40016 == FBgn0058016           | INC105C11 | -0.14 | 0.23 |
| Kap-alpha3 == FBgn0027338        | INC054B10 | -0.14 | 0.14 |
| NADH dehydrogenase subunit 3     | INC153A12 | -0.14 | 0.19 |
| NADH dehydrogenase subunit 4     | INC153A04 | -0.14 | 0.22 |
| dizzy == FBgn0031798             | INC013A12 | -0.14 | 0.12 |
| guf == FBgn0014184               | INC147D04 | -0.14 | 0.07 |
| z == FBgn0004050                 | INC084E10 | -0.14 | 0.16 |
| CG5970 == FBgn0033842            | INC054D06 | -0.14 | 0.14 |
| mRpL5 == FBgn0036462             | INC032B03 | -0.14 | 0.24 |
| Kr-h2 == FBgn0028419             | INC144D08 | -0.14 | 0.09 |
| CG31738 == FBgn0051738           | INC010D06 | -0.14 | 0.20 |
| Ptp99A == FBgn0004369            | INC084G01 | -0.14 | 0.14 |
| CG3305 == FBgn0032949            | INC123D05 | -0.14 | 0.21 |
| CG32674 == FBgn0052674           | INC048B04 | -0.14 | 0.11 |
| CG11604 == FBgn0031242           | INC086H04 | -0.14 | 0.12 |

## Table2S\_Sun\_Cline

|                                |           |       |      |
|--------------------------------|-----------|-------|------|
| CG9351 == FBgn0038169          | INC030A11 | -0.14 | 0.24 |
| kisir == FBgn0029161           | INC056F11 | -0.14 | 0.17 |
| Tbh == FBgn0010329             | INC072A12 | -0.14 | 0.21 |
| cranky == FBgn0039411          | INC152G05 | -0.14 | 0.32 |
| CG6461 == FBgn0030932          | INC029H10 | -0.14 | 0.24 |
| CG14564 == FBgn0037131         | INC038G02 | -0.14 | 0.23 |
| CG16922 == FBgn0030254         | INC036E10 | -0.14 | 0.14 |
| CG10889 == FBgn0038769         | INC013F12 | -0.14 | 0.27 |
| CG2446 == FBgn0030328          | INC040E04 | -0.14 | 0.18 |
| Sod2 == FBgn0010213            | INC154C11 | -0.14 | 0.13 |
| CG9381 == FBgn0037705          | INC012G03 | -0.14 | 0.66 |
| CG30460 == FBgn0050460         | INC023E08 | -0.14 | 0.23 |
| ade5 == FBgn0020513            | INC071D02 | -0.14 | 0.21 |
| CG13921 == FBgn0035267         | INC100B04 | -0.14 | 0.12 |
| CG12607 == FBgn0035545         | INC156H01 | -0.14 | 0.17 |
| CG15709 == FBgn0034100         | INC018F03 | -0.14 | 0.15 |
| CG14286 == FBgn0038673         | INC052H12 | -0.14 | 0.15 |
| CG7033 == FBgn0030086          | INC035E04 | -0.14 | 0.33 |
| CG8680 == FBgn0031684          | INC114F12 | -0.14 | 0.21 |
| Socs36E == FBgn0041184         | INC040C02 | -0.13 | 0.11 |
| CG9643 == FBgn0031485          | INC048E04 | -0.13 | 0.17 |
| CG14016 == FBgn0031715         | INC025E07 | -0.13 | 0.16 |
| cnr == FBgn0013765             | INC078B10 | -0.13 | 0.27 |
| CG32663 == FBgn0052663         | INC156G02 | -0.13 | 0.07 |
| CG6190 == FBgn0036148          | INC017C04 | -0.13 | 0.18 |
| CG11137 == FBgn0037199         | INC121D07 | -0.13 | 0.14 |
| CG11505 == FBgn0035424         | INC019B01 | -0.13 | 0.06 |
| grp == FBgn0011598             | INC051E03 | -0.13 | 0.28 |
| CG9894 == FBgn0031453          | INC018H06 | -0.13 | 0.13 |
| mRpS31 == FBgn0036557          | INC011E04 | -0.13 | 0.29 |
| CG1161 == FBgn0037313          | INC151B04 | -0.13 | 0.20 |
| ben == FBgn0000173             | INC083F06 | -0.13 | 0.13 |
| CG6163 == FBgn0036155          | INC012F11 | -0.13 | 0.27 |
| swaPslj == FBgn0016974         | INC077E11 | -0.13 | 0.33 |
| Arf102F == FBgn0013749         | INC150E04 | -0.13 | 0.12 |
| Paf-AHalpha == FBgn0025809     | INC119G09 | -0.13 | 0.14 |
| Atpalpha == FBgn0002921        | INC016C11 | -0.13 | 0.06 |
| CG9710 == FBgn0036664          | INC125B02 | -0.13 | 0.14 |
| Mpcp == FBgn0026409            | INC128B06 | -0.13 | 0.11 |
| CG2219 == FBgn0039889          | INC152B10 | -0.13 | 0.12 |
| Tpi == FBgn0003738             | INC019G10 | -0.13 | 0.05 |
| CG4347 == FBgn0035978          | INC046C05 | -0.13 | 0.32 |
| CG9796 == FBgn0038149          | INC020F07 | -0.13 | 0.07 |
| CG14342 == FBgn0031324         | INC136D08 | -0.13 | 0.31 |
| CG5114 == FBgn0036460          | INC032A06 | -0.13 | 0.19 |
| CG9231 == FBgn0036887          | INC002C01 | -0.13 | 0.11 |
| CG13296 == FBgn0035687         | INC039B04 | -0.13 | 0.25 |
| Trp1 == FBgn0011584            | INC022E11 | -0.13 | 0.12 |
| RpL30 == FBgn0015745           | INC151B03 | -0.13 | 0.16 |
| CG9350 == FBgn0034576          | INC120B01 | -0.13 | 0.22 |
| CG5739 == FBgn0032190          | INC044A12 | -0.13 | 0.22 |
| Dsp1 == FBgn0011764            | INC101F08 | -0.13 | 0.16 |
| CG31869 == FBgn0051869         | INC122E11 | -0.13 | 0.24 |
| CG31122 == FBgn0051122         | INC136A06 | -0.13 | 0.19 |
| CG3424 == FBgn0036007          | INC092D01 | -0.13 | 0.16 |
| CG14180 == FBgn0036003         | INC044G02 | -0.13 | 0.10 |
| CG1648 == FBgn0033446          | INC010G12 | -0.13 | 0.28 |
| CG9951 == FBgn0036671          | INC051G11 | -0.13 | 0.13 |
| CG8351 == FBgn0037632          | INC126H08 | -0.13 | 0.16 |
| CG11221 == FBgn0031855         | INC125G08 | -0.13 | 0.13 |
| CG14910 == FBgn0035700         | INC155F11 | -0.12 | 0.17 |
| AGO1 == FBgn0026611            | INC151B09 | -0.12 | 0.13 |
| cytochrome c oxidase subunit I | INC153A03 | -0.12 | 0.23 |



## Table2S\_Sun\_Cline

|                               |           |       |      |
|-------------------------------|-----------|-------|------|
| CG14442 == FBgn0029893        | INC087A09 | -0.12 | 0.27 |
| CG15814 == FBgn0030873        | INC155B01 | -0.12 | 0.24 |
| CG2915 == FBgn0033241         | INC081F07 | -0.12 | 0.21 |
| CG15365 == FBgn0030077        | INC014G06 | -0.12 | 0.12 |
| yip2 == FBgn0040064           | INC075C05 | -0.12 | 0.13 |
| Pros45 == FBgn0020369         | INC154G07 | -0.12 | 0.23 |
| CG31688 == FBgn0051688        | INC070E03 | -0.12 | 0.12 |
| Dhfr == FBgn0004087           | INC109H06 | -0.12 | 0.18 |
| CG1116 == FBgn0037297         | INC033G11 | -0.12 | 0.28 |
| FK506-bp1 == FBgn0013269      | INC062E02 | -0.12 | 0.19 |
| CG8235 == FBgn0033351         | INC010A10 | -0.12 | 0.25 |
| CG3732 == FBgn0034750         | INC125F11 | -0.12 | 0.14 |
| Vha44 == FBgn0020611          | INC069E12 | -0.12 | 0.22 |
| CG8806 == FBgn0033413         | INC120H04 | -0.12 | 0.32 |
| srp == FBgn0003507            | INC104G12 | -0.12 | 0.14 |
| mRpL1 == FBgn0037566          | INC054G09 | -0.12 | 0.12 |
| Pk17E == FBgn0004462          | INC051B10 | -0.12 | 0.24 |
| CT38413                       | INC097F07 | -0.12 | 0.29 |
| CG5249 == FBgn0035625         | INC037D05 | -0.12 | 0.14 |
| CG11301 == FBgn0034726        | INC147H11 | -0.12 | 0.09 |
| ect == FBgn0000451            | INC071B10 | -0.12 | 0.25 |
| CG17530 == FBgn0034340        | INC070F09 | -0.12 | 0.31 |
| Dak1 == FBgn0028833           | INC027G12 | -0.12 | 0.18 |
| Gclm == FBgn0046114           | INC073H07 | -0.12 | 0.13 |
| Tsc1 == FBgn0026317           | INC012C05 | -0.12 | 0.22 |
| CG31305 == FBgn0051305        | INC049E12 | -0.12 | 0.18 |
| CG1910 == FBgn0022349         | INC076E02 | -0.12 | 0.28 |
| Anxb11 == FBgn0030749         | INC108F08 | -0.12 | 0.22 |
| NPC1 == FBgn0024320           | INC054H03 | -0.12 | 0.26 |
| Sdc == FBgn0010415            | INC049A06 | -0.12 | 0.22 |
| CG12608 == FBgn0030630        | INC121F12 | -0.12 | 0.23 |
| I(2)05714 == FBgn0010607      | INC090D05 | -0.12 | 0.18 |
| SF2 == FBgn0040284            | INC077E06 | -0.12 | 0.25 |
| CG17383 == FBgn0039350        | INC127E10 | -0.12 | 0.20 |
| EG:BACR42117.9 == FBgn0040357 | INC002B12 | -0.12 | 0.12 |
| CG4800 == FBgn0037874         | INC044G11 | -0.12 | 0.24 |
| CG12716 == FBgn0030439        | INC080G04 | -0.12 | 0.36 |
| CG5903 == FBgn0038400         | INC096C06 | -0.12 | 0.17 |
| CG3501 == FBgn0034791         | INC130F08 | -0.12 | 0.15 |
| Ccp84Ad == FBgn0004780        | INC008G06 | -0.12 | 0.39 |
| Hlc == FBgn0001565            | INC039D08 | -0.12 | 0.28 |
| Aef1 == FBgn0005694           | INC053H07 | -0.12 | 0.11 |
| S == FBgn0003310              | INC051B06 | -0.12 | 0.09 |
| fd96Ca == FBgn0004897         | INC027H11 | -0.12 | 0.13 |
| CG4896 == FBgn0031319         | INC152H11 | -0.12 | 0.19 |
| CG11122 == FBgn0030266        | INC014H10 | -0.12 | 0.11 |
| ARP-like == FBgn0027095       | INC136A04 | -0.12 | 0.12 |
| CG15335 == FBgn0030001        | INC052D02 | -0.12 | 0.18 |
| CG5994 == FBgn0017430         | INC012H08 | -0.12 | 0.17 |
| CG12600 == FBgn0038254        | INC154D06 | -0.12 | 0.11 |
| Vha36 == FBgn0022097          | INC120E05 | -0.12 | 0.16 |
| CG9184 == FBgn0035208         | INC104D02 | -0.12 | 0.14 |
| RSG7 == FBgn0024941           | INC024B10 | -0.11 | 0.08 |
| CG1319 == FBgn0035529         | INC110H04 | -0.11 | 0.17 |
| CG14688 == FBgn0037819        | INC108F09 | -0.11 | 0.05 |
| CG32169 == FBgn0052169        | INC118B12 | -0.11 | 0.12 |
| CG33193 == FBgn0053193        | INC034A07 | -0.11 | 0.14 |
| Mat1 == FBgn0024956           | INC064D08 | -0.11 | 0.24 |
| CG1021 == FBgn0037443         | INC072F06 | -0.11 | 0.30 |
| CG32737 == FBgn0052737        | INC045E05 | -0.11 | 0.10 |
| gl == FBgn0004618             | INC027B05 | -0.11 | 0.18 |
| VhaPPA1-1 == FBgn0028662      | INC033G01 | -0.11 | 0.30 |
| ox == FBgn0011227             | INC143F08 | -0.11 | 0.13 |

## Table2S\_Sun\_Cline

|                              |           |       |      |
|------------------------------|-----------|-------|------|
| CG18143 == FBgn0037219       | INC039A03 | -0.11 | 0.11 |
| CG2998 == FBgn0030136        | INC136A02 | -0.11 | 0.37 |
| CG7461 == FBgn0034432        | INC051B03 | -0.11 | 0.32 |
| CG18542 == FBgn0037731       | INC106A05 | -0.11 | 0.24 |
| CG11586 == FBgn0035520       | INC017B04 | -0.11 | 0.27 |
| CG7137 == FBgn0034422        | INC003D08 | -0.11 | 0.40 |
| CG2813 == FBgn0031268        | INC038B04 | -0.11 | 0.18 |
| CG8939 == FBgn0030720        | INC005F09 | -0.11 | 0.08 |
| CG7955 == FBgn0035244        | INC128H12 | -0.11 | 0.04 |
| CT41525                      | INC152F10 | -0.11 | 0.09 |
| CG14756 == FBgn0033275       | INC029H07 | -0.11 | 0.24 |
| Orc2 == FBgn0015270          | INC021A10 | -0.11 | 0.19 |
| Trp1 == FBgn0011584          | INC015G02 | -0.11 | 0.17 |
| CG4875 == FBgn0030801        | INC062A07 | -0.11 | 0.32 |
| CG3033 == FBgn0029818        | INC016H07 | -0.11 | 0.24 |
| CG10992 == FBgn0030521       | INC154G06 | -0.11 | 0.15 |
| Ost48 == FBgn0014868         | INC015C10 | -0.11 | 0.10 |
| CG7670 == FBgn0038608        | INC033A12 | -0.11 | 0.38 |
| CG8814 == FBgn0031478        | INC121F06 | -0.11 | 0.12 |
| Su(dx) == FBgn0003557        | INC086E09 | -0.11 | 0.26 |
| CG11504 == FBgn0039733       | INC037H08 | -0.11 | 0.12 |
| CG6764 == FBgn0037899        | INC023F10 | -0.11 | 0.42 |
| NADH dehydrogenase subunit 6 | INC153A10 | -0.11 | 0.24 |
| Cf2 == FBgn0000286           | INC072F11 | -0.11 | 0.23 |
| CstF-64 == FBgn0027841       | INC021F05 | -0.11 | 0.12 |
| CG7010 == FBgn0029721        | INC016F10 | -0.11 | 0.38 |
| Pros28.1 == FBgn0004066      | INC120G01 | -0.11 | 0.24 |
| Ser == FBgn0004197           | INC063G12 | -0.11 | 0.38 |
| torp4a == FBgn0025615        | INC063C08 | -0.11 | 0.19 |
| ESTS:39C10S == FBgn0014427   | INC056A02 | -0.11 | 0.15 |
| VhaAC39 == FBgn0028665       | INC082A08 | -0.11 | 0.21 |
| CG14654 == FBgn0037273       | INC107B05 | -0.11 | 0.16 |
| Bj1 == FBgn0002638           | INC063G06 | -0.11 | 0.29 |
| CG10186 == FBgn0032797       | INC080F01 | -0.11 | 0.07 |
| CG17724 == FBgn0033802       | INC101G11 | -0.11 | 0.12 |
| CG32389 == FBgn0052389       | INC020H06 | -0.11 | 0.19 |
| Rac1 == FBgn0010333          | INC101A11 | -0.11 | 0.16 |
| Cyp4d2 == FBgn0011576        | INC117D02 | -0.11 | 0.14 |
| CG8327 == FBgn0037723        | INC053A08 | -0.11 | 0.11 |
| Nrt == FBgn0004108           | INC112A10 | -0.11 | 0.18 |
| CG9006 == FBgn0033637        | INC010F12 | -0.11 | 0.19 |
| CycB == FBgn0000405          | INC131A12 | -0.11 | 0.11 |
| CG40285 == FBgn0058285       | INC128F07 | -0.11 | 0.22 |
| Gdi == FBgn0004868           | INC015C02 | -0.11 | 0.16 |
| Hmu == FBgn0015737           | INC085H12 | -0.11 | 0.24 |
| CG32432 == FBgn0052432       | INC021E04 | -0.11 | 0.19 |
| emc == FBgn0000575           | INC071H02 | -0.11 | 0.34 |
| Adk3 == FBgn0042094          | INC131A11 | -0.11 | 0.12 |
| vn == FBgn0003984            | INC085H04 | -0.10 | 0.16 |
| CG31990 == FBgn0051990       | INC119B02 | -0.10 | 0.16 |
| GNBP1 == FBgn0040323         | INC042D02 | -0.10 | 0.17 |
| fru == FBgn0004652           | INC053D08 | -0.10 | 0.12 |
| CG15889 == FBgn0038128       | INC094C01 | -0.10 | 0.17 |
| CG9339 == FBgn0032901        | INC048E06 | -0.10 | 0.26 |
| NetA == FBgn0015773          | INC040A10 | -0.10 | 0.15 |
| Hsp26 == FBgn0001225         | INC020F02 | -0.10 | 0.16 |
| TfIIIEalpha == FBgn0015828   | INC076C01 | -0.10 | 0.31 |
| CG8157 == FBgn0034010        | INC112A08 | -0.10 | 0.13 |
| CG8765 == FBgn0036900        | INC038G10 | -0.10 | 0.22 |
| cenG1A == FBgn0028509        | INC107H06 | -0.10 | 0.22 |
| CG7556 == FBgn0030990        | INC013D01 | -0.10 | 0.19 |
| CG33207 == FBgn0053207       | INC136C04 | -0.10 | 0.07 |
| CG14750 == FBgn0033314       | INC048D06 | -0.10 | 0.19 |

## Table2S\_Sun\_Cline

|                              |           |       |      |
|------------------------------|-----------|-------|------|
| dj-1beta == FBgn0039802      | INC117C05 | -0.10 | 0.13 |
| CG7305 == FBgn0038557        | INC013D02 | -0.10 | 0.13 |
| CG3424 == FBgn0036007        | INC090B06 | -0.10 | 0.12 |
| CG11679 == FBgn0030678       | INC002H08 | -0.10 | 0.32 |
| CG7970 == FBgn0035252        | INC152A03 | -0.10 | 0.08 |
| CG31191 == FBgn0051191       | INC027B10 | -0.10 | 0.45 |
| CG11455 == FBgn0031228       | INC062A04 | -0.10 | 0.23 |
| Dll == FBgn0000157           | INC076G12 | -0.10 | 0.28 |
| Hex-A == FBgn0001186         | INC051F04 | -0.10 | 0.15 |
| CG9298 == FBgn0032060        | INC007C02 | -0.10 | 0.23 |
| CG6769 == FBgn0030878        | INC154A01 | -0.10 | 0.16 |
| CG9265 == FBgn0032910        | INC034A10 | -0.10 | 0.37 |
| Bin1 == FBgn0024491          | INC111F09 | -0.10 | 0.17 |
| me31B == FBgn0004419         | INC091E07 | -0.10 | 0.14 |
| CG14377 == FBgn0038148       | INC153C12 | -0.10 | 0.28 |
| CG31361 == FBgn0051361       | INC047H10 | -0.10 | 0.22 |
| mas == FBgn0011653           | INC063B05 | -0.10 | 0.13 |
| CG6666 == FBgn0037873        | INC009A01 | -0.10 | 0.18 |
| RpL46 == FBgn0023170         | INC151F10 | -0.10 | 0.12 |
| CG12672 == FBgn0030886       | INC016H10 | -0.10 | 0.13 |
| CG11386 == FBgn0029973       | INC126D07 | -0.10 | 0.19 |
| CG12013 == FBgn0035438       | INC128D10 | -0.10 | 0.17 |
| CG8009 == FBgn0036090        | INC149G12 | -0.10 | 0.11 |
| B4 == FBgn0023407            | INC147F04 | -0.10 | 0.08 |
| pk == FBgn0003090            | INC155A03 | -0.10 | 0.19 |
| CG12512 == FBgn0031703       | INC103F11 | -0.10 | 0.17 |
| G-alpha47A == FBgn0001122    | INC092A09 | -0.10 | 0.30 |
| Rab11 == FBgn0015790         | INC099E08 | -0.10 | 0.12 |
| Esp == FBgn0013953           | INC056G11 | -0.10 | 0.19 |
| CG2249 == FBgn0040773        | INC124A11 | -0.10 | 0.15 |
| so == FBgn0003460            | INC063H05 | -0.10 | 0.17 |
| CG15616 == FBgn0034153       | INC158C08 | -0.10 | 0.26 |
| CG3752 == FBgn0032114        | INC097G05 | -0.10 | 0.11 |
| Adk2 == FBgn0022708          | INC113B09 | -0.10 | 0.22 |
| RpL8 == FBgn0024939          | INC005A08 | -0.10 | 0.16 |
| CG13991 == FBgn0031785       | INC094H06 | -0.10 | 0.21 |
| jim == FBgn0027339           | INC042D05 | -0.10 | 0.11 |
| aret == FBgn0000114          | INC068F03 | -0.10 | 0.19 |
| CG8979 == FBgn0033669        | INC108B02 | -0.10 | 0.11 |
| CG4802 == FBgn0034215        | INC074F01 | -0.10 | 0.13 |
| Fim == FBgn0024238           | INC057C08 | -0.10 | 0.12 |
| Ca-beta == FBgn0015608       | INC123G03 | -0.10 | 0.23 |
| NUCB1 == FBgn0052190         | INC003A02 | -0.10 | 0.13 |
| mRpL4 == FBgn0001995         | INC038E08 | -0.10 | 0.05 |
| CG6022 == FBgn0038925        | INC067D06 | -0.10 | 0.09 |
| CT33856                      | INC153G11 | -0.10 | 0.26 |
| CT34046                      | INC152A04 | -0.10 | 0.09 |
| agt == FBgn0024912           | INC051D06 | -0.10 | 0.20 |
| CG10648 == FBgn0030067       | INC015D05 | -0.10 | 0.32 |
| CG13779 == FBgn0040954       | INC143E12 | -0.10 | 0.19 |
| CG6523 == FBgn0032509        | INC143A04 | -0.10 | 0.12 |
| Slbp == FBgn0041186          | INC093E11 | -0.10 | 0.25 |
| Surf6 == FBgn0038746         | INC022C04 | -0.09 | 0.17 |
| BcDNA:LD34343 == FBgn0027492 | INC012B05 | -0.09 | 0.12 |
| CG32772 == FBgn0052772       | INC113A06 | -0.09 | 0.17 |
| CG5053 == FBgn0039352        | INC078B05 | -0.09 | 0.15 |
| mei-P26 == FBgn0026206       | INC094B05 | -0.09 | 0.30 |
| CG2469 == FBgn0035205        | INC100F12 | -0.09 | 0.19 |
| CG9300 == FBgn0036886        | INC044G05 | -0.09 | 0.25 |
| sns == FBgn0024189           | INC141E11 | -0.09 | 0.13 |
| CG11985 == FBgn0040534       | INC150B03 | -0.09 | 0.10 |
| toe == FBgn0036285           | INC075G08 | -0.09 | 0.16 |
| CG15157 == FBgn0032675       | INC040C11 | -0.09 | 0.15 |

## Table2S\_Sun\_Cline

|                              |           |       |      |
|------------------------------|-----------|-------|------|
| CG18600 == FBgn0038601       | INC049D04 | -0.09 | 0.16 |
| CG13165 == FBgn0033707       | INC114H01 | -0.09 | 0.21 |
| SoxN == FBgn0029123          | INC032G08 | -0.09 | 0.18 |
| CG31330 == FBgn0051330       | INC053D06 | -0.09 | 0.28 |
| Cct5 == FBgn0010621          | INC057G12 | -0.09 | 0.30 |
| CG9817 == FBgn0030219        | INC072F01 | -0.09 | 0.21 |
| CG12324 == FBgn0033555       | INC050G08 | -0.09 | 0.24 |
| E(Pc) == FBgn0000581         | INC156H02 | -0.09 | 0.07 |
| CG16953 == FBgn0038809       | INC076B02 | -0.09 | 0.20 |
| CG6453 == FBgn0032643        | INC031B05 | -0.09 | 0.18 |
| CG1837 == FBgn0030329        | INC083H09 | -0.09 | 0.29 |
| sty == FBgn0014388           | INC156G09 | -0.09 | 0.14 |
| CSN5 == FBgn0027053          | INC017A10 | -0.09 | 0.19 |
| cnj == FBgn0000339           | INC147D09 | -0.09 | 0.23 |
| CG18624 == FBgn0029971       | INC080B12 | -0.09 | 0.20 |
| CT34536                      | INC134A08 | -0.09 | 0.19 |
| Srp54k == FBgn0010747        | INC063A11 | -0.09 | 0.18 |
| EG:63B12.12 == FBgn0026088   | INC108H12 | -0.09 | 0.20 |
| CG32521 == FBgn0052521       | INC085F06 | -0.09 | 0.12 |
| Rac2 == FBgn0014011          | INC056D11 | -0.09 | 0.19 |
| CT33739                      | INC133C07 | -0.09 | 0.06 |
| CG31738 == FBgn0051738       | INC111F06 | -0.09 | 0.15 |
| hamlet == FBgn0045852        | INC005C02 | -0.09 | 0.17 |
| CG31090 == FBgn0051090       | INC125D05 | -0.09 | 0.16 |
| CG31209 == FBgn0051209       | INC153D12 | -0.09 | 0.11 |
| CG33110 == FBgn0053110       | INC144H03 | -0.09 | 0.18 |
| CG5516 == FBgn0038389        | INC037C11 | -0.09 | 0.11 |
| pnr == FBgn0003117           | INC014H04 | -0.09 | 0.18 |
| CG14931 == FBgn0032374       | INC017D04 | -0.09 | 0.24 |
| CG32264 == FBgn0052264       | INC012E10 | -0.09 | 0.22 |
| CG6340 == FBgn0030648        | INC154G01 | -0.09 | 0.15 |
| org-1 == FBgn0021767         | INC020D05 | -0.09 | 0.41 |
| CG8449 == FBgn0038129        | INC100C11 | -0.09 | 0.13 |
| CG9339 == FBgn0032901        | INC061F05 | -0.09 | 0.20 |
| Tps1 == FBgn0027560          | INC054G04 | -0.09 | 0.12 |
| Gip == FBgn0011770           | INC151H06 | -0.09 | 0.24 |
| BcDNA:LD22118 == FBgn0026575 | INC056F09 | -0.09 | 0.29 |
| CG11799 == FBgn0036134       | INC076E04 | -0.09 | 0.27 |
| CG15240 == FBgn0029684       | INC004H04 | -0.09 | 0.18 |
| CG7834 == FBgn0039697        | INC039C06 | -0.09 | 0.25 |
| CG32029 == FBgn0052029       | INC126F01 | -0.09 | 0.11 |
| mRpL21 == FBgn0036853        | INC012D01 | -0.09 | 0.22 |
| CG10737 == FBgn0034420       | INC122G12 | -0.09 | 0.24 |
| CG11203 == FBgn0030249       | INC064H05 | -0.09 | 0.10 |
| CG2310 == FBgn0039665        | INC113E12 | -0.09 | 0.24 |
| CG8569 == FBgn0033752        | INC041F07 | -0.09 | 0.13 |
| CG12625 == FBgn0030282       | INC156A08 | -0.09 | 0.17 |
| Sod == FBgn0003462           | INC021D02 | -0.09 | 0.16 |
| CG1902 == FBgn0033434        | INC113E11 | -0.09 | 0.18 |
| CG11811 == FBgn0036099       | INC093C11 | -0.09 | 0.07 |
| BcDNA:GH10120 == FBgn0027556 | INC126C08 | -0.09 | 0.12 |
| CG6770 == FBgn0032400        | INC097E03 | -0.09 | 0.15 |
| CG14264 == FBgn0039512       | INC008H05 | -0.09 | 0.15 |
| CG12123 == FBgn0030039       | INC129E09 | -0.09 | 0.16 |
| Irp-1B == FBgn0024957        | INC017D06 | -0.09 | 0.28 |
| CG33113 == FBgn0053113       | INC118F09 | -0.09 | 0.12 |
| CG15236 == FBgn0033108       | INC009A05 | -0.09 | 0.25 |
| S6k == FBgn0015806           | INC029H02 | -0.09 | 0.13 |
| CG8176 == FBgn0037702        | INC083H06 | -0.09 | 0.34 |
| RpP1 == FBgn0003274          | INC088H11 | -0.09 | 0.19 |
| CG5546 == FBgn0036761        | INC096D06 | -0.09 | 0.15 |
| caup == FBgn0015919          | INC051A10 | -0.09 | 0.10 |
| bun == FBgn0010460           | INC116E12 | -0.09 | 0.18 |

## Table2S\_Sun\_Cline

|                           |           |       |      |
|---------------------------|-----------|-------|------|
| pnut == FBgn0013726       | INC053A10 | -0.09 | 0.11 |
| CG2765 == FBgn0035087     | INC009H11 | -0.09 | 0.17 |
| Cctgamma == FBgn0015019   | INC028C08 | -0.09 | 0.11 |
| CG1154 == FBgn0037419     | INC085F04 | -0.08 | 0.12 |
| CG17510 == FBgn0039969    | INC122H05 | -0.08 | 0.15 |
| CG4880 == FBgn0030803     | INC032C08 | -0.08 | 0.10 |
| pen == FBgn0015527        | INC024F10 | -0.08 | 0.31 |
| CG1665 == FBgn0033451     | INC154E07 | -0.08 | 0.20 |
| CG5525 == FBgn0032444     | INC100C08 | -0.08 | 0.13 |
| Mnn1 == FBgn0031885       | INC072D05 | -0.08 | 0.36 |
| CG1749 == FBgn0030305     | INC035D01 | -0.08 | 0.13 |
| CG14057 == FBgn0036696    | INC001F11 | -0.08 | 0.11 |
| CG31146 == FBgn0051146    | INC040E02 | -0.08 | 0.33 |
| Bx42 == FBgn0004856       | INC028G02 | -0.08 | 0.15 |
| CG8489 == FBgn0038225     | INC103F10 | -0.08 | 0.09 |
| CG8231 == FBgn0030681     | INC155C10 | -0.08 | 0.18 |
| ltp-r83A == FBgn0010051   | INC086C01 | -0.08 | 0.19 |
| mRpL30 == FBgn0029718     | INC112H06 | -0.08 | 0.34 |
| CG31729 == FBgn0051729    | INC147F07 | -0.08 | 0.25 |
| CG14358 == FBgn0038199    | INC124F02 | -0.08 | 0.14 |
| CG15036 == FBgn0040922    | INC149B06 | -0.08 | 0.14 |
| CG14683 == FBgn0037822    | INC043H08 | -0.08 | 0.36 |
| CG12428 == FBgn0039543    | INC083B04 | -0.08 | 0.11 |
| CG11984 == FBgn0037655    | INC103D07 | -0.08 | 0.64 |
| CG8954 == FBgn0019890     | INC008A04 | -0.08 | 0.17 |
| CG4090 == FBgn0038492     | INC154H10 | -0.08 | 0.09 |
| CG32611 == FBgn0052611    | INC032C07 | -0.08 | 0.09 |
| mRpL-CI-B8 == FBgn0034893 | INC116H07 | -0.08 | 0.12 |
| CG32732 == FBgn0052732    | INC095C10 | -0.08 | 0.15 |
| CG17788 == FBgn0030392    | INC027D12 | -0.08 | 0.18 |
| mago == FBgn0002736       | INC109D03 | -0.08 | 0.17 |
| SmD3 == FBgn0023167       | INC153D06 | -0.08 | 0.13 |
| CG8602 == FBgn0035763     | INC018A10 | -0.08 | 0.21 |
| mRpS7 == FBgn0032236      | INC084A10 | -0.08 | 0.24 |
| CG30389 == FBgn0050389    | INC070C05 | -0.08 | 0.29 |
| CG11184 == FBgn0034923    | INC064C11 | -0.08 | 0.20 |
| CG3564 == FBgn0029709     | INC006G03 | -0.08 | 0.25 |
| p16-ARC == FBgn0031437    | INC014H12 | -0.08 | 0.31 |
| Dl == FBgn0000463         | INC089C07 | -0.08 | 0.29 |
| crp == FBgn0001994        | INC085C10 | -0.08 | 0.20 |
| CG15012 == FBgn0035528    | INC110H02 | -0.08 | 0.15 |
| sun == FBgn0014391        | INC153B02 | -0.08 | 0.10 |
| EG:25E8.1 == FBgn0023529  | INC078A11 | -0.08 | 0.12 |
| CT34219                   | INC144D05 | -0.08 | 0.16 |
| Rab2 == FBgn0014009       | INC007C12 | -0.08 | 0.19 |
| Sod2 == FBgn0010213       | INC104A04 | -0.08 | 0.15 |
| mRpL20 == FBgn0036335     | INC115E03 | -0.08 | 0.23 |
| Xpac == FBgn0004832       | INC025E05 | -0.08 | 0.21 |
| CG17280 == FBgn0034877    | INC115D04 | -0.08 | 0.15 |
| Pc == FBgn0003042         | INC064D05 | -0.08 | 0.23 |
| CG31534 == FBgn0051534    | INC094H08 | -0.08 | 0.24 |
| SNF4Agamma == FBgn0025803 | INC070C08 | -0.08 | 0.16 |
| Syx5 == FBgn0011708       | INC065C03 | -0.08 | 0.23 |
| CG4338 == FBgn0038313     | INC029A09 | -0.08 | 0.55 |
| CG8132 == FBgn0037687     | INC027H12 | -0.08 | 0.17 |
| GCR(ich) == FBgn0029170   | INC153F06 | -0.08 | 0.12 |
| CG6398 == FBgn0030870     | INC054F12 | -0.08 | 0.15 |
| CG30023 == FBgn0050023    | INC032E04 | -0.08 | 0.16 |
| CG8583 == FBgn0035771     | INC070B02 | -0.08 | 0.13 |
| rhea == FBgn0020254       | INC101E03 | -0.08 | 0.15 |
| B-H2 == FBgn0004854       | INC153H01 | -0.08 | 0.06 |
| CG8386 == FBgn0034061     | INC152G08 | -0.08 | 0.16 |
| CG12233 == FBgn0031024    | INC101G04 | -0.08 | 0.21 |

## Table2S\_Sun\_Cline

|                              |           |       |      |
|------------------------------|-----------|-------|------|
| EG:115C2.1 == FBgn0025640    | INC120B03 | -0.08 | 0.16 |
| cnc == FBgn0000338           | INC011H12 | -0.08 | 0.17 |
| Tequila == FBgn0023479       | INC157E05 | -0.08 | 0.28 |
| CG32737 == FBgn0052737       | INC024F02 | -0.08 | 0.14 |
| CG11989 == FBgn0036064       | INC071C08 | -0.08 | 0.22 |
| CG15507 == FBgn0039693       | INC019A01 | -0.08 | 0.41 |
| CG15470 == FBgn0029731       | INC012D12 | -0.08 | 0.17 |
| CG5677 == FBgn0039172        | INC012G09 | -0.08 | 0.12 |
| CG7031 == FBgn0039027        | INC015E04 | -0.08 | 0.16 |
| CG12775 == FBgn0032987       | INC062F08 | -0.08 | 0.16 |
| CG13560 == FBgn0034899       | INC006G04 | -0.08 | 0.38 |
| CG3214 == FBgn0031436        | INC142B08 | -0.08 | 0.13 |
| CG12546 == FBgn0037178       | INC130C10 | -0.08 | 0.12 |
| CG5972 == FBgn0031781        | INC080E03 | -0.08 | 0.25 |
| CG3508 == FBgn0038251        | INC119B11 | -0.08 | 0.07 |
| Eip74EF == FBgn0000567       | INC020D02 | -0.08 | 0.21 |
| CG5468 == FBgn0039434        | INC119D06 | -0.08 | 0.27 |
| wal == FBgn0010516           | INC049D12 | -0.08 | 0.16 |
| mRpS35 == FBgn0034361        | INC152E04 | -0.08 | 0.14 |
| scu == FBgn0021765           | INC071C09 | -0.08 | 0.12 |
| CG14516 == FBgn0039640       | INC102F08 | -0.08 | 0.20 |
| SK == FBgn0029761            | INC061E11 | -0.08 | 0.22 |
| mRpL3 == FBgn0030686         | INC021E12 | -0.08 | 0.20 |
| CG14358 == FBgn0038199       | INC158A10 | -0.08 | 0.15 |
| Uch-L3 == FBgn0011327        | INC093G11 | -0.08 | 0.18 |
| CG17326 == FBgn0033575       | INC015G06 | -0.08 | 0.23 |
| mRpL9 == FBgn0038319         | INC091G02 | -0.08 | 0.16 |
| CG12007 == FBgn0037293       | INC090B03 | -0.08 | 0.13 |
| BcDNA:LD24639 == FBgn0027501 | INC068D04 | -0.08 | 0.14 |
| CG31665 == FBgn0051665       | INC041E06 | -0.08 | 0.12 |
| CT39402                      | INC003B12 | -0.08 | 0.09 |
| Pp1-13C == FBgn0003132       | INC057H01 | -0.08 | 0.16 |
| Uev1A == FBgn0035601         | INC152C10 | -0.08 | 0.07 |
| Lim3 == FBgn0002023          | INC106C04 | -0.07 | 0.28 |
| CG13222 == FBgn0033602       | INC087F11 | -0.07 | 0.20 |
| unc-4 == FBgn0024184         | INC047F09 | -0.07 | 0.14 |
| I(2)03709 == FBgn0010551     | INC149E12 | -0.07 | 0.19 |
| CG7484 == FBgn0036745        | INC109E05 | -0.07 | 0.19 |
| BG:DS09217.4 == FBgn0028507  | INC027E12 | -0.07 | 0.14 |
| CG3678 == FBgn0038461        | INC117B08 | -0.07 | 0.07 |
| CG4547 == FBgn0029907        | INC115E02 | -0.07 | 0.24 |
| CG7950 == FBgn0039745        | INC084B02 | -0.07 | 0.17 |
| CG7415 == FBgn0037580        | INC086E11 | -0.07 | 0.47 |
| CG32380 == FBgn0052380       | INC155A02 | -0.07 | 0.14 |
| CG17742 == FBgn0035746       | INC109A10 | -0.07 | 0.19 |
| CG31708 == FBgn0051708       | INC117E01 | -0.07 | 0.11 |
| CG12428 == FBgn0039543       | INC068H12 | -0.07 | 0.17 |
| CG3011 == FBgn0029823        | INC062A02 | -0.07 | 0.18 |
| AP-47 == FBgn0024833         | INC032E02 | -0.07 | 0.18 |
| CG13043 == FBgn0036600       | INC078A12 | -0.07 | 0.14 |
| CG14618 == FBgn0031189       | INC040H04 | -0.07 | 0.14 |
| Ten-a == FBgn0004446         | INC019C08 | -0.07 | 0.22 |
| CG6118 == FBgn0038339        | INC009E11 | -0.07 | 0.29 |
| CG4136 == FBgn0029775        | INC015D09 | -0.07 | 0.27 |
| CG9836 == FBgn0037637        | INC024B05 | -0.07 | 0.06 |
| nmo == FBgn0011817           | INC111B02 | -0.07 | 0.08 |
| larp == FBgn0040108          | INC040F12 | -0.07 | 0.18 |
| CG15781 == FBgn0029774       | INC012A02 | -0.07 | 0.19 |
| CG15119 == FBgn0034430       | INC038E06 | -0.07 | 0.21 |
| CG6140 == FBgn0036162        | INC008G07 | -0.07 | 0.19 |
| CG12650 == FBgn0040932       | INC134C06 | -0.07 | 0.18 |
| mRpS18c == FBgn0051450       | INC129F09 | -0.07 | 0.14 |
| skpB == FBgn0026176          | INC118E06 | -0.07 | 0.18 |

## Table2S\_Sun\_Cline

|                              |           |       |      |
|------------------------------|-----------|-------|------|
| CG9140 == FBgn0031771        | INC037A09 | -0.07 | 0.17 |
| CG13675 == FBgn0035845       | INC086F08 | -0.07 | 0.13 |
| CT33477                      | INC146C12 | -0.07 | 0.14 |
| CG1440 == FBgn0030038        | INC046H09 | -0.07 | 0.07 |
| CG17597 == FBgn0032715       | INC119D03 | -0.07 | 0.19 |
| CG3902 == FBgn0036824        | INC034A11 | -0.07 | 0.09 |
| Aats-val == FBgn0027079      | INC030G12 | -0.07 | 0.12 |
| CG7414 == FBgn0037135        | INC078F02 | -0.07 | 0.15 |
| cgl == FBgn0000289           | INC034E10 | -0.07 | 0.16 |
| CG9288 == FBgn0038182        | INC044D07 | -0.07 | 0.20 |
| Eip55E == FBgn0000566        | INC081H02 | -0.07 | 0.14 |
| CG8928 == FBgn0030711        | INC133B10 | -0.07 | 0.13 |
| CG15314 == FBgn0030172       | INC010A09 | -0.07 | 0.28 |
| Ggamma1 == FBgn0004921       | INC016B08 | -0.07 | 0.11 |
| BcDNA:LD23830 == FBgn0028473 | INC054E12 | -0.07 | 0.20 |
| Pen == FBgn0011823           | INC074D05 | -0.07 | 0.20 |
| D19B == FBgn0022699          | INC037C12 | -0.07 | 0.17 |
| Nopp140 == FBgn0037137       | INC078G11 | -0.07 | 0.17 |
| CG4071 == FBgn0034744        | INC029B12 | -0.07 | 0.12 |
| CG32521 == FBgn0052521       | INC154F10 | -0.07 | 0.08 |
| CG9821 == FBgn0037636        | INC072F08 | -0.07 | 0.16 |
| CG13097 == FBgn0032051       | INC082B01 | -0.07 | 0.11 |
| CG5966 == FBgn0029831        | INC058F10 | -0.07 | 0.18 |
| CG32791 == FBgn0052791       | INC077G11 | -0.07 | 0.20 |
| CG9391 == FBgn0037063        | INC109C03 | -0.07 | 0.19 |
| CG31619 == FBgn0051619       | INC107E09 | -0.07 | 0.13 |
| CG17383 == FBgn0039350       | INC093D11 | -0.07 | 0.10 |
| CG32541 == FBgn0052541       | INC028E06 | -0.07 | 0.27 |
| CG14575 == FBgn0037100       | INC001A05 | -0.07 | 0.14 |
| CG14911 == FBgn0035701       | INC121B11 | -0.07 | 0.39 |
| CG5535 == FBgn0036764        | INC038F02 | -0.07 | 0.16 |
| CG17337 == FBgn0033035       | INC092F05 | -0.07 | 0.21 |
| CG32264 == FBgn0052264       | INC154B08 | -0.07 | 0.19 |
| Pros45 == FBgn0020369        | INC061D08 | -0.07 | 0.34 |
| Vha44 == FBgn0020611         | INC094H04 | -0.07 | 0.14 |
| Tom40 == FBgn0016041         | INC109B01 | -0.07 | 0.13 |
| CG15204 == FBgn0030256       | INC006G01 | -0.07 | 0.10 |
| CT33490                      | INC153G06 | -0.07 | 0.11 |
| ATPsyn-Cf6 == FBgn0016119    | INC135H11 | -0.07 | 0.27 |
| CG18081 == FBgn0036537       | INC141F08 | -0.07 | 0.06 |
| CG32626 == FBgn0052626       | INC150H07 | -0.07 | 0.15 |
| CG10298 == FBgn0037432       | INC033B11 | -0.07 | 0.08 |
| Roc1a == FBgn0025638         | INC122A11 | -0.07 | 0.23 |
| sog == FBgn0003463           | INC005G01 | -0.07 | 0.20 |
| sphinx == FBgn0039931        | INC054F04 | -0.07 | 0.23 |
| Mcm5 == FBgn0017577          | INC051B04 | -0.07 | 0.16 |
| CG1017 == FBgn0035294        | INC040C08 | -0.07 | 0.07 |
| CG1475 == FBgn0037351        | INC039F06 | -0.07 | 0.15 |
| Tapdelta == FBgn0021795      | INC109D07 | -0.07 | 0.10 |
| CG14420 == FBgn0029643       | INC044C11 | -0.07 | 0.19 |
| grh == FBgn0004586           | INC050C04 | -0.07 | 0.20 |
| CG7946 == FBgn0039743        | INC084H05 | -0.07 | 0.27 |
| CG9569 == FBgn0031084        | INC007C06 | -0.06 | 0.19 |
| CG12107 == FBgn0033209       | INC060A08 | -0.06 | 0.27 |
| Spt5 == FBgn0040273          | INC036H12 | -0.06 | 0.24 |
| CG5064 == FBgn0035947        | INC050E02 | -0.06 | 0.23 |
| CG9306 == FBgn0032511        | INC107H02 | -0.06 | 0.11 |
| CG15481 == FBgn0032487       | INC062G12 | -0.06 | 0.19 |
| CG1381 == FBgn0033485        | INC118C08 | -0.06 | 0.20 |
| tsu == FBgn0033378           | INC119F11 | -0.06 | 0.18 |
| CG6751 == FBgn0033562        | INC154A06 | -0.06 | 0.14 |
| CG13917 == FBgn0035237       | INC100A08 | -0.06 | 0.07 |
| A3-3 == FBgn0028550          | INC091E08 | -0.06 | 0.12 |

## Table2S\_Sun\_Cline

|                              |           |       |      |
|------------------------------|-----------|-------|------|
| CG32632 == FBgn0052632       | INC009C06 | -0.06 | 0.14 |
| CG1753 == FBgn0031148        | INC110D11 | -0.06 | 0.09 |
| BcDNA:GH03108 == FBgn0027599 | INC059C02 | -0.06 | 0.12 |
| Doc3 == FBgn0035954          | INC028H06 | -0.06 | 0.23 |
| CG12199 == FBgn0031016       | INC077C08 | -0.06 | 0.19 |
| shn == FBgn0003396           | INC018A08 | -0.06 | 0.19 |
| CG6631 == FBgn0039206        | INC042B07 | -0.06 | 0.22 |
| mRpL24 == FBgn0031651        | INC120H05 | -0.06 | 0.19 |
| CG10978 == FBgn0037374       | INC075A03 | -0.06 | 0.12 |
| CG12720 == FBgn0030379       | INC081C03 | -0.06 | 0.10 |
| CG15105 == FBgn0034412       | INC068C05 | -0.06 | 0.20 |
| CG12304 == FBgn0036515       | INC120F06 | -0.06 | 0.19 |
| CG9797 == FBgn0037621        | INC021E05 | -0.06 | 0.06 |
| CG3403 == FBgn0033094        | INC089F10 | -0.06 | 0.21 |
| EG:95B7.3 == FBgn0024978     | INC011F12 | -0.06 | 0.12 |
| CG11085 == FBgn0030408       | INC054E07 | -0.06 | 0.20 |
| CG5706 == FBgn0039175        | INC054F07 | -0.06 | 0.17 |
| CG9742 == FBgn0030765        | INC136G03 | -0.06 | 0.09 |
| CG12877 == FBgn0039544       | INC068E03 | -0.06 | 0.16 |
| CG7845 == FBgn0033059        | INC033F12 | -0.06 | 0.21 |
| CG8516 == FBgn0037757        | INC154G08 | -0.06 | 0.09 |
| CG3887 == FBgn0031670        | INC056G10 | -0.06 | 0.15 |
| CG31211 == FBgn0051211       | INC005B09 | -0.06 | 0.14 |
| Nacalpha == FBgn0017565      | INC073B08 | -0.06 | 0.17 |
| CG5004 == FBgn0030820        | INC026F07 | -0.06 | 0.26 |
| Cklalpha == FBgn0015024      | INC117H01 | -0.06 | 0.12 |
| His4r == FBgn0013981         | INC128E05 | -0.06 | 0.37 |
| RpS19 == FBgn0010412         | INC013E01 | -0.06 | 0.29 |
| metl == FBgn0035247          | INC100C05 | -0.06 | 0.10 |
| TfIIIB == FBgn0004915        | INC120A08 | -0.06 | 0.21 |
| CG7014 == FBgn0038277        | INC138C01 | -0.06 | 0.08 |
| CG13365 == FBgn0029529       | INC096G06 | -0.06 | 0.15 |
| CG30463 == FBgn0050463       | INC158E12 | -0.06 | 0.11 |
| CG32737 == FBgn0052737       | INC075G02 | -0.06 | 0.07 |
| sn == FBgn0003447            | INC071F08 | -0.06 | 0.12 |
| nonA == FBgn0004227          | INC155B09 | -0.06 | 0.26 |
| Cp15 == FBgn0000355          | INC117B03 | -0.06 | 0.16 |
| CT23133                      | INC011G08 | -0.06 | 0.11 |
| CG16975 == FBgn0032475       | INC154A09 | -0.06 | 0.15 |
| CG14459 == FBgn0037171       | INC054C07 | -0.06 | 0.14 |
| pelo == FBgn0011207          | INC101G03 | -0.06 | 0.14 |
| Trip1 == FBgn0015834         | INC037C10 | -0.06 | 0.23 |
| CG10277 == FBgn0037442       | INC090A11 | -0.06 | 0.15 |
| CG18212 == FBgn0038535       | INC115E09 | -0.06 | 0.05 |
| ras == FBgn0003204           | INC066C03 | -0.06 | 0.10 |
| CG10225 == FBgn0039110       | INC033F02 | -0.06 | 0.12 |
| mRpL23 == FBgn0035335        | INC137B12 | -0.06 | 0.14 |
| CG9351 == FBgn0038169        | INC155A10 | -0.06 | 0.24 |
| PPP4R2r == FBgn0030208       | INC041H08 | -0.06 | 0.11 |
| CG5080 == FBgn0031313        | INC051G05 | -0.06 | 0.12 |
| dx == FBgn0000524            | INC098F11 | -0.06 | 0.20 |
| CG31209 == FBgn0051209       | INC024B08 | -0.06 | 0.32 |
| CG14164 == FBgn0036057       | INC156B12 | -0.06 | 0.13 |
| CG13627 == FBgn0039217       | INC029H03 | -0.06 | 0.13 |
| CG15881 == FBgn0036909       | INC147D12 | -0.06 | 0.15 |
| CG13673 == FBgn0040831       | INC151B11 | -0.06 | 0.31 |
| CG30084 == FBgn0050084       | INC150B04 | -0.06 | 0.09 |
| CG7603 == FBgn0036726        | INC121G05 | -0.06 | 0.14 |
| CG6769 == FBgn0030878        | INC097D12 | -0.06 | 0.10 |
| CG6728 == FBgn0037896        | INC051H08 | -0.06 | 0.06 |
| Vha13 == FBgn0026753         | INC110B07 | -0.06 | 0.12 |
| CG2791 == FBgn0037533        | INC062H12 | -0.06 | 0.25 |
| ttk == FBgn0003870           | INC072C10 | -0.06 | 0.14 |



## Table2S\_Sun\_Cline

|                              |           |       |      |
|------------------------------|-----------|-------|------|
| Cyp6a2 == FBgn0000473        | INC155H05 | -0.06 | 0.09 |
| CG5630 == FBgn0038842        | INC119H04 | -0.06 | 0.14 |
| argos == FBgn0004569         | INC071B08 | -0.06 | 0.21 |
| sdt == FBgn0003349           | INC052E03 | -0.06 | 0.10 |
| CG15715 == FBgn0036538       | INC142A01 | -0.06 | 0.12 |
| sop == FBgn0004867           | INC049E01 | -0.06 | 0.27 |
| kto == FBgn0001324           | INC025E08 | -0.06 | 0.07 |
| ATP synthase FO subunit 6    | INC153A07 | -0.06 | 0.21 |
| CG3662 == FBgn0031285        | INC022E10 | -0.06 | 0.25 |
| CG15720 == FBgn0030442       | INC154F02 | -0.06 | 0.08 |
| CG15067 == FBgn0034331       | INC019G12 | -0.06 | 0.17 |
| Bka == FBgn0010520           | INC071A02 | -0.06 | 0.14 |
| CG4094 == FBgn0029889        | INC135C11 | -0.06 | 0.16 |
| CG32656 == FBgn0052656       | INC017H05 | -0.06 | 0.13 |
| rpkl == FBgn0022981          | INC077A12 | -0.06 | 0.14 |
| ebi == FBgn0023444           | INC046F01 | -0.06 | 0.25 |
| CG6391 == FBgn0036111        | INC081E09 | -0.06 | 0.15 |
| CG32843 == FBgn0052843       | INC145C08 | -0.06 | 0.17 |
| CG17622 == FBgn0038998       | INC153C08 | -0.06 | 0.16 |
| CG10340 == FBgn0022344       | INC037G04 | -0.06 | 0.21 |
| CG6668 == FBgn0039213        | INC008D04 | -0.06 | 0.08 |
| CG1789 == FBgn0030063        | INC126F12 | -0.06 | 0.11 |
| CG12701 == FBgn0031071       | INC072F03 | -0.06 | 0.16 |
| qkr58E-2 == FBgn0022985      | INC103G05 | -0.06 | 0.16 |
| CG13512 == FBgn0034760       | INC122B04 | -0.06 | 0.14 |
| CG30069 == FBgn0050069       | INC049F02 | -0.06 | 0.13 |
| cac == FBgn0005563           | INC039F02 | -0.06 | 0.13 |
| Bj1 == FBgn0002638           | INC098D11 | -0.06 | 0.23 |
| CG3800 == FBgn0034802        | INC043A12 | -0.06 | 0.26 |
| CG9354 == FBgn0037686        | INC155H02 | -0.06 | 0.15 |
| rexin == FBgn0033504         | INC008E02 | -0.06 | 0.27 |
| UBL3 == FBgn0026076          | INC032G02 | -0.06 | 0.24 |
| CG31302 == FBgn0051302       | INC019F05 | -0.06 | 0.18 |
| Cpr == FBgn0015623           | INC036G11 | -0.05 | 0.15 |
| HDAC6 == FBgn0026428         | INC010A05 | -0.05 | 0.12 |
| unc-119 == FBgn0025549       | INC065F10 | -0.05 | 0.15 |
| EG:80H7.5 == FBgn0025381     | INC010D09 | -0.05 | 0.09 |
| CG3226 == FBgn0029882        | INC094A09 | -0.05 | 0.16 |
| CG12299 == FBgn0032295       | INC089A08 | -0.05 | 0.09 |
| CG15104 == FBgn0034410       | INC155G09 | -0.05 | 0.17 |
| CG1764 == FBgn0030467        | INC110E04 | -0.05 | 0.39 |
| EG:63B12.7 == FBgn0023514    | INC052E07 | -0.05 | 0.17 |
| CG5323 == FBgn0034362        | INC119D10 | -0.05 | 0.14 |
| CG15093 == FBgn0034390       | INC020C10 | -0.05 | 0.06 |
| CG17202 == FBgn0038043       | INC008C04 | -0.05 | 0.42 |
| CG40010 == FBgn0058010       | INC092G07 | -0.05 | 0.20 |
| CG12740 == FBgn0035422       | INC137H08 | -0.05 | 0.14 |
| CG12054 == FBgn0039831       | INC003D11 | -0.05 | 0.10 |
| CG3408 == FBgn0036008        | INC119F06 | -0.05 | 0.17 |
| neb == FBgn0004374           | INC041G08 | -0.05 | 0.06 |
| Motor-protein == FBgn0019960 | INC033D12 | -0.05 | 0.25 |
| CG7958 == FBgn0036103        | INC120D06 | -0.05 | 0.30 |
| CG9248 == FBgn0032923        | INC065G08 | -0.05 | 0.19 |
| CG7380 == FBgn0031977        | INC123A12 | -0.05 | 0.27 |
| CG14129 == FBgn0036216       | INC009C02 | -0.05 | 0.08 |
| tai == FBgn0041092           | INC030G02 | -0.05 | 0.14 |
| Sox21b == FBgn0042630        | INC095G04 | -0.05 | 0.22 |
| I(2)03709 == FBgn0010551     | INC109E08 | -0.05 | 0.14 |
| Pfrx == FBgn0027621          | INC033G04 | -0.05 | 0.28 |
| CG12538 == FBgn0038157       | INC094A08 | -0.05 | 0.16 |
| SeIR == FBgn0037847          | INC102A08 | -0.05 | 0.08 |
| EG:131F2.2 == FBgn0024988    | INC124C06 | -0.05 | 0.23 |
| BcDNA:LD32788 == FBgn0027493 | INC116F05 | -0.05 | 0.12 |

## Table2S\_Sun\_Cline

|                               |           |       |      |
|-------------------------------|-----------|-------|------|
| kl-5 == FBgn0001315           | INC153D07 | -0.05 | 0.10 |
| Pdk == FBgn0017558            | INC098G05 | -0.05 | 0.28 |
| yps == FBgn0022959            | INC049F05 | -0.05 | 0.21 |
| CG4692 == FBgn0035032         | INC136D11 | -0.05 | 0.17 |
| CT34211                       | INC102D10 | -0.05 | 0.19 |
| CG4000 == FBgn0038820         | INC026A07 | -0.05 | 0.11 |
| CG17108 == FBgn0032285        | INC002A12 | -0.05 | 0.32 |
| CG13290 == FBgn0035654        | INC115G12 | -0.05 | 0.18 |
| SamDC == FBgn0019932          | INC147B06 | -0.05 | 0.10 |
| deltaCOP == FBgn0028969       | INC012C06 | -0.05 | 0.26 |
| Abd-B == FBgn0000015          | INC072G04 | -0.05 | 0.21 |
| Cdic == FBgn0013761           | INC141B08 | -0.05 | 0.17 |
| CG33111 == FBgn0053111        | INC127G12 | -0.05 | 0.22 |
| CG5746 == FBgn0039186         | INC120F10 | -0.05 | 0.12 |
| CG6028 == FBgn0038924         | INC014H03 | -0.05 | 0.24 |
| gcl == FBgn0005695            | INC057H03 | -0.05 | 0.20 |
| CG14218 == FBgn0031031        | INC008E01 | -0.05 | 0.09 |
| CG4133 == FBgn0031257         | INC060G01 | -0.05 | 0.26 |
| CG40289 == FBgn0058289        | INC149G06 | -0.05 | 0.14 |
| l(1)Bi == FBgn0001341         | INC032G04 | -0.05 | 0.19 |
| BG:DS00004.12 == FBgn0026566  | INC011G07 | -0.05 | 0.18 |
| Sas10 == FBgn0029755          | INC018D08 | -0.05 | 0.06 |
| tomosyn == FBgn0030412        | INC059H04 | -0.05 | 0.10 |
| Paip2 == FBgn0038100          | INC141H03 | -0.05 | 0.19 |
| CG4502 == FBgn0031896         | INC146H09 | -0.05 | 0.09 |
| Lk6 == FBgn0017581            | INC046C03 | -0.05 | 0.17 |
| Pof == FBgn0035047            | INC153C07 | -0.05 | 0.15 |
| CG13235 == FBgn0040766        | INC151C09 | -0.05 | 0.10 |
| BG:BACR48E02.4 == FBgn0028546 | INC032D06 | -0.05 | 0.18 |
| CG18347 == FBgn0037969        | INC156E03 | -0.05 | 0.27 |
| CG6617 == FBgn0030944         | INC039G05 | -0.05 | 0.11 |
| CG17593 == FBgn0031544        | INC009A06 | -0.05 | 0.19 |
| BcDNA:GH02833 == FBgn0027602  | INC006B07 | -0.05 | 0.14 |
| CG5802 == FBgn0038863         | INC094A04 | -0.05 | 0.21 |
| und == FBgn0025117            | INC006D12 | -0.05 | 0.17 |
| CG1078 == FBgn0037255         | INC021C11 | -0.05 | 0.23 |
| Rsf1 == FBgn0011305           | INC010G04 | -0.05 | 0.54 |
| CG12079 == FBgn0035404        | INC025F02 | -0.05 | 0.09 |
| Faf == FBgn0025608            | INC126G11 | -0.05 | 0.26 |
| CG15783 == FBgn0029772        | INC013H07 | -0.05 | 0.25 |
| CG33174 == FBgn0053174        | INC075E01 | -0.05 | 0.12 |
| rst == FBgn0003285            | INC057B05 | -0.05 | 0.22 |
| CG32611 == FBgn0052611        | INC054D12 | -0.05 | 0.16 |
| CG8057 == FBgn0033383         | INC096C01 | -0.05 | 0.13 |
| CG30132 == FBgn0050132        | INC040A05 | -0.05 | 0.23 |
| Tsp3A == FBgn0040334          | INC008E04 | -0.05 | 0.61 |
| CG4159 == FBgn0038811         | INC015E09 | -0.05 | 0.22 |
| CG30389 == FBgn0050389        | INC010H04 | -0.05 | 0.11 |
| TBPH == FBgn0025790           | INC020H10 | -0.05 | 0.23 |
| CG31419 == FBgn0051419        | INC154B02 | -0.05 | 0.05 |
| CG18316 == FBgn0033261        | INC103C03 | -0.05 | 0.15 |
| PpV == FBgn0003139            | INC093D04 | -0.05 | 0.13 |
| CG5694 == FBgn0032197         | INC054E10 | -0.05 | 0.21 |
| CG16817 == FBgn0037728        | INC027C06 | -0.05 | 0.39 |
| CG4046 == FBgn0034743         | INC151A07 | -0.05 | 0.12 |
| EG:140G11.5 == FBgn0040396    | INC151A06 | -0.05 | 0.18 |
| Wnt4 == FBgn0010453           | INC060A05 | -0.05 | 0.18 |
| CG3918 == FBgn0029873         | INC050A03 | -0.05 | 0.24 |
| CG11825 == FBgn0033519        | INC125H08 | -0.05 | 0.08 |
| CG17219 == FBgn0031494        | INC128D11 | -0.05 | 0.15 |
| CG6180 == FBgn0032453         | INC032F07 | -0.05 | 0.23 |
| CG14545 == FBgn0040602        | INC144F08 | -0.05 | 0.12 |
| dod == FBgn0015379            | INC152F04 | -0.05 | 0.10 |

## Table2S\_Sun\_Cline

|                              |           |       |      |
|------------------------------|-----------|-------|------|
| BG:DS07473.2 == FBgn0028515  | INC092B04 | -0.05 | 0.10 |
| ken == FBgn0011236           | INC041A10 | -0.05 | 0.20 |
| CG14542 == FBgn0039402       | INC038E03 | -0.05 | 0.13 |
| rn == FBgn0003263            | INC153G02 | -0.05 | 0.11 |
| Pka-R1 == FBgn0000275        | INC052E02 | -0.05 | 0.14 |
| CG10915 == FBgn0034308       | INC037D02 | -0.05 | 0.21 |
| CG1907 == FBgn0039674        | INC052C06 | -0.05 | 0.16 |
| RpL29 == FBgn0016726         | INC139B01 | -0.05 | 0.15 |
| mbf1 == FBgn0026208          | INC015D11 | -0.05 | 0.13 |
| ptc == FBgn0003892           | INC010D07 | -0.05 | 0.18 |
| bi == FBgn0000179            | INC154F03 | -0.05 | 0.05 |
| CG2017 == FBgn0037391        | INC062H06 | -0.05 | 0.21 |
| CG16758 == FBgn0035348       | INC001E08 | -0.05 | 0.19 |
| GstD1 == FBgn0001149         | INC062F01 | -0.05 | 0.20 |
| CG32479 == FBgn0052479       | INC099G07 | -0.05 | 0.24 |
| CG17737 == FBgn0035423       | INC106H06 | -0.05 | 0.23 |
| CG14441 == FBgn0029895       | INC053A04 | -0.05 | 0.12 |
| CG1893 == FBgn0035390        | INC032G06 | -0.05 | 0.21 |
| CG12128 == FBgn0033473       | INC003C03 | -0.04 | 0.17 |
| CG5094 == FBgn0032640        | INC157E08 | -0.04 | 0.07 |
| CG3420 == FBgn0033100        | INC144B05 | -0.04 | 0.16 |
| CG15432 == FBgn0031603       | INC112C09 | -0.04 | 0.10 |
| scf == FBgn0025682           | INC086A04 | -0.04 | 0.22 |
| BcDNA:LD21129 == FBgn0027537 | INC054G05 | -0.04 | 0.17 |
| CG13931 == FBgn0035258       | INC117H02 | -0.04 | 0.12 |
| CG13065 == FBgn0036590       | INC113D11 | -0.04 | 0.09 |
| Suchb == FBgn0029118         | INC035H05 | -0.04 | 0.18 |
| D1 == FBgn0000412            | INC062F03 | -0.04 | 0.16 |
| CT38621                      | INC104H01 | -0.04 | 0.50 |
| CklIbeta == FBgn0000259      | INC147F10 | -0.04 | 0.26 |
| CG8160 == FBgn0034011        | INC016A12 | -0.04 | 0.30 |
| CG31176 == FBgn0051176       | INC073D08 | -0.04 | 0.15 |
| CG32982 == FBgn0052982       | INC026E03 | -0.04 | 0.14 |
| CG7798 == FBgn0034092        | INC117E12 | -0.04 | 0.11 |
| CG1240 == FBgn0035370        | INC098H09 | -0.04 | 0.07 |
| RpL13 == FBgn0011272         | INC135G06 | -0.04 | 0.18 |
| e(y)1 == FBgn0000617         | INC124H08 | -0.04 | 0.23 |
| CG15295 == FBgn0030220       | INC048B02 | -0.04 | 0.25 |
| Unc-76 == FBgn0040395        | INC025H11 | -0.04 | 0.30 |
| CG15776 == FBgn0029782       | INC051G12 | -0.04 | 0.30 |
| mRpL49 == FBgn0030433        | INC059A10 | -0.04 | 0.10 |
| CG9870 == FBgn0031422        | INC077A10 | -0.04 | 0.11 |
| CG2245 == FBgn0039871        | INC100H11 | -0.04 | 0.15 |
| CG32676 == FBgn0052676       | INC112C08 | -0.04 | 0.12 |
| CG10268 == FBgn0032811       | INC037C06 | -0.04 | 0.23 |
| CG1984 == FBgn0037463        | INC031C12 | -0.04 | 0.21 |
| CG12683 == FBgn0040911       | INC136F12 | -0.04 | 0.17 |
| CT26818                      | INC036E07 | -0.04 | 0.44 |
| CG11763 == FBgn0033522       | INC021B09 | -0.04 | 0.17 |
| Rbp1-like == FBgn0030479     | INC117E04 | -0.04 | 0.31 |
| CG3419 == FBgn0035002        | INC093B01 | -0.04 | 0.26 |
| CG9850 == FBgn0034903        | INC076C11 | -0.04 | 0.21 |
| CG12206 == FBgn0029662       | INC054H05 | -0.04 | 0.23 |
| CG2467 == FBgn0030355        | INC100F02 | -0.04 | 0.25 |
| cpo == FBgn0000363           | INC054B02 | -0.04 | 0.24 |
| eIF-4a == FBgn0001942        | INC094G10 | -0.04 | 0.23 |
| CG5762 == FBgn0039190        | INC091D04 | -0.04 | 0.20 |
| zpg == FBgn0024177           | INC072H04 | -0.04 | 0.16 |
| SoxN == FBgn0029123          | INC154H01 | -0.04 | 0.13 |
| T-cp1 == FBgn0003676         | INC082B04 | -0.04 | 0.33 |
| CG5010 == FBgn0030821        | INC112D11 | -0.04 | 0.16 |
| CG2974 == FBgn0030178        | INC049H03 | -0.04 | 0.15 |
| CG6878 == FBgn0036488        | INC132H01 | -0.04 | 0.16 |

## Table2S\_Sun\_Cline

|                              |           |       |      |
|------------------------------|-----------|-------|------|
| glob1 == FBgn0027657         | INC059B08 | -0.04 | 0.16 |
| CG7979 == FBgn0035848        | INC068E04 | -0.04 | 0.09 |
| capt == FBgn0028388          | INC113C05 | -0.04 | 0.24 |
| fs(1)h == FBgn0004656        | INC154B01 | -0.04 | 0.11 |
| CT35534                      | INC149A04 | -0.04 | 0.18 |
| CG10943 == FBgn0036320       | INC069G06 | -0.04 | 0.37 |
| sqh == FBgn0003514           | INC030A05 | -0.04 | 0.23 |
| Transaldolase == FBgn0023477 | INC021F01 | -0.04 | 0.21 |
| pAbp == FBgn0003031          | INC141H07 | -0.04 | 0.13 |
| CG3940 == FBgn0037788        | INC037F06 | -0.04 | 0.09 |
| CG6513 == FBgn0036401        | INC142A07 | -0.04 | 0.22 |
| CG14214 == FBgn0031049       | INC010A03 | -0.04 | 0.26 |
| fau == FBgn0020439           | INC012H02 | -0.04 | 0.15 |
| Hr96 == FBgn0015240          | INC081H10 | -0.04 | 0.11 |
| CG32084 == FBgn0052084       | INC133C12 | -0.04 | 0.21 |
| CG32779 == FBgn0052779       | INC004G08 | -0.04 | 0.37 |
| CG6175 == FBgn0036152        | INC012H06 | -0.04 | 0.12 |
| fd3F == FBgn0061173          | INC007F10 | -0.04 | 0.41 |
| unc-13-4A == FBgn0035756     | INC032A08 | -0.04 | 0.12 |
| Pvf3 == FBgn0031889          | INC070A01 | -0.04 | 0.10 |
| Fur1 == FBgn0004509          | INC105D08 | -0.04 | 0.19 |
| CG6543 == FBgn0033879        | INC086D02 | -0.04 | 0.51 |
| ng2 == FBgn0010294           | INC120C07 | -0.04 | 0.09 |
| CG6719 == FBgn0037893        | INC108F03 | -0.04 | 0.09 |
| BEST:GH08269 == FBgn0045828  | INC039F12 | -0.04 | 0.07 |
| Syx1A == FBgn0013343         | INC027A08 | -0.04 | 0.13 |
| vig == FBgn0024183           | INC092D03 | -0.04 | 0.36 |
| br == FBgn0000210            | INC066F10 | -0.04 | 0.27 |
| CG16777 == FBgn0037694       | INC073B11 | -0.04 | 0.25 |
| sdt == FBgn0003349           | INC031G01 | -0.04 | 0.26 |
| CG31158 == FBgn0051158       | INC057F10 | -0.04 | 0.22 |
| CG13211 == FBgn0033613       | INC149B11 | -0.04 | 0.19 |
| CG8991 == FBgn0033654        | INC030C11 | -0.04 | 0.27 |
| CG31374 == FBgn0051374       | INC044E05 | -0.04 | 0.23 |
| CG7483 == FBgn0037573        | INC117F08 | -0.04 | 0.11 |
| CG8636 == FBgn0029629        | INC081G12 | -0.04 | 0.11 |
| Su(H) == FBgn0004837         | INC102E02 | -0.04 | 0.13 |
| Noa36 == FBgn0026400         | INC036B02 | -0.04 | 0.23 |
| CG31990 == FBgn0051990       | INC117B10 | -0.04 | 0.07 |
| CG32920 == FBgn0052920       | INC108E05 | -0.04 | 0.08 |
| SC35 == FBgn0040286          | INC145F04 | -0.04 | 0.14 |
| CG32352 == FBgn0052352       | INC149C07 | -0.04 | 0.16 |
| CG7808 == FBgn0039713        | INC109F09 | -0.04 | 0.12 |
| CG31183 == FBgn0051183       | INC065G11 | -0.04 | 0.13 |
| CG4005 == FBgn0034970        | INC105D11 | -0.04 | 0.26 |
| CG4111 == FBgn0029785        | INC135H10 | -0.04 | 0.19 |
| BcDNA:SD06613 == FBgn0046214 | INC019C09 | -0.04 | 0.29 |
| CG15316 == FBgn0030133       | INC153G12 | -0.04 | 0.15 |
| fs(1)h == FBgn0004656        | INC063E12 | -0.04 | 0.20 |
| jar == FBgn0011225           | INC007D01 | -0.04 | 0.11 |
| CG9153 == FBgn0035207        | INC081H11 | -0.04 | 0.18 |
| CG3891 == FBgn0035993        | INC155A05 | -0.04 | 0.44 |
| Pk61C == FBgn0020386         | INC120H01 | -0.04 | 0.37 |
| CG15489 == FBgn0032438       | INC125F01 | -0.04 | 0.12 |
| CG32022 == FBgn0052022       | INC010C08 | -0.04 | 0.17 |
| CG12897 == FBgn0033517       | INC156B11 | -0.03 | 0.17 |
| CG32654 == FBgn0052654       | INC091C01 | -0.03 | 0.22 |
| BcDNA:LD22087 == FBgn0027512 | INC070C09 | -0.03 | 0.27 |
| CSN6 == FBgn0028837          | INC046D06 | -0.03 | 0.18 |
| CG13277 == FBgn0032599       | INC032B08 | -0.03 | 0.34 |
| CG14199 == FBgn0040890       | INC158E09 | -0.03 | 0.10 |
| CG7519 == FBgn0037087        | INC016B02 | -0.03 | 0.16 |
| Cbl == FBgn0020224           | INC125E02 | -0.03 | 0.11 |

## Table2S\_Sun\_Cline

|                              |           |       |      |
|------------------------------|-----------|-------|------|
| ATPsyn-b == FBgn0019644      | INC117E08 | -0.03 | 0.14 |
| CG15731 == FBgn0030390       | INC054E05 | -0.03 | 0.12 |
| CaBP1 == FBgn0025678         | INC102H04 | -0.03 | 0.07 |
| U2af38 == FBgn0017457        | INC007E08 | -0.03 | 0.20 |
| crcl== FBgn0000370           | INC039B06 | -0.03 | 0.14 |
| CG7187 == FBgn0038580        | INC046C12 | -0.03 | 0.12 |
| Ate1 == FBgn0025720          | INC008G08 | -0.03 | 0.14 |
| Pdsw == FBgn0021967          | INC134D12 | -0.03 | 0.13 |
| ap == FBgn0000099            | INC085F09 | -0.03 | 0.11 |
| Rab4 == FBgn0016701          | INC031A08 | -0.03 | 0.15 |
| Mtch == FBgn0027786          | INC104G03 | -0.03 | 0.14 |
| Lsdpl == FBgn0039114         | INC138A07 | -0.03 | 0.10 |
| lin19 == FBgn0015509         | INC081E06 | -0.03 | 0.32 |
| CG1518 == FBgn0031149        | INC070H02 | -0.03 | 0.20 |
| Amph == FBgn0027356          | INC029H11 | -0.03 | 0.31 |
| CG15765 == FBgn0029814       | INC051F08 | -0.03 | 0.11 |
| CG33005 == FBgn0053005       | INC052F04 | -0.03 | 0.26 |
| Plap == FBgn0024314          | INC030H07 | -0.03 | 0.27 |
| CycD == FBgn0010315          | INC099B12 | -0.03 | 0.21 |
| CG8003 == FBgn0036096        | INC038F07 | -0.03 | 0.18 |
| lectin-29Ca == FBgn0040098   | INC042B01 | -0.03 | 0.22 |
| Roe1 == FBgn0014877          | INC012F06 | -0.03 | 0.12 |
| CG10997 == FBgn0030529       | INC078B01 | -0.03 | 0.09 |
| l(2)05070 == FBgn0010590     | INC025E03 | -0.03 | 0.19 |
| CG12856 == FBgn0033966       | INC120D05 | -0.03 | 0.12 |
| BcDNA:LD29885 == FBgn0027496 | INC068G05 | -0.03 | 0.09 |
| CG14100 == FBgn0036889       | INC041D05 | -0.03 | 0.25 |
| rk == FBgn0003255            | INC041B02 | -0.03 | 0.58 |
| CG14543 == FBgn0039404       | INC103B07 | -0.03 | 0.26 |
| RpS18 == FBgn0010411         | INC118G02 | -0.03 | 0.15 |
| CG10883 == FBgn0038781       | INC150E09 | -0.03 | 0.09 |
| CG5773 == FBgn0034290        | INC036F08 | -0.03 | 0.17 |
| CG12443 == FBgn0033652       | INC066H11 | -0.03 | 0.21 |
| up == FBgn0004169            | INC126F09 | -0.03 | 0.28 |
| CG4598 == FBgn0032160        | INC016H09 | -0.03 | 0.21 |
| CG5620 == FBgn0036268        | INC154B03 | -0.03 | 0.11 |
| BG:DS00180.3 == FBgn0028544  | INC009D06 | -0.03 | 0.46 |
| Pglym78 == FBgn0014869       | INC084E01 | -0.03 | 0.18 |
| Hmx == FBgn0014858           | INC064D11 | -0.03 | 0.10 |
| CG14427 == FBgn0029931       | INC045A06 | -0.03 | 0.30 |
| CG10543 == FBgn0034570       | INC089H08 | -0.03 | 0.14 |
| CG7010 == FBgn0029721        | INC113D08 | -0.03 | 0.13 |
| fz == FBgn0001085            | INC098A08 | -0.03 | 0.09 |
| CG7263 == FBgn0031392        | INC035C07 | -0.03 | 0.09 |
| CG32701 == FBgn0052701       | INC030G04 | -0.03 | 0.07 |
| EG:BACR37P7.5 == FBgn0040371 | INC128F08 | -0.03 | 0.16 |
| RpL14 == FBgn0017579         | INC136H03 | -0.03 | 0.12 |
| CG1397 == FBgn0030275        | INC119B10 | -0.03 | 0.13 |
| tra2 == FBgn0003742          | INC046H04 | -0.03 | 0.29 |
| CG3663 == FBgn0035044        | INC116B09 | -0.03 | 0.09 |
| CG9686 == FBgn0030158        | INC104C02 | -0.03 | 0.21 |
| rabphilin-3A == FBgn0030230  | INC040G06 | -0.03 | 0.19 |
| mRpS6 == FBgn0035534         | INC113A09 | -0.03 | 0.20 |
| RpS27A == FBgn0003942        | INC145B04 | -0.03 | 0.13 |
| CG12068 == FBgn0039695       | INC039D03 | -0.03 | 0.13 |
| CG8816 == FBgn0033754        | INC116G11 | -0.03 | 0.13 |
| CG18375 == FBgn0034606       | INC050B11 | -0.03 | 0.12 |
| CG9525 == FBgn0032080        | INC068A02 | -0.03 | 0.33 |
| EftuM == FBgn0024556         | INC021A11 | -0.03 | 0.25 |
| CG8426 == FBgn0033029        | INC100A05 | -0.03 | 0.17 |
| CG8531 == FBgn0033918        | INC122F09 | -0.03 | 0.11 |
| CG7181 == FBgn0037097        | INC107F01 | -0.03 | 0.18 |
| Rl == FBgn0004636            | INC024H03 | -0.03 | 0.32 |

## Table2S\_Sun\_Cline

|                          |           |       |      |
|--------------------------|-----------|-------|------|
| CG12264 == FBgn0032393   | INC155H11 | -0.03 | 0.13 |
| CG15239 == FBgn0029681   | INC153H07 | -0.03 | 0.11 |
| CG10685 == FBgn0032762   | INC151G03 | -0.03 | 0.14 |
| CG15109 == FBgn0034416   | INC048B10 | -0.03 | 0.14 |
| CG2604 == FBgn0037298    | INC036H05 | -0.03 | 0.20 |
| EG:25E8.2 == FBgn0023528 | INC081E05 | -0.03 | 0.20 |
| CG12250 == FBgn0039345   | INC150E07 | -0.03 | 0.12 |
| CG4753 == FBgn0036622    | INC013E12 | -0.03 | 0.11 |
| CG10576 == FBgn0035630   | INC151H11 | -0.03 | 0.11 |
| CG5468 == FBgn0039434    | INC046B10 | -0.03 | 0.06 |
| CG14496 == FBgn0034297   | INC102D07 | -0.03 | 0.14 |
| Cyt-b5 == FBgn0033189    | INC006D01 | -0.03 | 0.19 |
| CG12321 == FBgn0038577   | INC050B01 | -0.03 | 0.19 |
| CCS == FBgn0010531       | INC089G10 | -0.03 | 0.17 |
| CG14650 == FBgn0037252   | INC043C11 | -0.03 | 0.27 |
| CG3544 == FBgn0031279    | INC042G05 | -0.03 | 0.18 |
| CG4058 == FBgn0038818    | INC042H04 | -0.03 | 0.10 |
| CG6020 == FBgn0037001    | INC017D05 | -0.03 | 0.20 |
| CG7006 == FBgn0039233    | INC016G02 | -0.03 | 0.18 |
| ds == FBgn0000497        | INC046B07 | -0.03 | 0.06 |
| acj6 == FBgn0000028      | INC100B12 | -0.03 | 0.21 |
| CG13674 == FBgn0035858   | INC142D08 | -0.03 | 0.10 |
| CG2444 == FBgn0030326    | INC153C04 | -0.03 | 0.17 |
| CG12610 == FBgn0052547   | INC014E04 | -0.03 | 0.19 |
| qm == FBgn0019662        | INC039A06 | -0.03 | 0.30 |
| grn == FBgn0001138       | INC048D03 | -0.03 | 0.30 |
| CG3278 == FBgn0032988    | INC152H12 | -0.03 | 0.08 |
| CG13045 == FBgn0036596   | INC026A09 | -0.03 | 0.37 |
| CG32278 == FBgn0052278   | INC098G08 | -0.03 | 0.22 |
| tko == FBgn0003714       | INC116A04 | -0.03 | 0.19 |
| La == FBgn0011638        | INC037D03 | -0.03 | 0.22 |
| CG1490 == FBgn0030366    | INC061E02 | -0.03 | 0.21 |
| TppII == FBgn0020370     | INC126B08 | -0.03 | 0.13 |
| CG32805 == FBgn0052805   | INC154C04 | -0.03 | 0.22 |
| run == FBgn0003300       | INC084G02 | -0.03 | 0.19 |
| CG32317 == FBgn0052317   | INC057A11 | -0.03 | 0.16 |
| CG3075 == FBgn0029905    | INC071F06 | -0.03 | 0.29 |
| tinc == FBgn0038554      | INC154D04 | -0.03 | 0.09 |
| pxt == FBgn0038538       | INC073H05 | -0.03 | 0.18 |
| Rbp2 == FBgn0010256      | INC136E03 | -0.03 | 0.11 |
| CG11151 == FBgn0030519   | INC011F11 | -0.03 | 0.15 |
| CG1421 == FBgn0032966    | INC042H01 | -0.03 | 0.14 |
| RpII33 == FBgn0026373    | INC092C01 | -0.03 | 0.09 |
| arm == FBgn0000117       | INC047A08 | -0.03 | 0.19 |
| sgg == FBgn0003371       | INC064B12 | -0.03 | 0.31 |
| Arf79F == FBgn0010348    | INC040B02 | -0.03 | 0.26 |
| Smr == FBgn0024308       | INC113H02 | -0.03 | 0.11 |
| CG11077 == FBgn0039930   | INC054D01 | -0.03 | 0.13 |
| CG32683 == FBgn0052683   | INC155C11 | -0.03 | 0.11 |
| RpL17A == FBgn0010078    | INC144A11 | -0.03 | 0.12 |
| ph-p == FBgn0004861      | INC152C09 | -0.03 | 0.23 |
| CG7520 == FBgn0035801    | INC082H02 | -0.03 | 0.04 |
| CG30296 == FBgn0050296   | INC048H12 | -0.03 | 0.38 |
| Nedd8 == FBgn0032725     | INC147A10 | -0.03 | 0.21 |
| Ccp84Ad == FBgn0004780   | INC156E06 | -0.03 | 0.48 |
| ade3 == FBgn0000053      | INC156B08 | -0.03 | 0.08 |
| CG17556 == FBgn0038462   | INC004A01 | -0.03 | 0.20 |
| CG8498 == FBgn0031992    | INC152G09 | -0.03 | 0.07 |
| CG8198 == FBgn0030677    | INC151C01 | -0.03 | 0.24 |
| CG6340 == FBgn0030648    | INC151A01 | -0.02 | 0.23 |
| Trx-2 == FBgn0040070     | INC051H07 | -0.02 | 0.15 |
| CG4619 == FBgn0032166    | INC084B08 | -0.02 | 0.27 |
| p53 == FBgn0039044       | INC121D12 | -0.02 | 0.03 |

## Table2S\_Sun\_Cline

|                              |           |       |      |
|------------------------------|-----------|-------|------|
| enok == FBgn0034975          | INC027E02 | -0.02 | 0.18 |
| CG15433 == FBgn0031604       | INC014G03 | -0.02 | 0.13 |
| Pk92B == FBgn0014006         | INC064B11 | -0.02 | 0.17 |
| CT35160                      | INC133A11 | -0.02 | 0.31 |
| CG13379 == FBgn0036804       | INC099H10 | -0.02 | 0.25 |
| CG15870 == FBgn0033798       | INC116F11 | -0.02 | 0.14 |
| comm2 == FBgn0041160         | INC112G02 | -0.02 | 0.08 |
| EG:8D8.6 == FBgn0024362      | INC038D07 | -0.02 | 0.24 |
| CG40199 == FBgn0058199       | INC098D05 | -0.02 | 0.15 |
| Sec61beta == FBgn0010638     | INC017A09 | -0.02 | 0.20 |
| Rpn11 == FBgn0028694         | INC027E08 | -0.02 | 0.12 |
| Mnt == FBgn0023215           | INC073F08 | -0.02 | 0.50 |
| CG4069 == FBgn0036301        | INC046C02 | -0.02 | 0.23 |
| CG31203 == FBgn0051203       | INC025F01 | -0.02 | 0.21 |
| wupA == FBgn0004028          | INC113H04 | -0.02 | 0.13 |
| Scs-fp == FBgn0017539        | INC020H09 | -0.02 | 0.10 |
| CG9091 == FBgn0030616        | INC121F10 | -0.02 | 0.33 |
| CG11089 == FBgn0039241       | INC029D08 | -0.02 | 0.45 |
| CG3560 == FBgn0030733        | INC119E11 | -0.02 | 0.06 |
| CG9080 == FBgn0033593        | INC127F01 | -0.02 | 0.21 |
| CG32432 == FBgn0052432       | INC156H12 | -0.02 | 0.08 |
| slgA == FBgn0003423          | INC042G09 | -0.02 | 0.23 |
| CG8231 == FBgn0030681        | INC005H09 | -0.02 | 0.18 |
| Pros54 == FBgn0015283        | INC064E10 | -0.02 | 0.12 |
| CG33091 == FBgn0053091       | INC158E02 | -0.02 | 0.10 |
| CG32597 == FBgn0052597       | INC025B08 | -0.02 | 0.11 |
| sina == FBgn0003410          | INC051F09 | -0.02 | 0.10 |
| Pgj == FBgn0003074           | INC009C12 | -0.02 | 0.26 |
| RpS9 == FBgn0010408          | INC120G05 | -0.02 | 0.11 |
| BcDNA:LD24014 == FBgn0046222 | INC053C01 | -0.02 | 0.16 |
| side == FBgn0016061          | INC152G01 | -0.02 | 0.19 |
| Rs1 == FBgn0021995           | INC020E09 | -0.02 | 0.08 |
| CG11885 == FBgn0031253       | INC118F08 | -0.02 | 0.12 |
| rap == FBgn0003200           | INC061H09 | -0.02 | 0.29 |
| mRpL3a == FBgn0030552        | INC121C08 | -0.02 | 0.12 |
| CG9399 == FBgn0037715        | INC111D10 | -0.02 | 0.05 |
| CG16758 == FBgn0035348       | INC095H08 | -0.02 | 0.19 |
| CG18731 == FBgn0042213       | INC109A07 | -0.02 | 0.11 |
| CG33113 == FBgn0053113       | INC118F10 | -0.02 | 0.09 |
| CG32084 == FBgn0052084       | INC147B05 | -0.02 | 0.10 |
| noi == FBgn0014366           | INC084B07 | -0.02 | 0.23 |
| CG4710 == FBgn0031303        | INC136D10 | -0.02 | 0.11 |
| put == FBgn0003169           | INC075A08 | -0.02 | 0.10 |
| CT34824                      | INC153G07 | -0.02 | 0.13 |
| RpL23a == FBgn0026372        | INC018D11 | -0.02 | 0.17 |
| CG1620 == FBgn0033183        | INC033E11 | -0.02 | 0.21 |
| CycT == FBgn0025455          | INC068D03 | -0.02 | 0.15 |
| Syb == FBgn0003660           | INC138H03 | -0.02 | 0.08 |
| CG10563 == FBgn0032760       | INC093B05 | -0.02 | 0.11 |
| CG14222 == FBgn0031043       | INC134D09 | -0.02 | 0.13 |
| Arf79F == FBgn0010348        | INC097A01 | -0.02 | 0.16 |
| axo == FBgn0026729           | INC102D11 | -0.02 | 0.22 |
| yin == FBgn0015565           | INC081F05 | -0.02 | 0.22 |
| Arf51F == FBgn0013750        | INC092B08 | -0.02 | 0.09 |
| NADH dehydrogenase subunit 1 | INC153A02 | -0.02 | 0.23 |
| mor == FBgn0002783           | INC156B05 | -0.02 | 0.05 |
| Pabp2 == FBgn0005648         | INC029A11 | -0.02 | 0.30 |
| CG3446 == FBgn0029868        | INC033G02 | -0.02 | 0.19 |
| CG8885 == FBgn0031656        | INC118A06 | -0.02 | 0.15 |
| CG6693 == FBgn0037878        | INC154A05 | -0.02 | 0.12 |
| trio == FBgn0024277          | INC020E07 | -0.02 | 0.10 |
| Qm == FBgn0024733            | INC145F01 | -0.02 | 0.12 |
| CG31551 == FBgn0051551       | INC068H04 | -0.02 | 0.17 |

## Table2S\_Sun\_Cline

|                                   |           |       |      |
|-----------------------------------|-----------|-------|------|
| 26-29kD-proteinase == FBgn0028967 | INC006A04 | -0.02 | 0.18 |
| CG14612 == FBgn0040670            | INC147C01 | -0.02 | 0.09 |
| CG4233 == FBgn0031380             | INC037E01 | -0.02 | 0.13 |
| GstD2 == FBgn0010038              | INC037D08 | -0.02 | 0.08 |
| CG7911 == FBgn0039735             | INC122A06 | -0.02 | 0.15 |
| CG32486 == FBgn0052486            | INC147F06 | -0.02 | 0.08 |
| Aats-ile == FBgn0027086           | INC015H08 | -0.02 | 0.27 |
| TH1 == FBgn0010416                | INC121B04 | -0.02 | 0.12 |
| Grip128 == FBgn0026433            | INC039A02 | -0.02 | 0.02 |
| CG12726 == FBgn0030487            | INC153B04 | -0.02 | 0.29 |
| RpS25 == FBgn0010413              | INC126G03 | -0.02 | 0.09 |
| CG2947 == FBgn0029676             | INC019D08 | -0.02 | 0.09 |
| sesB == FBgn0003360               | INC089F12 | -0.02 | 0.20 |
| CG8223 == FBgn0037624             | INC118H08 | -0.02 | 0.18 |
| CG9691 == FBgn0030160             | INC109C04 | -0.02 | 0.29 |
| CG8282 == FBgn0032005             | INC115C08 | -0.02 | 0.21 |
| CG32774 == FBgn0052774            | INC020C06 | -0.02 | 0.11 |
| bic == FBgn0000181                | INC115E05 | -0.02 | 0.16 |
| CG15093 == FBgn0034390            | INC134A03 | -0.02 | 0.12 |
| hth == FBgn0001235                | INC153C01 | -0.02 | 0.09 |
| CG4404 == FBgn0030432             | INC056C06 | -0.02 | 0.08 |
| psq == FBgn0004399                | INC117D07 | -0.02 | 0.12 |
| CG18273 == FBgn0029525            | INC026G11 | -0.02 | 0.29 |
| CG12171 == FBgn0037354            | INC149F09 | -0.02 | 0.07 |
| Arf79F == FBgn0010348             | INC091G04 | -0.02 | 0.07 |
| Cam == FBgn0000253                | INC130E05 | -0.02 | 0.15 |
| eEF1delta == FBgn0032198          | INC036A01 | -0.02 | 0.21 |
| CG14103 == FBgn0036908            | INC002H03 | -0.02 | 0.31 |
| CG32767 == FBgn0052767            | INC030E08 | -0.02 | 0.09 |
| ppl == FBgn0027945                | INC141E02 | -0.02 | 0.13 |
| pit == FBgn0025140                | INC086C12 | -0.02 | 0.17 |
| CG32365 == FBgn0052365            | INC091B06 | -0.02 | 0.19 |
| CG7172 == FBgn0037102             | INC008G10 | -0.02 | 0.14 |
| Obp99c == FBgn0039682             | INC009E10 | -0.02 | 0.09 |
| CG32699 == FBgn0052699            | INC051G10 | -0.02 | 0.19 |
| CG1919 == FBgn0035281             | INC120D11 | -0.02 | 0.14 |
| BcDNA:LD22118 == FBgn0026575      | INC157C01 | -0.02 | 0.19 |
| CG14541 == FBgn0039399            | INC103B06 | -0.02 | 0.28 |
| vvf == FBgn0003995                | INC009H02 | -0.02 | 0.07 |
| 14-3-3epsilon == FBgn0020238      | INC069G01 | -0.02 | 0.19 |
| CG9053 == FBgn0030606             | INC032H07 | -0.02 | 0.11 |
| Mpcp == FBgn0026409               | INC128C08 | -0.02 | 0.10 |
| CG9975 == FBgn0034435             | INC053B08 | -0.02 | 0.19 |
| CG12009 == FBgn0035430            | INC094F06 | -0.02 | 0.62 |
| Eip74EF == FBgn0000567            | INC038A09 | -0.02 | 0.11 |
| CG31305 == FBgn0051305            | INC145F07 | -0.02 | 0.14 |
| CG12428 == FBgn0039543            | INC069D06 | -0.02 | 0.10 |
| CG10077 == FBgn0035720            | INC014E09 | -0.01 | 0.22 |
| CG18646 == FBgn0030444            | INC027F08 | -0.01 | 0.30 |
| Crk == FBgn0024811                | INC108A07 | -0.01 | 0.19 |
| CG13227 == FBgn0033589            | INC128F05 | -0.01 | 0.11 |
| I(3)82Fd == FBgn0013576           | INC001F01 | -0.01 | 0.17 |
| stg == FBgn0003525                | INC105B07 | -0.01 | 0.09 |
| CG6540 == FBgn0030943             | INC120F05 | -0.01 | 0.13 |
| Dox-A2 == FBgn0000486             | INC085B11 | -0.01 | 0.09 |
| hoip == FBgn0015393               | INC130E08 | -0.01 | 0.10 |
| BcDNA:LD28247 == FBgn0027498      | INC097H08 | -0.01 | 0.05 |
| CG40281 == FBgn0058281            | INC101C06 | -0.01 | 0.18 |
| CG30387 == FBgn0050387            | INC116A03 | -0.01 | 0.13 |
| CG5703 == FBgn0030853             | INC010C04 | -0.01 | 0.24 |
| BEST:LP03871 == FBgn0043455       | INC059D05 | -0.01 | 0.18 |
| HP1b == FBgn0030082               | INC030H08 | -0.01 | 0.35 |
| Ospb == FBgn0020626               | INC049D08 | -0.01 | 0.12 |



## Table2S\_Sun\_Cline

|                              |           |       |      |
|------------------------------|-----------|-------|------|
| CG6838 == FBgn0037182        | INC105E09 | -0.01 | 0.22 |
| CG4364 == FBgn0032138        | INC011B05 | -0.01 | 0.15 |
| dlg1 == FBgn0001624          | INC085D04 | -0.01 | 0.20 |
| CG6597 == FBgn0036967        | INC102A12 | -0.01 | 0.15 |
| RpL27A == FBgn0010410        | INC112G01 | -0.01 | 0.11 |
| CG4658 == FBgn0032170        | INC032B11 | -0.01 | 0.08 |
| CrebB-17A == FBgn0014467     | INC107A12 | -0.01 | 0.16 |
| CG17198 == FBgn0039366       | INC154H11 | -0.01 | 0.12 |
| CG9282 == FBgn0032518        | INC006H08 | -0.01 | 0.14 |
| CG13298 == FBgn0035692       | INC151G06 | -0.01 | 0.21 |
| dnc == FBgn0000479           | INC154F01 | -0.01 | 0.08 |
| Rho1 == FBgn0014020          | INC059A08 | -0.01 | 0.14 |
| Alas == FBgn0020764          | INC019B04 | -0.01 | 0.12 |
| mRpL7-L12 == FBgn0011787     | INC023H03 | -0.01 | 0.14 |
| ph-d == FBgn0004860          | INC031E01 | -0.01 | 0.23 |
| CG11870 == FBgn0037804       | INC065H09 | -0.01 | 0.25 |
| CG14206 == FBgn0031035       | INC108A08 | -0.01 | 0.14 |
| CG2767 == FBgn0037537        | INC017D08 | -0.01 | 0.10 |
| myoglianin == FBgn0026199    | INC084B01 | -0.01 | 0.23 |
| CG4858 == FBgn0037011        | INC052B10 | -0.01 | 0.07 |
| CG7429 == FBgn0031979        | INC051G04 | -0.01 | 0.13 |
| REG == FBgn0029133           | INC047A02 | -0.01 | 0.15 |
| CadN2 == FBgn0032655         | INC054F03 | -0.01 | 0.30 |
| CG4038 == FBgn0011824        | INC153F02 | -0.01 | 0.11 |
| CG10139 == FBgn0033951       | INC017C06 | -0.01 | 0.15 |
| TfIIIEalpha == FBgn0015828   | INC154D07 | -0.01 | 0.07 |
| CG13630 == FBgn0039219       | INC019A02 | -0.01 | 0.11 |
| GstD3 == FBgn0010039         | INC121E12 | -0.01 | 0.12 |
| CG2616 == FBgn0037512        | INC064C12 | -0.01 | 0.09 |
| CG8331 == FBgn0033906        | INC143H07 | -0.01 | 0.12 |
| CG14204 == FBgn0031032       | INC107H12 | -0.01 | 0.17 |
| Pgk == FBgn0003075           | INC017F07 | -0.01 | 0.12 |
| CG31188 == FBgn0051188       | INC072G02 | -0.01 | 0.21 |
| BEST:LD07122 == FBgn0026582  | INC058D02 | -0.01 | 0.26 |
| BcDNA:GH06348 == FBgn0027580 | INC077E04 | -0.01 | 0.13 |
| CG14736 == FBgn0037986       | INC008B10 | -0.01 | 0.29 |
| CG12736 == FBgn0033184       | INC031C07 | -0.01 | 0.22 |
| CG8332 == FBgn0034138        | INC143H03 | -0.01 | 0.09 |
| a == FBgn0000008             | INC064D09 | -0.01 | 0.18 |
| CG14494 == FBgn0040740       | INC153H12 | -0.01 | 0.09 |
| CG9324 == FBgn0032884        | INC139B08 | -0.01 | 0.14 |
| EG:67A9.2 == FBgn0040394     | INC128G10 | -0.01 | 0.19 |
| Nmdar1 == FBgn0010399        | INC050A02 | -0.01 | 0.43 |
| alphaTub67C == FBgn0004236   | INC073B07 | -0.01 | 0.17 |
| CG9047 == FBgn0035075        | INC113C02 | -0.01 | 0.13 |
| CG6972 == FBgn0039008        | INC120D04 | -0.01 | 0.27 |
| Hsc70Cb == FBgn0026418       | INC085A08 | -0.01 | 0.15 |
| CG1354 == FBgn0030151        | INC098F09 | -0.01 | 0.14 |
| mmd == FBgn0041109           | INC084E05 | -0.01 | 0.28 |
| CG6340 == FBgn0030648        | INC026F11 | -0.01 | 0.16 |
| Pep == FBgn0004401           | INC120F09 | -0.01 | 0.26 |
| CG18131 == FBgn0031343       | INC125D06 | -0.01 | 0.12 |
| Sec61alpha == FBgn0026571    | INC038F01 | -0.01 | 0.15 |
| CG15027 == FBgn0030611       | INC013A11 | -0.01 | 0.18 |
| pdm2 == FBgn0004394          | INC019E11 | -0.01 | 0.21 |
| RpL3 == FBgn0020910          | INC031F10 | -0.01 | 0.23 |
| CG9973 == FBgn0035378        | INC014B05 | -0.01 | 0.14 |
| cype == FBgn0015031          | INC146F10 | -0.01 | 0.09 |
| l(2)k09913 == FBgn0021979    | INC150A07 | -0.01 | 0.18 |
| CG9269 == FBgn0038161        | INC007F05 | -0.01 | 0.13 |
| RpS6 == FBgn0004922          | INC069F05 | -0.01 | 0.13 |
| bru-2 == FBgn0043904         | INC066D01 | -0.01 | 0.29 |
| CG13494 == FBgn0034671       | INC118H01 | -0.01 | 0.16 |

## Table2S\_Sun\_Cline

|                              |           |       |      |
|------------------------------|-----------|-------|------|
| ldh == FBgn0001248           | INC045G08 | -0.01 | 0.13 |
| CG14639 == FBgn0037224       | INC007E02 | -0.01 | 0.26 |
| CG17385 == FBgn0033934       | INC037B10 | -0.01 | 0.18 |
| CG12870 == FBgn0039570       | INC015A11 | -0.01 | 0.12 |
| Ef1beta == FBgn0028737       | INC025B07 | -0.01 | 0.20 |
| psq == FBgn0004399           | INC109D08 | -0.01 | 0.21 |
| l(2)06225 == FBgn0010612     | INC028A05 | -0.01 | 0.18 |
| hbn == FBgn0008636           | INC145G02 | -0.01 | 0.17 |
| CG32675 == FBgn0052675       | INC016C05 | -0.01 | 0.83 |
| CG7987 == FBgn0038244        | INC096F02 | -0.01 | 0.18 |
| SsRbeta == FBgn0011016       | INC044G09 | -0.01 | 0.21 |
| CG11413 == FBgn0035022       | INC092A04 | -0.01 | 0.16 |
| mRpS17 == FBgn0034986        | INC045H10 | -0.01 | 0.23 |
| Aats-asp == FBgn0002069      | INC107G04 | -0.01 | 0.17 |
| Jafrac2 == FBgn0040308       | INC145G11 | -0.01 | 0.10 |
| His3.3A == FBgn0014857       | INC145A09 | -0.01 | 0.06 |
| CT39886                      | INC136E09 | -0.01 | 0.10 |
| CG9669 == FBgn0036667        | INC135A12 | -0.01 | 0.07 |
| CG12766 == FBgn0035476       | INC121D06 | -0.01 | 0.06 |
| Ant2 == FBgn0025111          | INC075B11 | -0.01 | 0.17 |
| CG1598 == FBgn0033191        | INC013B12 | -0.01 | 0.19 |
| CG9065 == FBgn0030610        | INC144E11 | -0.01 | 0.02 |
| CG17265 == FBgn0031488       | INC011B06 | -0.01 | 0.17 |
| mRpL22-24 == FBgn0037892     | INC118A07 | -0.01 | 0.11 |
| CG16820 == FBgn0032495       | INC029C07 | -0.01 | 0.18 |
| CG9914 == FBgn0030737        | INC018F10 | -0.01 | 0.10 |
| CG4882 == FBgn0025336        | INC084D04 | -0.01 | 0.14 |
| unc-13-4A == FBgn0035756     | INC157A06 | -0.01 | 0.14 |
| CG14519 == FBgn0039619       | INC121G02 | -0.01 | 0.12 |
| CG9953 == FBgn0035726        | INC120D10 | -0.01 | 0.12 |
| mRpL13 == FBgn0032720        | INC120E11 | -0.01 | 0.10 |
| CG11920 == FBgn0039274       | INC082B05 | -0.01 | 0.23 |
| CG3672 == FBgn0035985        | INC098A10 | -0.01 | 0.06 |
| CG8334 == FBgn0036913        | INC074F08 | -0.01 | 0.20 |
| gammaCop == FBgn0028968      | INC112A09 | -0.01 | 0.20 |
| CG1140 == FBgn0035298        | INC017C07 | -0.01 | 0.12 |
| CG12625 == FBgn0030282       | INC027E11 | -0.01 | 0.05 |
| SelG == FBgn0030350          | INC062B12 | -0.01 | 0.16 |
| nmd == FBgn0005322           | INC087B05 | -0.01 | 0.16 |
| l(3)03670 == FBgn0010808     | INC032B01 | -0.01 | 0.14 |
| Pdi == FBgn0014002           | INC056A12 | -0.01 | 0.18 |
| CG32560 == FBgn0052560       | INC017C08 | -0.01 | 0.11 |
| CG31291 == FBgn0051291       | INC096C05 | -0.01 | 0.22 |
| Hsp83 == FBgn0001233         | INC052G09 | -0.01 | 0.41 |
| Pros35 == FBgn0003151        | INC088G03 | -0.01 | 0.11 |
| HLHm3 == FBgn0002609         | INC081B03 | -0.01 | 0.23 |
| EG:BACR25B3.4 == FBgn0040377 | INC117D12 | -0.01 | 0.10 |
| cranky == FBgn0039411        | INC129E11 | -0.01 | 0.12 |
| Nap1 == FBgn0015268          | INC006A10 | -0.01 | 0.16 |
| Oscp == FBgn0016691          | INC107E03 | -0.01 | 0.15 |
| dos == FBgn0016794           | INC123E07 | -0.01 | 0.14 |
| CG6388 == FBgn0032430        | INC054F11 | -0.01 | 0.10 |
| ng3 == FBgn0010295           | INC094B03 | -0.01 | 0.19 |
| BcDNA:LD21675 == FBgn0027521 | INC098F01 | -0.01 | 0.15 |
| CG8206 == FBgn0030679        | INC030E01 | -0.01 | 0.06 |
| CG8258 == FBgn0033342        | INC155A11 | -0.01 | 0.14 |
| CG9101 == FBgn0030622        | INC117E11 | -0.01 | 0.07 |
| CG11138 == FBgn0030400       | INC035E07 | -0.01 | 0.10 |
| CG15797 == FBgn0030115       | INC129E08 | -0.01 | 0.09 |
| Tim9a == FBgn0030480         | INC146E09 | -0.01 | 0.12 |
| CG3135 == FBgn0029901        | INC116F02 | -0.01 | 0.20 |
| CG3815 == FBgn0029861        | INC009C03 | 0.00  | 0.41 |
| mRpL52 == FBgn0033208        | INC107F06 | 0.00  | 0.09 |

## Table2S\_Sun\_Cline

|                               |           |      |      |
|-------------------------------|-----------|------|------|
| CG8954 == FBgn0019890         | INC008A10 | 0.00 | 0.14 |
| CG1756 == FBgn0030303         | INC125D09 | 0.00 | 0.22 |
| cenG1A == FBgn0028509         | INC020G11 | 0.00 | 0.24 |
| CG5924 == FBgn0032154         | INC053A01 | 0.00 | 0.14 |
| CG11555 == FBgn0031241        | INC086H10 | 0.00 | 0.15 |
| MAPk-Ak2 == FBgn0013987       | INC072C08 | 0.00 | 0.11 |
| pgc == FBgn0016053            | INC078A01 | 0.00 | 0.08 |
| slmb == FBgn0023423           | INC156F10 | 0.00 | 0.16 |
| CT12667                       | INC042H05 | 0.00 | 0.20 |
| CG16940 == FBgn0035111        | INC131A03 | 0.00 | 0.07 |
| CG9769 == FBgn0037270         | INC066E12 | 0.00 | 0.19 |
| BcDNA:GH06451 == FBgn0028492  | INC098A03 | 0.00 | 0.08 |
| CG7011 == FBgn0036489         | INC109G03 | 0.00 | 0.11 |
| lmg == FBgn0029004            | INC065F07 | 0.00 | 0.19 |
| Rpn12 == FBgn0028693          | INC081A11 | 0.00 | 0.22 |
| Rga == FBgn0017550            | INC155A09 | 0.00 | 0.33 |
| CG2852 == FBgn0034753         | INC001G09 | 0.00 | 0.11 |
| arm == FBgn0000117            | INC075H10 | 0.00 | 0.14 |
| Sry-delta == FBgn0003512      | INC067H11 | 0.00 | 0.18 |
| RpL32 == FBgn0002626          | INC119A12 | 0.00 | 0.19 |
| CG33174 == FBgn0053174        | INC136E11 | 0.00 | 0.17 |
| CG6454 == FBgn0039187         | INC036A07 | 0.00 | 0.18 |
| Rpn6 == FBgn0028689           | INC048A05 | 0.00 | 0.16 |
| CT33327                       | INC152A05 | 0.00 | 0.16 |
| CG13041 == FBgn0036605        | INC113D02 | 0.00 | 0.13 |
| CG8149 == FBgn0037700         | INC031A03 | 0.00 | 0.03 |
| CG12959 == FBgn0034019        | INC138E01 | 0.00 | 0.10 |
| CG1458 == FBgn0039653         | INC136D02 | 0.00 | 0.14 |
| CG12071 == FBgn0039808        | INC017A05 | 0.00 | 0.24 |
| brk == FBgn0024250            | INC123G04 | 0.00 | 0.33 |
| CT34118                       | INC087C11 | 0.00 | 0.29 |
| CG10472 == FBgn0035670        | INC117F12 | 0.00 | 0.11 |
| Cbp53E == FBgn0004580         | INC009B05 | 0.00 | 0.23 |
| Hmgs == FBgn0010611           | INC053C06 | 0.00 | 0.09 |
| CG10907 == FBgn0036207        | INC064E03 | 0.00 | 0.17 |
| cup == FBgn0000392            | INC124G01 | 0.00 | 0.12 |
| ng1 == FBgn0002933            | INC120E09 | 0.00 | 0.12 |
| Fdh == FBgn0011768            | INC039E05 | 0.00 | 0.13 |
| rin == FBgn0015778            | INC032F05 | 0.00 | 0.13 |
| Ngp == FBgn0034243            | INC093A05 | 0.00 | 0.12 |
| CG15697 == FBgn0038834        | INC113B08 | 0.00 | 0.20 |
| Hey == FBgn0027788            | INC013D07 | 0.00 | 0.17 |
| CG32264 == FBgn0052264        | INC056C04 | 0.00 | 0.12 |
| MTA1-like == FBgn0027951      | INC153D04 | 0.00 | 0.22 |
| CG32663 == FBgn0052663        | INC040E05 | 0.00 | 0.20 |
| yip6 == FBgn0040061           | INC105B09 | 0.00 | 0.10 |
| glec == FBgn0015229           | INC101H08 | 0.00 | 0.25 |
| CG14715 == FBgn0037930        | INC135E08 | 0.00 | 0.14 |
| BcDNA:GH10333 == FBgn0027553  | INC008D11 | 0.00 | 0.16 |
| CG5778 == FBgn0038930         | INC036G02 | 0.00 | 0.10 |
| CG4042 == FBgn0037018         | INC008C11 | 0.00 | 0.11 |
| still == FBgn0003527          | INC006C03 | 0.00 | 0.15 |
| Ac3 == FBgn0023416            | INC062B03 | 0.00 | 0.56 |
| BEST:CK02656 == FBgn0025683   | INC077A05 | 0.00 | 0.20 |
| CG14549 == FBgn0039403        | INC062E09 | 0.00 | 0.16 |
| CG2046 == FBgn0037378         | INC127C05 | 0.00 | 0.13 |
| BcDNA:GH03163 == FBgn0027598  | INC105F07 | 0.00 | 0.18 |
| CT22715                       | INC141B03 | 0.00 | 0.27 |
| EG:BACR43E12.5 == FBgn0040354 | INC095A04 | 0.00 | 0.14 |
| Gmer == FBgn0034794           | INC025A08 | 0.00 | 0.18 |
| CG14435 == FBgn0029911        | INC023B07 | 0.00 | 0.52 |
| sns == FBgn0024189            | INC156G07 | 0.00 | 0.14 |
| parkin == FBgn0041100         | INC021A12 | 0.00 | 0.09 |

## Table2S\_Sun\_Cline

|                              |           |      |      |
|------------------------------|-----------|------|------|
| crq == FBgn0015924           | INC042B04 | 0.00 | 0.08 |
| cher == FBgn0014141          | INC057B10 | 0.00 | 0.22 |
| janA == FBgn0001280          | INC141B06 | 0.00 | 0.08 |
| CG2961 == FBgn0030187        | INC003A10 | 0.00 | 0.36 |
| CG7920 == FBgn0039737        | INC040C03 | 0.00 | 0.10 |
| bt == FBgn0005666            | INC052C07 | 0.00 | 0.10 |
| CG15376 == FBgn0029692       | INC057D07 | 0.00 | 0.09 |
| ttk == FBgn0003870           | INC072C03 | 0.00 | 0.35 |
| CG8405 == FBgn0034071        | INC013B02 | 0.00 | 0.13 |
| cno == FBgn0000340           | INC045C02 | 0.00 | 0.50 |
| CT34907                      | INC139F11 | 0.00 | 0.06 |
| BicD == FBgn0000183          | INC105A05 | 0.00 | 0.16 |
| CG8495 == FBgn0037752        | INC095H04 | 0.00 | 0.12 |
| CG15316 == FBgn0030133       | INC134E07 | 0.00 | 0.23 |
| CG9667 == FBgn0037550        | INC012C11 | 0.00 | 0.09 |
| CG11015 == FBgn0031830       | INC135C06 | 0.00 | 0.21 |
| CG1648 == FBgn0033446        | INC013F04 | 0.00 | 0.74 |
| ssh == FBgn0029157           | INC035A07 | 0.00 | 0.23 |
| mRpL51 == FBgn0032053        | INC030D05 | 0.00 | 0.13 |
| CG3321 == FBgn0038224        | INC128F06 | 0.00 | 0.11 |
| CG10809 == FBgn0036052       | INC054G02 | 0.00 | 0.08 |
| CG31036 == FBgn0051036       | INC019A09 | 0.00 | 0.16 |
| CG4116 == FBgn0029649        | INC056H08 | 0.00 | 0.21 |
| CG7283 == FBgn0036213        | INC112F05 | 0.00 | 0.13 |
| sec13 == FBgn0024509         | INC049B03 | 0.00 | 0.11 |
| wal == FBgn0010516           | INC156A06 | 0.00 | 0.16 |
| l(2)k16503 == FBgn0021814    | INC038G11 | 0.00 | 0.13 |
| gammaTub23C == FBgn0004176   | INC033C10 | 0.00 | 0.05 |
| CG2691 == FBgn0030504        | INC007E11 | 0.00 | 0.07 |
| CG8782 == FBgn0036898        | INC080E05 | 0.00 | 0.19 |
| CG2493 == FBgn0032864        | INC155C12 | 0.00 | 0.18 |
| Lis1 == FBgn0015754          | INC094A10 | 0.00 | 0.21 |
| CG5989 == FBgn0017429        | INC016F11 | 0.00 | 0.13 |
| CG7319 == FBgn0036197        | INC065D08 | 0.00 | 0.10 |
| CG7424 == FBgn0031980        | INC141G05 | 0.00 | 0.10 |
| CG14619 == FBgn0031187       | INC002B01 | 0.00 | 0.21 |
| CG2803 == FBgn0035083        | INC113B01 | 0.00 | 0.18 |
| CG12769 == FBgn0033252       | INC021F09 | 0.00 | 0.31 |
| CG13881 == FBgn0035125       | INC087G06 | 0.00 | 0.13 |
| cact == FBgn0000250          | INC002C05 | 0.00 | 0.39 |
| Roc1b == FBgn0040291         | INC128C07 | 0.00 | 0.07 |
| su(w[a]) == FBgn0003638      | INC062G04 | 0.00 | 0.14 |
| CG6227 == FBgn0030631        | INC036E01 | 0.00 | 0.11 |
| eIF6 == FBgn0034915          | INC046E08 | 0.00 | 0.12 |
| CG18815 == FBgn0042138       | INC039D09 | 0.00 | 0.08 |
| l(2)37Cc == FBgn0002031      | INC131B03 | 0.00 | 0.15 |
| CG8277 == FBgn0035823        | INC090F07 | 0.00 | 0.17 |
| CG14851 == FBgn0038240       | INC109B11 | 0.00 | 0.23 |
| BcDNA:LD23634 == FBgn0028474 | INC056C01 | 0.00 | 0.24 |
| CG11175 == FBgn0034530       | INC064A06 | 0.00 | 0.23 |
| CG7738 == FBgn0033596        | INC116E05 | 0.00 | 0.71 |
| mnb == FBgn0002777           | INC025B01 | 0.00 | 0.16 |
| CG1542 == FBgn0039828        | INC023C03 | 0.00 | 0.16 |
| CG12175 == FBgn0030502       | INC007C08 | 0.00 | 0.45 |
| mtacp1 == FBgn0011361        | INC114D08 | 0.00 | 0.21 |
| l(2)04154 == FBgn0010567     | INC043F01 | 0.00 | 0.26 |
| EG:171D11.1 == FBgn0023537   | INC035E08 | 0.00 | 0.10 |
| EG:115C2.8 == FBgn0025634    | INC120C04 | 0.01 | 0.05 |
| CG5756 == FBgn0034301        | INC096C07 | 0.01 | 0.12 |
| RpL36 == FBgn0002579         | INC111A06 | 0.01 | 0.17 |
| fz == FBgn0001085            | INC086B08 | 0.01 | 0.33 |
| CG14326 == FBgn0038528       | INC124D12 | 0.01 | 0.19 |
| CG7772 == FBgn0030883        | INC128B11 | 0.01 | 0.16 |

## Table2S\_Sun\_Cline

|                            |           |      |      |
|----------------------------|-----------|------|------|
| sgl == FBgn0010851         | INC066E11 | 0.01 | 0.12 |
| Ef2b == FBgn0000559        | INC089G05 | 0.01 | 0.29 |
| beta-Spec == FBgn0003471   | INC005H12 | 0.01 | 0.18 |
| RnrS == FBgn0011704        | INC048D02 | 0.01 | 0.28 |
| porin == FBgn0004363       | INC124D06 | 0.01 | 0.30 |
| CG3849 == FBgn0036653      | INC031D03 | 0.01 | 0.21 |
| CG11089 == FBgn0039241     | INC155D11 | 0.01 | 0.17 |
| CG12537 == FBgn0038193     | INC032G11 | 0.01 | 0.29 |
| CG6607 == FBgn0039204      | INC105D02 | 0.01 | 0.07 |
| CG2862 == FBgn0031459      | INC113A12 | 0.01 | 0.19 |
| CG9752 == FBgn0034614      | INC062G05 | 0.01 | 0.24 |
| Nxt1 == FBgn0028411        | INC114B01 | 0.01 | 0.11 |
| CG7945 == FBgn0036505      | INC035F12 | 0.01 | 0.20 |
| Ufd1-like == FBgn0036136   | INC063A04 | 0.01 | 0.20 |
| eIF-4E == FBgn0015218      | INC107F02 | 0.01 | 0.18 |
| Dph5 == FBgn0024558        | INC064C05 | 0.01 | 0.10 |
| loco == FBgn0020278        | INC073H09 | 0.01 | 0.10 |
| sbb == FBgn0010575         | INC002F07 | 0.01 | 0.65 |
| CG9135 == FBgn0031769      | INC100C04 | 0.01 | 0.23 |
| kn == FBgn0001319          | INC081C07 | 0.01 | 0.37 |
| CG8080 == FBgn0033373      | INC096H01 | 0.01 | 0.13 |
| eIF2B-alpha == FBgn0039726 | INC145B02 | 0.01 | 0.16 |
| phyl == FBgn0013725        | INC040E08 | 0.01 | 0.23 |
| caz == FBgn0011571         | INC157C06 | 0.01 | 0.22 |
| CG9326 == FBgn0032885      | INC065E09 | 0.01 | 0.31 |
| CG32473 == FBgn0052473     | INC091G09 | 0.01 | 0.14 |
| Crc == FBgn0005585         | INC011E03 | 0.01 | 0.22 |
| CG5902 == FBgn0039136      | INC048G05 | 0.01 | 0.29 |
| osa == FBgn0003013         | INC084B10 | 0.01 | 0.14 |
| Dp == FBgn0011763          | INC055E09 | 0.01 | 0.11 |
| CG4169 == FBgn0036642      | INC012B08 | 0.01 | 0.14 |
| alpha-Spec == FBgn0003470  | INC075D01 | 0.01 | 0.20 |
| Nrx == FBgn0013997         | INC101D06 | 0.01 | 0.14 |
| RpS14a == FBgn0004403      | INC143E08 | 0.01 | 0.16 |
| mts == FBgn0004177         | INC039G04 | 0.01 | 0.13 |
| CG17266 == FBgn0033089     | INC031C01 | 0.01 | 0.34 |
| CG8993 == FBgn0035334      | INC134D06 | 0.01 | 0.15 |
| for == FBgn0000721         | INC027F09 | 0.01 | 0.07 |
| CG5017 == FBgn0039553      | INC115D11 | 0.01 | 0.14 |
| Actr13E == FBgn0011741     | INC002H01 | 0.01 | 0.12 |
| ppa == FBgn0020257         | INC051H04 | 0.01 | 0.14 |
| Cka == FBgn0044323         | INC025C05 | 0.01 | 0.23 |
| Rp11 == FBgn0019938        | INC023H04 | 0.01 | 0.23 |
| CG6115 == FBgn0040985      | INC120A06 | 0.01 | 0.17 |
| BtbVII == FBgn0012049      | INC037G08 | 0.01 | 0.15 |
| lap == FBgn0026210         | INC005G12 | 0.01 | 0.29 |
| pont == FBgn0040078        | INC094B11 | 0.01 | 0.12 |
| CG13527 == FBgn0034776     | INC158C04 | 0.01 | 0.12 |
| Nrx-1 == FBgn0038975       | INC064G05 | 0.01 | 0.23 |
| cathD == FBgn0029093       | INC022H04 | 0.01 | 0.13 |
| CG14432 == FBgn0029919     | INC145A11 | 0.01 | 0.12 |
| Bmcp == FBgn0036199        | INC125H04 | 0.01 | 0.16 |
| Rpn2 == FBgn0028692        | INC033B06 | 0.01 | 0.23 |
| Smn == FBgn0036641         | INC033F11 | 0.01 | 0.13 |
| Gprk2 == FBgn0004834       | INC077F09 | 0.01 | 0.10 |
| CG9410 == FBgn0033086      | INC009G01 | 0.01 | 0.09 |
| Med21 == FBgn0036811       | INC003D05 | 0.01 | 0.38 |
| dco == FBgn0002413         | INC083D05 | 0.01 | 0.14 |
| CG4133 == FBgn0031257      | INC154F11 | 0.01 | 0.12 |
| NC2beta == FBgn0028926     | INC091H11 | 0.01 | 0.16 |
| CG8663 == FBgn0032946      | INC150H10 | 0.01 | 0.22 |
| Incenp == FBgn0033156      | INC036H11 | 0.01 | 0.23 |
| CG17255 == FBgn0030205     | INC021A01 | 0.01 | 0.17 |

## Table2S\_Sun\_Cline

|                            |           |      |      |
|----------------------------|-----------|------|------|
| CG32306 == FBgn0052306     | INC091C07 | 0.01 | 0.15 |
| Nmd3 == FBgn0023542        | INC052E12 | 0.01 | 0.13 |
| Dis3 == FBgn0039183        | INC084G04 | 0.01 | 0.14 |
| RpL19 == FBgn0002607       | INC015E07 | 0.01 | 0.18 |
| CG3203 == FBgn0029897      | INC018G06 | 0.01 | 0.10 |
| CG14351 == FBgn0031349     | INC054D05 | 0.01 | 0.16 |
| CG1249 == FBgn0037434      | INC118D05 | 0.01 | 0.12 |
| CG11198 == FBgn0033246     | INC017E12 | 0.01 | 0.28 |
| RpS5 == FBgn0002590        | INC106C11 | 0.01 | 0.30 |
| CG31006 == FBgn0051006     | INC157A01 | 0.01 | 0.16 |
| Dip-B == FBgn0000454       | INC008A05 | 0.01 | 0.21 |
| CG5537 == FBgn0035639      | INC094H07 | 0.01 | 0.14 |
| Ranbp9 == FBgn0037894      | INC037D12 | 0.01 | 0.19 |
| RpS3A == FBgn0017545       | INC083H08 | 0.01 | 0.11 |
| Trl == FBgn0013263         | INC120A11 | 0.01 | 0.15 |
| DebB == FBgn0000426        | INC130E01 | 0.01 | 0.19 |
| sbb == FBgn0010575         | INC154G10 | 0.01 | 0.17 |
| CPTI == FBgn0027842        | INC108A09 | 0.01 | 0.09 |
| CG32611 == FBgn0052611     | INC157A09 | 0.01 | 0.15 |
| CG11190 == FBgn0030035     | INC030F10 | 0.01 | 0.10 |
| CG5953 == FBgn0032587      | INC058F03 | 0.01 | 0.10 |
| Rpd3 == FBgn0015805        | INC077C04 | 0.01 | 0.23 |
| porin == FBgn0004363       | INC119E05 | 0.01 | 0.10 |
| CG17776 == FBgn0040899     | INC132B12 | 0.01 | 0.20 |
| CG11208 == FBgn0034488     | INC068F05 | 0.01 | 0.08 |
| Ras85D == FBgn0003205      | INC076B01 | 0.01 | 0.33 |
| vas == FBgn0003970         | INC102E08 | 0.01 | 0.17 |
| CG5532 == FBgn0034902      | INC118F05 | 0.01 | 0.12 |
| CG14339 == FBgn0031301     | INC054B11 | 0.01 | 0.14 |
| CT40743                    | INC129D05 | 0.01 | 0.23 |
| eEF1delta == FBgn0032198   | INC064G06 | 0.01 | 0.19 |
| B52 == FBgn0004587         | INC111G02 | 0.01 | 0.08 |
| Eno == FBgn0000579         | INC090F09 | 0.01 | 0.12 |
| shu == FBgn0003401         | INC065B09 | 0.01 | 0.15 |
| CT32708                    | INC152E01 | 0.01 | 0.15 |
| RpS14a == FBgn0004403      | INC138A02 | 0.01 | 0.16 |
| CG13300 == FBgn0035699     | INC022A03 | 0.01 | 0.14 |
| CG13004 == FBgn0030797     | INC127E01 | 0.01 | 0.08 |
| CG32549 == FBgn0052549     | INC014E03 | 0.01 | 0.18 |
| CG6195 == FBgn0038723      | INC058C10 | 0.01 | 0.17 |
| Ly == FBgn0002573          | INC041F10 | 0.01 | 0.16 |
| qtc == FBgn0028572         | INC039B02 | 0.01 | 0.16 |
| CG14217 == FBgn0031030     | INC048F02 | 0.01 | 0.38 |
| CG13335 == FBgn0033857     | INC057H05 | 0.01 | 0.49 |
| CG32813 == FBgn0052813     | INC061G02 | 0.01 | 0.07 |
| CG31550 == FBgn0051550     | INC068B04 | 0.01 | 0.14 |
| CT29521                    | INC156A02 | 0.01 | 0.16 |
| CG2989 == FBgn0030171      | INC156G01 | 0.01 | 0.12 |
| CG6251 == FBgn0034118      | INC001F05 | 0.01 | 0.17 |
| EG:171D11.1 == FBgn0023537 | INC093H03 | 0.01 | 0.10 |
| CG31688 == FBgn0051688     | INC156F12 | 0.01 | 0.12 |
| CG1973 == FBgn0039692      | INC007A05 | 0.01 | 0.14 |
| CSN4 == FBgn0027054        | INC067H10 | 0.01 | 0.10 |
| CG3203 == FBgn0029897      | INC018F11 | 0.02 | 0.16 |
| CG33203 == FBgn0053203     | INC102G05 | 0.02 | 0.12 |
| CG10384 == FBgn0034731     | INC018B07 | 0.02 | 0.29 |
| CG9099 == FBgn0030802      | INC152C12 | 0.02 | 0.10 |
| Mst57Da == FBgn0011668     | INC144E03 | 0.02 | 0.20 |
| ftz-f1 == FBgn0001078      | INC155H03 | 0.02 | 0.18 |
| CG6459 == FBgn0034259      | INC119E02 | 0.02 | 0.14 |
| CG17107 == FBgn0032281     | INC122F06 | 0.02 | 0.22 |
| CG11523 == FBgn0037156     | INC071C03 | 0.02 | 0.26 |
| CG6178 == FBgn0039156      | INC054B05 | 0.02 | 0.33 |

## Table2S\_Sun\_Cline

|                              |           |      |      |
|------------------------------|-----------|------|------|
| CG9368 == FBgn0036890        | INC124C08 | 0.02 | 0.18 |
| CG4960 == FBgn0039371        | INC035A08 | 0.02 | 0.10 |
| RpL31 == FBgn0025286         | INC139F06 | 0.02 | 0.11 |
| CG13551 == FBgn0040660       | INC153G08 | 0.02 | 0.12 |
| dnc == FBgn0000479           | INC049F06 | 0.02 | 0.25 |
| eIF-2alpha == FBgn0004925    | INC127H12 | 0.02 | 0.13 |
| cib == FBgn0026084           | INC125D08 | 0.02 | 0.15 |
| CG7275 == FBgn0036500        | INC060D12 | 0.02 | 0.18 |
| l(2)k09913 == FBgn0021979    | INC073B04 | 0.02 | 0.18 |
| CG5362 == FBgn0032237        | INC082E08 | 0.02 | 0.20 |
| phr6-4 == FBgn0016054        | INC103G02 | 0.02 | 0.11 |
| Srp19 == FBgn0015298         | INC125D11 | 0.02 | 0.11 |
| CG9578 == FBgn0031094        | INC125F04 | 0.02 | 0.31 |
| Mct1 == FBgn0023549          | INC086D03 | 0.02 | 0.10 |
| cib == FBgn0026084           | INC125C08 | 0.02 | 0.13 |
| Fib == FBgn0003062           | INC025F09 | 0.02 | 0.08 |
| CT35683                      | INC140A11 | 0.02 | 0.28 |
| CG12393 == FBgn0031768       | INC089C11 | 0.02 | 0.34 |
| mRpS28 == FBgn0035374        | INC086G11 | 0.02 | 0.16 |
| CG7587 == FBgn0038523        | INC149A01 | 0.02 | 0.09 |
| eIF-5A == FBgn0034967        | INC149A12 | 0.02 | 0.14 |
| Cyt-c-p == FBgn0000409       | INC012B03 | 0.02 | 0.33 |
| CG5620 == FBgn0036268        | INC008D12 | 0.02 | 0.19 |
| VhaM9.7-2 == FBgn0028663     | INC111A09 | 0.02 | 0.26 |
| CG14290 == FBgn0038662       | INC134A09 | 0.02 | 0.12 |
| sno == FBgn0005410           | INC092E06 | 0.02 | 0.27 |
| RpL12 == FBgn0002611         | INC128E01 | 0.02 | 0.16 |
| CG8860 == FBgn0033691        | INC121B06 | 0.02 | 0.10 |
| CG9028 == FBgn0036389        | INC010A12 | 0.02 | 0.29 |
| vihar == FBgn0027936         | INC066H09 | 0.02 | 0.07 |
| BcDNA:GH04753 == FBgn0027590 | INC076C08 | 0.02 | 0.18 |
| RpS17 == FBgn0005533         | INC117C02 | 0.02 | 0.11 |
| CG11943 == FBgn0031078       | INC072F02 | 0.02 | 0.16 |
| CG13214 == FBgn0033603       | INC034D11 | 0.02 | 0.27 |
| SK == FBgn0029761            | INC052A12 | 0.02 | 0.09 |
| RpL9 == FBgn0015756          | INC134H11 | 0.02 | 0.10 |
| Arc70 == FBgn0039923         | INC074H11 | 0.02 | 0.10 |
| RpS15A == FBgn0010198        | INC010F09 | 0.02 | 0.14 |
| Obp99a == FBgn0039678        | INC036H02 | 0.02 | 0.19 |
| Hsp27 == FBgn0001226         | INC018A02 | 0.02 | 0.15 |
| CG6287 == FBgn0032350        | INC014H02 | 0.02 | 0.23 |
| CT34000                      | INC142C09 | 0.02 | 0.22 |
| Nop56 == FBgn0038964         | INC095D01 | 0.02 | 0.18 |
| sqd == FBgn0003498           | INC094A01 | 0.02 | 0.09 |
| CG5446 == FBgn0032429        | INC039C12 | 0.02 | 0.12 |
| BcDNA:LD21405 == FBgn0027528 | INC155G02 | 0.02 | 0.20 |
| CG14205 == FBgn0031034       | INC158C06 | 0.02 | 0.17 |
| CG5849 == FBgn0038897        | INC041A11 | 0.02 | 0.51 |
| CG12852 == FBgn0039573       | INC117A11 | 0.02 | 0.16 |
| CG11414 == FBgn0035024       | INC039E01 | 0.02 | 0.16 |
| Jheh1 == FBgn0010053         | INC068B02 | 0.02 | 0.12 |
| CG7768 == FBgn0036415        | INC097H02 | 0.02 | 0.07 |
| CG31453 == FBgn0051453       | INC095B04 | 0.02 | 0.26 |
| sds22 == FBgn0028992         | INC041B04 | 0.02 | 0.10 |
| CG18811 == FBgn0042134       | INC060H06 | 0.02 | 0.10 |
| shn == FBgn0003396           | INC008E07 | 0.02 | 0.25 |
| shil == FBgn0003392          | INC095D12 | 0.02 | 0.26 |
| hbn == FBgn0008636           | INC017C11 | 0.02 | 0.31 |
| CG12870 == FBgn0039570       | INC154F04 | 0.02 | 0.11 |
| RpS26 == FBgn0004413         | INC033E06 | 0.02 | 0.18 |
| ATPsyn-beta == FBgn0010217   | INC060B11 | 0.02 | 0.14 |
| trp == FBgn0003861           | INC061B06 | 0.02 | 0.26 |
| CG10969 == FBgn0036310       | INC074D02 | 0.02 | 0.11 |

## Table2S\_Sun\_Cline

|                                |           |      |      |
|--------------------------------|-----------|------|------|
| CG1244 == FBgn0035357          | INC158G08 | 0.02 | 0.13 |
| CG15353 == FBgn0040718         | INC153E06 | 0.02 | 0.19 |
| EG:80H7.11 == FBgn0026871      | INC008G02 | 0.02 | 0.18 |
| Pkc53E == FBgn0003091          | INC144D02 | 0.02 | 0.25 |
| Nf1 == FBgn0015269             | INC052F05 | 0.02 | 0.16 |
| CG15184 == FBgn0037459         | INC147C07 | 0.02 | 0.15 |
| mRpS16 == FBgn0033907          | INC144E06 | 0.02 | 0.11 |
| CG30020 == FBgn0050020         | INC039A01 | 0.02 | 0.22 |
| croI == FBgn0020309            | INC034E09 | 0.02 | 0.34 |
| ferrochelatase == FBgn0024891  | INC065E01 | 0.02 | 0.08 |
| RpL11 == FBgn0013325           | INC137G06 | 0.02 | 0.17 |
| sns == FBgn0024189             | INC021D12 | 0.02 | 0.06 |
| CG5094 == FBgn0032640          | INC083E12 | 0.02 | 0.12 |
| rexin == FBgn0033504           | INC108B07 | 0.02 | 0.15 |
| CG18811 == FBgn0042134         | INC057C02 | 0.02 | 0.12 |
| Pep == FBgn0004401             | INC027F10 | 0.02 | 0.10 |
| RpS12 == FBgn0014027           | INC115E11 | 0.02 | 0.12 |
| CG4884 == FBgn0039565          | INC030G01 | 0.02 | 0.10 |
| CG13337 == FBgn0033863         | INC095H03 | 0.02 | 0.34 |
| CG31368 == FBgn0051368         | INC008A12 | 0.02 | 0.08 |
| Rtc1 == FBgn0020909            | INC154F07 | 0.02 | 0.12 |
| CG10320 == FBgn0034645         | INC142D02 | 0.02 | 0.24 |
| SK == FBgn0029761              | INC052B04 | 0.02 | 0.17 |
| CG8663 == FBgn0032946          | INC140E02 | 0.02 | 0.21 |
| CG8664 == FBgn0030836          | INC028G10 | 0.02 | 0.27 |
| Rpb8 == FBgn0037121            | INC069H10 | 0.02 | 0.13 |
| CG6051 == FBgn0039492          | INC020H07 | 0.02 | 0.24 |
| Trap1 == FBgn0026761           | INC081B08 | 0.02 | 0.15 |
| CG13068 == FBgn0036588         | INC139E05 | 0.02 | 0.14 |
| Rpt4 == FBgn0028685            | INC143E01 | 0.02 | 0.07 |
| CG3436 == FBgn0031229          | INC078C01 | 0.02 | 0.20 |
| Ccp84Aa == FBgn0004783         | INC107F08 | 0.02 | 0.31 |
| f == FBgn0000630               | INC032E06 | 0.02 | 0.21 |
| CG11131 == FBgn0037204         | INC011F06 | 0.02 | 0.21 |
| CG3107 == FBgn0033005          | INC066F07 | 0.02 | 0.09 |
| Aats-ile == FBgn0027086        | INC016B03 | 0.02 | 0.17 |
| Scsalphal == FBgn0004888       | INC116H01 | 0.02 | 0.07 |
| CT35136                        | INC008F06 | 0.02 | 0.13 |
| grim == FBgn0015946            | INC107F10 | 0.02 | 0.15 |
| G-ialpha65A == FBgn0001104     | INC066D05 | 0.02 | 0.18 |
| BcDNA:LD21405 == FBgn0027528   | INC010G08 | 0.02 | 0.21 |
| Rab10 == FBgn0015789           | INC062F09 | 0.02 | 0.18 |
| CG18428 == FBgn0039149         | INC122C08 | 0.02 | 0.15 |
| CG4798 == FBgn0034213          | INC022G06 | 0.02 | 0.22 |
| cytochrome c oxidase subunit I | INC153A06 | 0.02 | 0.12 |
| CG14211 == FBgn0031044         | INC029H06 | 0.03 | 0.14 |
| Pros29 == FBgn0003150          | INC009G07 | 0.03 | 0.16 |
| CG9934 == FBgn0032467          | INC081B12 | 0.03 | 0.12 |
| BcDNA:GH07269 == FBgn0028490   | INC155D02 | 0.03 | 0.10 |
| CG10853 == FBgn0035478         | INC135H01 | 0.03 | 0.27 |
| CG3570 == FBgn0035035          | INC128D05 | 0.03 | 0.26 |
| sls == FBgn0003432             | INC035C05 | 0.03 | 0.09 |
| Set == FBgn0014879             | INC107G05 | 0.03 | 0.10 |
| Mer == FBgn0013951             | INC011G05 | 0.03 | 0.38 |
| CG18193 == FBgn0037579         | INC117H12 | 0.03 | 0.14 |
| BEST:CK01296 == FBgn0025700    | INC008C12 | 0.03 | 0.19 |
| CG13678 == FBgn0035859         | INC158A09 | 0.03 | 0.23 |
| CG13188 == FBgn0033668         | INC087B04 | 0.03 | 0.14 |
| Gp93 == FBgn0039562            | INC101A04 | 0.03 | 0.16 |
| CG8715 == FBgn0033253          | INC063D12 | 0.03 | 0.25 |
| CG14503 == FBgn0040737         | INC147E02 | 0.03 | 0.05 |
| Hsc70Cb == FBgn0026418         | INC091D05 | 0.03 | 0.21 |
| CG10084 == FBgn0032794         | INC019E12 | 0.03 | 0.15 |



## Table2S\_Sun\_Cline

|                              |           |      |      |
|------------------------------|-----------|------|------|
| CHES-1-like == FBgn0029504   | INC012F03 | 0.03 | 0.20 |
| stck == FBgn0020249          | INC035B09 | 0.03 | 0.17 |
| Ald == FBgn0000064           | INC052F11 | 0.03 | 0.33 |
| CG10597 == FBgn0030832       | INC098B09 | 0.03 | 0.20 |
| CG1785 == FBgn0030061        | INC126E08 | 0.03 | 0.06 |
| awd == FBgn0000150           | INC127B03 | 0.03 | 0.14 |
| AnnIX == FBgn0000083         | INC016A04 | 0.03 | 0.12 |
| AP-1sigma == FBgn0039132     | INC132F12 | 0.03 | 0.21 |
| CG8181 == FBgn0033361        | INC008H11 | 0.03 | 0.41 |
| CG7267 == FBgn0030079        | INC110C12 | 0.03 | 0.21 |
| CG11876 == FBgn0039635       | INC113H09 | 0.03 | 0.16 |
| Mad == FBgn0011648           | INC048F06 | 0.03 | 0.17 |
| eIF2B-gamma == FBgn0034029   | INC098C03 | 0.03 | 0.11 |
| BcDNA:GH04962 == FBgn0027588 | INC100A06 | 0.03 | 0.18 |
| CG3224 == FBgn0029885        | INC022E02 | 0.03 | 0.14 |
| eff == FBgn0011217           | INC115F07 | 0.03 | 0.35 |
| DebA == FBgn0000425          | INC146H01 | 0.03 | 0.08 |
| CG5829 == FBgn0038520        | INC039B08 | 0.03 | 0.21 |
| Tm1 == FBgn0003721           | INC114C08 | 0.03 | 0.31 |
| CG14207 == FBgn0031037       | INC109F01 | 0.03 | 0.23 |
| CG32137 == FBgn0052137       | INC031G11 | 0.03 | 0.50 |
| CG10741 == FBgn0036373       | INC010A07 | 0.03 | 0.50 |
| dac == FBgn0005677           | INC156B09 | 0.03 | 0.12 |
| CG13228 == FBgn0033588       | INC119A04 | 0.03 | 0.22 |
| Tm1 == FBgn0003721           | INC109F03 | 0.03 | 0.11 |
| CG13901 == FBgn0035164       | INC099F12 | 0.03 | 0.14 |
| CG12864 == FBgn0033946       | INC068B09 | 0.03 | 0.33 |
| CG11334 == FBgn0039849       | INC125C07 | 0.03 | 0.11 |
| EG:114D9.2 == FBgn0025641    | INC091F05 | 0.03 | 0.12 |
| dj == FBgn0019828            | INC078D03 | 0.03 | 0.29 |
| CG2789 == FBgn0031263        | INC063C07 | 0.03 | 0.22 |
| CG4440 == FBgn0040984        | INC137G04 | 0.03 | 0.13 |
| CG32465 == FBgn0052465       | INC100E04 | 0.03 | 0.21 |
| Gnf1 == FBgn0004913          | INC090C12 | 0.03 | 0.12 |
| Rpt1 == FBgn0028687          | INC098B10 | 0.03 | 0.09 |
| CG11859 == FBgn0039306       | INC058D07 | 0.03 | 0.25 |
| r- == FBgn0003257            | INC004B09 | 0.03 | 0.25 |
| RpL12 == FBgn0002611         | INC115D12 | 0.03 | 0.10 |
| tinc == FBgn0038554          | INC015D03 | 0.03 | 0.18 |
| CG32030 == FBgn0052030       | INC154H02 | 0.03 | 0.18 |
| CG7632 == FBgn0037071        | INC155C09 | 0.03 | 0.11 |
| Syn1 == FBgn0037130          | INC007D06 | 0.03 | 0.25 |
| Karybeta3 == FBgn0011341     | INC077E02 | 0.03 | 0.26 |
| CG14148 == FBgn0040821       | INC107B03 | 0.03 | 0.14 |
| Syx1A == FBgn0013343         | INC091G10 | 0.03 | 0.41 |
| nAcRalpha-34E == FBgn0028875 | INC008A06 | 0.03 | 0.16 |
| Nrv1 == FBgn0015776          | INC043C10 | 0.03 | 0.30 |
| CG14191 == FBgn0030981       | INC010H06 | 0.03 | 0.22 |
| Cks == FBgn0010314           | INC093A08 | 0.03 | 0.17 |
| aop == FBgn0000097           | INC081D04 | 0.03 | 0.21 |
| CG32560 == FBgn0052560       | INC133F08 | 0.03 | 0.25 |
| Sop2 == FBgn0001961          | INC009H10 | 0.03 | 0.17 |
| CG7324 == FBgn0037074        | INC060H07 | 0.03 | 0.19 |
| CG5317 == FBgn0032404        | INC002H02 | 0.03 | 0.21 |
| CG1275 == FBgn0035321        | INC098C01 | 0.03 | 0.21 |
| Clc == FBgn0024814           | INC011A06 | 0.03 | 0.18 |
| Gs2 == FBgn0001145           | INC013G01 | 0.03 | 0.14 |
| EG:BACH6115.1 == FBgn0026087 | INC036B08 | 0.03 | 0.32 |
| CG10638 == FBgn0036290       | INC099B03 | 0.03 | 0.24 |
| BG:DS01068.6 == FBgn0028529  | INC033A10 | 0.03 | 0.16 |
| CG33009 == FBgn0053009       | INC095B12 | 0.03 | 0.19 |
| CG7735 == FBgn0034446        | INC150D10 | 0.03 | 0.15 |
| CG17059 == FBgn0040754       | INC144C11 | 0.03 | 0.12 |

## Table2S\_Sun\_Cline

|                               |           |      |      |
|-------------------------------|-----------|------|------|
| Dsor1 == FBgn0010269          | INC015E01 | 0.03 | 0.13 |
| BG:DS01523.1 == FBgn0028906   | INC116B01 | 0.03 | 0.40 |
| CG14854 == FBgn0038238        | INC158C11 | 0.03 | 0.13 |
| CG32778 == FBgn0052778        | INC097F09 | 0.03 | 0.15 |
| CG18210 == FBgn0030636        | INC087B09 | 0.03 | 0.21 |
| dco == FBgn0002413            | INC052C09 | 0.03 | 0.22 |
| CG32514 == FBgn0052514        | INC075B08 | 0.03 | 0.21 |
| CG15098 == FBgn0034398        | INC139D08 | 0.03 | 0.12 |
| RpS14b == FBgn0004404         | INC022E08 | 0.03 | 0.09 |
| CG11984 == FBgn0037655        | INC103D02 | 0.03 | 0.11 |
| BcDNA:GH02901 == FBgn0027601  | INC028E09 | 0.03 | 0.13 |
| CG32675 == FBgn0052675        | INC147A08 | 0.03 | 0.09 |
| CG11267 == FBgn0036334        | INC115B03 | 0.03 | 0.11 |
| CG14852 == FBgn0038242        | INC012G04 | 0.03 | 0.20 |
| EG:171D11.5 == FBgn0023534    | INC113H01 | 0.03 | 0.12 |
| BcDNA:LD09009 == FBgn0027889  | INC054C10 | 0.03 | 0.18 |
| eve == FBgn0000606            | INC010B05 | 0.03 | 0.46 |
| CG8170 == FBgn0033365         | INC030E06 | 0.03 | 0.44 |
| RpL7A == FBgn0014026          | INC123D06 | 0.03 | 0.25 |
| spt4 == FBgn0028683           | INC142A10 | 0.03 | 0.16 |
| CG2052 == FBgn0039905         | INC096H02 | 0.03 | 0.12 |
| CG3702 == FBgn0031590         | INC098F03 | 0.03 | 0.11 |
| Mlf == FBgn0034051            | INC010E05 | 0.03 | 0.13 |
| CG7506 == FBgn0035805         | INC008B12 | 0.03 | 0.19 |
| bs == FBgn0004101             | INC157A05 | 0.03 | 0.24 |
| CG32716 == FBgn0052716        | INC013H12 | 0.03 | 0.20 |
| CG16779 == FBgn0037698        | INC115A07 | 0.03 | 0.13 |
| Elongin-C == FBgn0023211      | INC147F11 | 0.03 | 0.19 |
| CG7993 == FBgn0038585         | INC038G01 | 0.03 | 0.09 |
| CG32245 == FBgn0052245        | INC106H11 | 0.03 | 0.20 |
| Mp20 == FBgn0002789           | INC112E09 | 0.03 | 0.33 |
| CG3367 == FBgn0029871         | INC085F08 | 0.03 | 0.10 |
| M(2)21AB == FBgn0005278       | INC075A10 | 0.03 | 0.18 |
| CG6896 == FBgn0036801         | INC106H04 | 0.03 | 0.14 |
| skpA == FBgn0025637           | INC120B08 | 0.03 | 0.16 |
| shanti == FBgn0031260         | INC118F04 | 0.03 | 0.07 |
| CG4589 == FBgn0019886         | INC018D06 | 0.03 | 0.09 |
| CG10373 == FBgn0032704        | INC071D08 | 0.03 | 0.09 |
| eIF2B-delta == FBgn0034858    | INC068A03 | 0.04 | 0.08 |
| CG12236 == FBgn0029822        | INC008A08 | 0.04 | 0.13 |
| CG13679 == FBgn0035856        | INC114G10 | 0.04 | 0.15 |
| Rb97D == FBgn0004903          | INC048H09 | 0.04 | 0.19 |
| CG15764 == FBgn0029817        | INC051F07 | 0.04 | 0.09 |
| CG16807 == FBgn0036621        | INC080B04 | 0.04 | 0.19 |
| CG16762 == FBgn0035343        | INC112E02 | 0.04 | 0.09 |
| Int6 == FBgn0025582           | INC053B05 | 0.04 | 0.05 |
| CG5390 == FBgn0032213         | INC087A04 | 0.04 | 0.11 |
| CG3294 == FBgn0031628         | INC040C06 | 0.04 | 0.37 |
| CG13120 == FBgn0032142        | INC117C11 | 0.04 | 0.20 |
| CycJ == FBgn0010317           | INC099E05 | 0.04 | 0.14 |
| mRpL14 == FBgn0040389         | INC040D05 | 0.04 | 0.13 |
| EG:BACH59J11.2 == FBgn0040388 | INC021E03 | 0.04 | 0.30 |
| CanA-14F == FBgn0030758       | INC140G06 | 0.04 | 0.16 |
| CG15771 == FBgn0029801        | INC110F08 | 0.04 | 0.23 |
| CG32137 == FBgn0052137        | INC037F01 | 0.04 | 0.13 |
| CG8031 == FBgn0038110         | INC069G05 | 0.04 | 0.21 |
| CG13230 == FBgn0040764        | INC141A09 | 0.04 | 0.17 |
| RpS3 == FBgn0002622           | INC035D12 | 0.04 | 0.24 |
| CG6543 == FBgn0033879         | INC027F07 | 0.04 | 0.29 |
| drpr == FBgn0027594           | INC101B07 | 0.04 | 0.12 |
| CG10918 == FBgn0031178        | INC020D09 | 0.04 | 0.29 |
| Ubc-E2H == FBgn0029996        | INC117F10 | 0.04 | 0.18 |
| mam == FBgn0002643            | INC027G01 | 0.04 | 0.21 |

## Table2S\_Sun\_Cline

|                              |           |      |      |
|------------------------------|-----------|------|------|
| CG8025 == FBgn0036916        | INC039C01 | 0.04 | 0.11 |
| EG:BACR25B3.6 == FBgn0040375 | INC119H02 | 0.04 | 0.13 |
| CG6126 == FBgn0038407        | INC044B08 | 0.04 | 0.11 |
| Rox8 == FBgn0005649          | INC088B05 | 0.04 | 0.30 |
| CG30089 == FBgn0050089       | INC104G11 | 0.04 | 0.14 |
| eIF3-S9 == FBgn0034237       | INC084E03 | 0.04 | 0.22 |
| rept == FBgn0040075          | INC062H02 | 0.04 | 0.27 |
| nonA == FBgn0004227          | INC066A06 | 0.04 | 0.22 |
| SNF1A == FBgn0023169         | INC019E08 | 0.04 | 0.16 |
| CT35920                      | INC141G02 | 0.04 | 0.13 |
| Su(var)3-9 == FBgn0003600    | INC019A11 | 0.04 | 0.33 |
| CG10286 == FBgn0037439       | INC090C04 | 0.04 | 0.22 |
| CG3731 == FBgn0038271        | INC022D05 | 0.04 | 0.14 |
| Tsp2A == FBgn0024361         | INC039F01 | 0.04 | 0.13 |
| CG32394 == FBgn0052394       | INC072D07 | 0.04 | 0.36 |
| abd-A == FBgn0000014         | INC126A05 | 0.04 | 0.43 |
| Sox15 == FBgn0005613         | INC146E05 | 0.04 | 0.24 |
| CG4078 == FBgn0029798        | INC013B01 | 0.04 | 0.13 |
| Pp2A-29B == FBgn0005776      | INC056E05 | 0.04 | 0.17 |
| CG9876 == FBgn0034821        | INC115H10 | 0.04 | 0.22 |
| CG4686 == FBgn0038739        | INC125C09 | 0.04 | 0.20 |
| CG17994 == FBgn0033072       | INC155F05 | 0.04 | 0.08 |
| CrebA == FBgn0004396         | INC019G01 | 0.04 | 0.18 |
| Sh == FBgn0003380            | INC116C08 | 0.04 | 0.07 |
| CG6901 == FBgn0038414        | INC042E04 | 0.04 | 0.31 |
| lark == FBgn0011640          | INC065D11 | 0.04 | 0.12 |
| 14-3-3zeta == FBgn0004907    | INC136G12 | 0.04 | 0.18 |
| CG9715 == FBgn0036668        | INC058G08 | 0.04 | 0.18 |
| tau == FBgn0051057           | INC137E11 | 0.04 | 0.33 |
| CG1379 == FBgn0031124        | INC034B06 | 0.04 | 0.53 |
| CG12140 == FBgn0033465       | INC049H04 | 0.04 | 0.16 |
| CG7809 == FBgn0036919        | INC128B09 | 0.04 | 0.14 |
| CG10153 == FBgn0033962       | INC147F08 | 0.04 | 0.11 |
| Trap170 == FBgn0035145       | INC098E03 | 0.04 | 0.17 |
| CG12997 == FBgn0030831       | INC025G01 | 0.04 | 0.14 |
| CG5535 == FBgn0036764        | INC151D09 | 0.04 | 0.39 |
| Df31 == FBgn0022893          | INC082A02 | 0.04 | 0.22 |
| CG10343 == FBgn0032703       | INC014C02 | 0.04 | 0.08 |
| Rab-RP1 == FBgn0015788       | INC009E06 | 0.04 | 0.39 |
| CG15322 == FBgn0031088       | INC013H02 | 0.04 | 0.25 |
| CG7989 == FBgn0034119        | INC068F04 | 0.04 | 0.12 |
| Tbp-1 == FBgn0028684         | INC071C12 | 0.04 | 0.18 |
| CG31534 == FBgn0051534       | INC076E07 | 0.04 | 0.12 |
| beat-Ilb == FBgn0038494      | INC111A03 | 0.04 | 0.18 |
| GluClalpha == FBgn0024963    | INC055D07 | 0.04 | 0.27 |
| CG1900 == FBgn0030391        | INC151H03 | 0.04 | 0.14 |
| asf1 == FBgn0029094          | INC053E08 | 0.04 | 0.13 |
| spn-E == FBgn0003483         | INC023A08 | 0.04 | 0.22 |
| CG11980 == FBgn0037652       | INC073F03 | 0.04 | 0.22 |
| CG11098 == FBgn0031842       | INC084F01 | 0.04 | 0.15 |
| CG3641 == FBgn0038270        | INC093B04 | 0.04 | 0.23 |
| CG10306 == FBgn0034654       | INC077E10 | 0.04 | 0.16 |
| CG31348 == FBgn0051348       | INC037E08 | 0.04 | 0.17 |
| CG11665 == FBgn0033028       | INC054C08 | 0.04 | 0.19 |
| CG11799 == FBgn0036134       | INC059B04 | 0.04 | 0.37 |
| CG7998 == FBgn0038587        | INC015E10 | 0.04 | 0.20 |
| Argk == FBgn0000116          | INC039G01 | 0.04 | 0.13 |
| CG13894 == FBgn0035157       | INC099F03 | 0.04 | 0.13 |
| CypI == FBgn0035141          | INC036E09 | 0.04 | 0.32 |
| nop5 == FBgn0026196          | INC029B10 | 0.04 | 0.30 |
| CG3891 == FBgn0035993        | INC056H09 | 0.04 | 0.14 |
| CG6197 == FBgn0033859        | INC034D05 | 0.04 | 0.14 |
| CG4764 == FBgn0031310        | INC021G10 | 0.05 | 0.08 |

## Table2S\_Sun\_Cline

|                             |           |      |      |
|-----------------------------|-----------|------|------|
| Aef1 == FBgn0005694         | INC045F08 | 0.05 | 0.10 |
| CG5971 == FBgn0035918       | INC017G01 | 0.05 | 0.28 |
| elav == FBgn0000570         | INC070F04 | 0.05 | 0.18 |
| CG8831 == FBgn0033737       | INC054F09 | 0.05 | 0.34 |
| Nop60B == FBgn0023184       | INC113A07 | 0.05 | 0.15 |
| CG14395 == FBgn0038073      | INC078H08 | 0.05 | 0.19 |
| upl == FBgn0004169          | INC107A06 | 0.05 | 0.07 |
| CG9919 == FBgn0030742       | INC113G11 | 0.05 | 0.66 |
| M(2)21AB == FBgn0005278     | INC081B02 | 0.05 | 0.18 |
| CG15046 == FBgn0030927      | INC082C05 | 0.05 | 0.35 |
| E2f == FBgn0011766          | INC077F03 | 0.05 | 0.14 |
| bab1 == FBgn0004870         | INC154E01 | 0.05 | 0.09 |
| CG6746 == FBgn0032394       | INC056D09 | 0.05 | 0.18 |
| CG11265 == FBgn0030049      | INC061C09 | 0.05 | 0.30 |
| CG12384 == FBgn0033624      | INC109D12 | 0.05 | 0.22 |
| CG4250 == FBgn0034761       | INC112A04 | 0.05 | 0.12 |
| Ssb-c31a == FBgn0015299     | INC120B09 | 0.05 | 0.11 |
| ldh == FBgn0001248          | INC045H01 | 0.05 | 0.10 |
| CG12519 == FBgn0036872      | INC106D08 | 0.05 | 0.10 |
| CG30263 == FBgn0050263      | INC048F10 | 0.05 | 0.24 |
| bonsai == FBgn0026261       | INC013G07 | 0.05 | 0.18 |
| CG33113 == FBgn0053113      | INC115A01 | 0.05 | 0.05 |
| CG17264 == FBgn0031490      | INC058B03 | 0.05 | 0.25 |
| BEST:LD13441 == FBgn0028953 | INC100B01 | 0.05 | 0.13 |
| btz == FBgn0045862          | INC021E09 | 0.05 | 0.61 |
| CG14550 == FBgn0039405      | INC129E10 | 0.05 | 0.13 |
| CG3967 == FBgn0035989       | INC051G02 | 0.05 | 0.13 |
| CG15877 == FBgn0035337      | INC073B05 | 0.05 | 0.12 |
| l(1)10Bb == FBgn0001491     | INC061C02 | 0.05 | 0.22 |
| Elongin-B == FBgn0023212    | INC121G11 | 0.05 | 0.36 |
| vri == FBgn0016076          | INC103H10 | 0.05 | 0.11 |
| Ccp84Ab == FBgn0004782      | INC102E03 | 0.05 | 0.23 |
| CG12744 == FBgn0033459      | INC049F04 | 0.05 | 0.20 |
| Cp1 == FBgn0013770          | INC029C10 | 0.05 | 0.31 |
| ApepP == FBgn0026150        | INC068A07 | 0.05 | 0.14 |
| CG13349 == FBgn0033886      | INC046H03 | 0.05 | 0.22 |
| Cyp1 == FBgn0004432         | INC054A11 | 0.05 | 0.23 |
| Pros25 == FBgn0010405       | INC144B02 | 0.05 | 0.12 |
| CG17331 == FBgn0032596      | INC126H10 | 0.05 | 0.13 |
| CG16937 == FBgn0032991      | INC116H04 | 0.05 | 0.21 |
| CG13049 == FBgn0036592      | INC017H08 | 0.05 | 0.33 |
| EG:22E5.8 == FBgn0025625    | INC006F11 | 0.05 | 0.14 |
| wibg == FBgn0034918         | INC018F01 | 0.05 | 0.18 |
| Cam == FBgn0000253          | INC145E04 | 0.05 | 0.25 |
| CG16840 == FBgn0032329      | INC031G07 | 0.05 | 0.05 |
| CG6766 == FBgn0032398       | INC034A04 | 0.05 | 0.10 |
| CG6359 == FBgn0038065       | INC077E01 | 0.05 | 0.29 |
| CG13066 == FBgn0040797      | INC139E01 | 0.05 | 0.23 |
| CG32560 == FBgn0052560      | INC154B05 | 0.05 | 0.17 |
| CG32628 == FBgn0052628      | INC075A09 | 0.05 | 0.25 |
| Akap200 == FBgn0027932      | INC100B08 | 0.05 | 0.08 |
| His2Av == FBgn0001197       | INC117G11 | 0.05 | 0.19 |
| pcm == FBgn0020261          | INC099E02 | 0.05 | 0.22 |
| CG8258 == FBgn0033342       | INC104E07 | 0.05 | 0.11 |
| csw == FBgn0000382          | INC089D12 | 0.05 | 0.22 |
| CG10214 == FBgn0039115      | INC064C08 | 0.05 | 0.15 |
| CG15455 == FBgn0031121      | INC112G09 | 0.05 | 0.81 |
| CG11848 == FBgn0039282      | INC082D02 | 0.05 | 0.14 |
| gt == FBgn0001150           | INC084C05 | 0.05 | 0.07 |
| CG5386 == FBgn0038945       | INC029A10 | 0.05 | 0.21 |
| 14-3-3zeta == FBgn0004907   | INC136G07 | 0.05 | 0.09 |
| Chi == FBgn0013764          | INC097H12 | 0.05 | 0.30 |
| Su(var)205 == FBgn0003607   | INC048A03 | 0.05 | 0.26 |

## Table2S\_Sun\_Cline

|                              |           |      |      |
|------------------------------|-----------|------|------|
| CG5560 == FBgn0030607        | INC065C08 | 0.05 | 0.14 |
| CG13096 == FBgn0032050       | INC082A11 | 0.05 | 0.18 |
| Hsp23 == FBgn0001224         | INC113E01 | 0.05 | 0.19 |
| CG10973 == FBgn0036306       | INC044G10 | 0.05 | 0.16 |
| hkb == FBgn0001204           | INC066E07 | 0.05 | 0.13 |
| CG7745 == FBgn0033616        | INC051C12 | 0.05 | 0.41 |
| tsr == FBgn0011726           | INC149D06 | 0.05 | 0.11 |
| BcDNA:LD08534 == FBgn0027890 | INC127F10 | 0.05 | 0.15 |
| CG31033 == FBgn0051033       | INC122A02 | 0.05 | 0.05 |
| CG15597 == FBgn0037420       | INC112B09 | 0.05 | 0.17 |
| E(bx) == FBgn0000541         | INC060G02 | 0.05 | 0.16 |
| bys == FBgn0010292           | INC046E11 | 0.05 | 0.17 |
| CG8289 == FBgn0030854        | INC090F11 | 0.05 | 0.11 |
| arr == FBgn0000119           | INC051H12 | 0.05 | 0.13 |
| CG9731 == FBgn0037640        | INC062A09 | 0.05 | 0.26 |
| CG3817 == FBgn0038275        | INC029D06 | 0.05 | 0.09 |
| Acon == FBgn0010100          | INC065H03 | 0.05 | 0.17 |
| CT38631                      | INC104H05 | 0.05 | 0.27 |
| CT35057                      | INC153H03 | 0.05 | 0.17 |
| CG11652 == FBgn0036194       | INC080E08 | 0.05 | 0.17 |
| CG12756 == FBgn0035624       | INC144C10 | 0.05 | 0.15 |
| Gbeta13F == FBgn0001105      | INC065B06 | 0.05 | 0.39 |
| vap == FBgn0003969           | INC001C04 | 0.05 | 0.23 |
| eIF-4E == FBgn0015218        | INC132H06 | 0.05 | 0.07 |
| por == FBgn0004957           | INC048G01 | 0.05 | 0.33 |
| Prat == FBgn0004901          | INC073G03 | 0.05 | 0.20 |
| CG12523 == FBgn0036102       | INC009F03 | 0.05 | 0.05 |
| CG18591 == FBgn0031962       | INC135D10 | 0.05 | 0.09 |
| CG14355 == FBgn0038208       | INC054E08 | 0.05 | 0.63 |
| CG9503 == FBgn0030598        | INC154C09 | 0.05 | 0.15 |
| CG4000 == FBgn0038820        | INC155A04 | 0.05 | 0.31 |
| CG12292 == FBgn0032451       | INC155E11 | 0.05 | 0.19 |
| NP15.6 == FBgn0027785        | INC018A01 | 0.05 | 0.17 |
| cdc2 == FBgn0004106          | INC058D08 | 0.05 | 0.18 |
| Lis1 == FBgn0015754          | INC073A04 | 0.06 | 0.17 |
| RpP2 == FBgn0002593          | INC110D12 | 0.06 | 0.29 |
| Pcl == FBgn0003044           | INC061D01 | 0.06 | 0.10 |
| smi35A == FBgn0016930        | INC075B03 | 0.06 | 0.12 |
| CT35230                      | INC133H09 | 0.06 | 0.14 |
| CG11761 == FBgn0033528       | INC126E12 | 0.06 | 0.19 |
| CG17388 == FBgn0033937       | INC117H07 | 0.06 | 0.31 |
| Pep == FBgn0004401           | INC056G01 | 0.06 | 0.20 |
| BG:DS05639.1 == FBgn0028877  | INC024A09 | 0.06 | 0.41 |
| CG8778 == FBgn0033761        | INC043H02 | 0.06 | 0.08 |
| CG11522 == FBgn0039857       | INC014E05 | 0.06 | 0.22 |
| Tsp42E == FBgn0033134        | INC158G04 | 0.06 | 0.09 |
| Ubp64E == FBgn0016756        | INC083D09 | 0.06 | 0.13 |
| CG5214 == FBgn0037891        | INC035B10 | 0.06 | 0.35 |
| CG6744 == FBgn0037901        | INC010G07 | 0.06 | 0.16 |
| Nurf-38 == FBgn0016687       | INC128D03 | 0.06 | 0.06 |
| ewg == FBgn0005427           | INC072B03 | 0.06 | 0.09 |
| CG7334 == FBgn0036191        | INC020H02 | 0.06 | 0.33 |
| CG10423 == FBgn0039300       | INC115H07 | 0.06 | 0.24 |
| Sp1 == FBgn0020378           | INC033H03 | 0.06 | 0.13 |
| HmgD == FBgn0004362          | INC018E05 | 0.06 | 0.33 |
| M(2)21AB == FBgn0005278      | INC069D09 | 0.06 | 0.10 |
| CG7203 == FBgn0031942        | INC012F04 | 0.06 | 0.88 |
| Aats-ile == FBgn0027086      | INC016A06 | 0.06 | 0.18 |
| osk == FBgn0003015           | INC012B07 | 0.06 | 0.18 |
| RpS20 == FBgn0019936         | INC150C12 | 0.06 | 0.08 |
| RpS15A == FBgn0010198        | INC018D09 | 0.06 | 0.15 |
| CG10238 == FBgn0039280       | INC117H08 | 0.06 | 0.11 |
| CG5928 == FBgn0029836        | INC120F04 | 0.06 | 0.12 |

## Table2S\_Sun\_Cline

|                             |           |      |      |
|-----------------------------|-----------|------|------|
| Ssrp == FBgn0010278         | INC024D05 | 0.06 | 0.15 |
| CG33096 == FBgn0053096      | INC151A05 | 0.06 | 0.19 |
| CG5147 == FBgn0036775       | INC035G01 | 0.06 | 0.13 |
| abd-A == FBgn0000014        | INC127C07 | 0.06 | 0.28 |
| Elf == FBgn0020443          | INC077G07 | 0.06 | 0.26 |
| TfIIIFbeta == FBgn0010421   | INC098C08 | 0.06 | 0.15 |
| CG6891 == FBgn0030955       | INC119E04 | 0.06 | 0.05 |
| eIB == FBgn0004858          | INC054A09 | 0.06 | 0.31 |
| CG32245 == FBgn0052245      | INC087E06 | 0.06 | 0.19 |
| CG1135 == FBgn0035489       | INC005A01 | 0.06 | 0.08 |
| nej == FBgn0015624          | INC051H01 | 0.06 | 0.05 |
| CG3751 == FBgn0034751       | INC025H12 | 0.06 | 0.21 |
| CG12391 == FBgn0033581      | INC095D11 | 0.06 | 0.18 |
| CG9246 == FBgn0032925       | INC065H02 | 0.06 | 0.14 |
| Mo25 == FBgn0017572         | INC050F03 | 0.06 | 0.09 |
| PyK == FBgn0003178          | INC018C08 | 0.06 | 0.12 |
| CG11051 == FBgn0040813      | INC153G05 | 0.06 | 0.34 |
| CG30410 == FBgn0050410      | INC077B01 | 0.06 | 0.10 |
| mRpL33 == FBgn0040907       | INC147B03 | 0.06 | 0.09 |
| Acp1 == FBgn0014454         | INC009B06 | 0.06 | 0.46 |
| CG9286 == FBgn0038183       | INC028A03 | 0.06 | 0.06 |
| CG14200 == FBgn0031023      | INC009G03 | 0.06 | 0.35 |
| tra == FBgn0003741          | INC115F11 | 0.06 | 0.16 |
| CG31645 == FBgn0051645      | INC121H07 | 0.06 | 0.08 |
| ana == FBgn0011746          | INC039E03 | 0.06 | 0.24 |
| Hph == FBgn0037308          | INC006H02 | 0.06 | 0.29 |
| ATPsyn-gamma == FBgn0020235 | INC006B04 | 0.06 | 0.12 |
| Ntf-2 == FBgn0031145        | INC137F05 | 0.06 | 0.17 |
| CG8121 == FBgn0037680       | INC018B03 | 0.06 | 0.13 |
| CG9235 == FBgn0034560       | INC041B10 | 0.06 | 0.27 |
| tou == FBgn0033636          | INC037A01 | 0.06 | 0.23 |
| CG6854 == FBgn0036478       | INC105C07 | 0.06 | 0.16 |
| klu == FBgn0013469          | INC077A07 | 0.06 | 0.24 |
| CG2099 == FBgn0037328       | INC119A01 | 0.06 | 0.09 |
| CG15690 == FBgn0038825      | INC113B05 | 0.06 | 0.19 |
| dI == FBgn0000462           | INC006E08 | 0.06 | 0.31 |
| CG11590 == FBgn0030545      | INC076C04 | 0.06 | 0.16 |
| Sdic == FBgn0025801         | INC064H11 | 0.06 | 0.15 |
| rab3-GEF == FBgn0030613     | INC007B09 | 0.06 | 0.27 |
| CG14419 == FBgn0029639      | INC155H10 | 0.06 | 0.25 |
| CG12534 == FBgn0031068      | INC120B05 | 0.06 | 0.13 |
| CG9248 == FBgn0032923       | INC065G04 | 0.06 | 0.13 |
| SmB == FBgn0010083          | INC056F12 | 0.06 | 0.09 |
| zfh1 == FBgn0004606         | INC007H09 | 0.06 | 0.12 |
| ATPCL == FBgn0020236        | INC063A08 | 0.06 | 0.21 |
| Nmt == FBgn0020392          | INC078F11 | 0.06 | 0.13 |
| Tehao == FBgn0026760        | INC041G09 | 0.06 | 0.12 |
| Cdc42 == FBgn0010341        | INC011G10 | 0.06 | 0.39 |
| InR == FBgn0013984          | INC081E11 | 0.07 | 0.42 |
| mRpS34 == FBgn0036613       | INC049G11 | 0.07 | 0.22 |
| CG13746 == FBgn0033341      | INC115F04 | 0.07 | 0.04 |
| CG9000 == FBgn0034176       | INC048H10 | 0.07 | 0.12 |
| CG9588 == FBgn0038166       | INC005D01 | 0.07 | 0.20 |
| 128up == FBgn0010339        | INC075A06 | 0.07 | 0.24 |
| CG14419 == FBgn0029639      | INC080B11 | 0.07 | 0.06 |
| CR12628 == FBgn0032985      | INC133C02 | 0.07 | 0.10 |
| CG11700 == FBgn0029856      | INC155H12 | 0.07 | 0.13 |
| CG11752 == FBgn0030292      | INC078B11 | 0.07 | 0.12 |
| CG6756 == FBgn0032397       | INC154H03 | 0.07 | 0.20 |
| dlg1 == FBgn0001624         | INC084H04 | 0.07 | 0.26 |
| Act5c == FBgn0000042        | CONv04D24 | 0.07 | 0.36 |
| CG11207 == FBgn0030241      | INC068G01 | 0.07 | 0.16 |
| CG6937 == FBgn0038989       | INC046F03 | 0.07 | 0.29 |

## Table2S\_Sun\_Cline

|                              |           |      |      |
|------------------------------|-----------|------|------|
| CG17292 == FBgn0032029       | INC128G08 | 0.07 | 0.07 |
| CG8086 == FBgn0032010        | INC031G10 | 0.07 | 0.14 |
| mRpS9 == FBgn0037529         | INC121A10 | 0.07 | 0.16 |
| CG32705 == FBgn0052705       | INC136A09 | 0.07 | 0.10 |
| e(r) == FBgn0011586          | INC031A09 | 0.07 | 0.20 |
| mtSSB == FBgn0010438         | INC109C11 | 0.07 | 0.55 |
| Uba1 == FBgn0023143          | INC070F02 | 0.07 | 0.23 |
| CG9247 == FBgn0032924        | INC057A07 | 0.07 | 0.05 |
| CG9994 == FBgn0032782        | INC153F04 | 0.07 | 0.09 |
| CG30431 == FBgn0050431       | INC062D06 | 0.07 | 0.21 |
| BcDNA:GH07921 == FBgn0027567 | INC078B02 | 0.07 | 0.19 |
| mRpL3 == FBgn0030686         | INC157E09 | 0.07 | 0.06 |
| CSN7b == FBgn0033291         | INC150A02 | 0.07 | 0.08 |
| Jheh2 == FBgn0034405         | INC020E03 | 0.07 | 0.17 |
| CG5728 == FBgn0039182        | INC094F08 | 0.07 | 0.11 |
| FK506-bp2 == FBgn0013954     | INC017G12 | 0.07 | 0.23 |
| Eip75B == FBgn0000568        | INC078G08 | 0.07 | 0.44 |
| wupA == FBgn0004028          | INC153B05 | 0.07 | 0.10 |
| Zn72D == FBgn0017453         | INC084C06 | 0.07 | 0.14 |
| dmrt99B == FBgn0039683       | INC066D09 | 0.07 | 0.19 |
| CG8415 == FBgn0033912        | INC117F11 | 0.07 | 0.07 |
| CG7220 == FBgn0033544        | INC109C01 | 0.07 | 0.07 |
| CG30165 == FBgn0050165       | INC011H02 | 0.07 | 0.25 |
| CG8630 == FBgn0038130        | INC124G10 | 0.07 | 0.16 |
| dpa == FBgn0015929           | INC009D04 | 0.07 | 0.19 |
| L == FBgn0001332             | INC072D09 | 0.07 | 0.18 |
| CG32744 == FBgn0052744       | INC128G07 | 0.07 | 0.10 |
| Pal == FBgn0020623           | INC155F06 | 0.07 | 0.13 |
| CG17836 == FBgn0038661       | INC050B04 | 0.07 | 0.44 |
| CG12006 == FBgn0035464       | INC086F10 | 0.07 | 0.19 |
| oho23B == FBgn0015521        | INC136F05 | 0.07 | 0.10 |
| Rpl118 == FBgn0003275        | INC117G12 | 0.07 | 0.19 |
| CG18067 == FBgn0034512       | INC068C04 | 0.07 | 0.14 |
| RpL8 == FBgn0024939          | INC077E09 | 0.07 | 0.23 |
| CG10602 == FBgn0032721       | INC085F03 | 0.07 | 0.18 |
| CG8326 == FBgn0030851        | INC074F10 | 0.07 | 0.08 |
| CG13217 == FBgn0033590       | INC115B02 | 0.07 | 0.14 |
| CG6199 == FBgn0036147        | INC011C06 | 0.07 | 0.22 |
| CG4695 == FBgn0037859        | INC035D09 | 0.07 | 0.39 |
| CG6094 == FBgn0032261        | INC020A03 | 0.07 | 0.14 |
| CG5482 == FBgn0034368        | INC096G02 | 0.07 | 0.12 |
| cyc == FBgn0023094           | INC087H10 | 0.07 | 0.07 |
| CG10903 == FBgn0037543       | INC087G07 | 0.07 | 0.13 |
| Sps2 == FBgn0032224          | INC073F12 | 0.07 | 0.12 |
| ena == FBgn0000578           | INC154A04 | 0.07 | 0.16 |
| CG13678 == FBgn0035859       | INC118A04 | 0.07 | 0.22 |
| CG11984 == FBgn0037655       | INC073D03 | 0.07 | 0.09 |
| CG4022 == FBgn0035986        | INC097F05 | 0.07 | 0.09 |
| chic == FBgn0000308          | INC141A07 | 0.07 | 0.23 |
| CG32954 == FBgn0052954       | INC118C05 | 0.07 | 0.19 |
| H == FBgn0001169             | INC140B04 | 0.07 | 0.24 |
| CG12811 == FBgn0037779       | INC121H03 | 0.07 | 0.10 |
| CG3499 == FBgn0034792        | INC093E10 | 0.07 | 0.09 |
| lolal == FBgn0022238         | INC129F08 | 0.07 | 0.31 |
| Sgs3 == FBgn0003373          | INC030B01 | 0.07 | 0.54 |
| gig == FBgn0005198           | INC051C04 | 0.07 | 0.10 |
| CG15741 == FBgn0030338       | INC127H08 | 0.07 | 0.21 |
| ced-6 == FBgn0029092         | INC025B09 | 0.07 | 0.17 |
| CG1883 == FBgn0039757        | INC120F01 | 0.07 | 0.17 |
| CG15544 == FBgn0039804       | INC067C02 | 0.07 | 0.36 |
| CG5919 == FBgn0038876        | INC030D11 | 0.07 | 0.09 |
| mus209 == FBgn0005655        | INC103B12 | 0.07 | 0.11 |
| TfIIA-S == FBgn0013347       | INC021H07 | 0.08 | 0.23 |

## Table2S\_Sun\_Cline

|                               |           |      |      |
|-------------------------------|-----------|------|------|
| Rpn1 == FBgn0028695           | INC117G01 | 0.08 | 0.12 |
| CG10737 == FBgn0034420        | INC130B07 | 0.08 | 0.38 |
| CG11808 == FBgn0034000        | INC073F11 | 0.08 | 0.13 |
| nes == FBgn0026630            | INC049A04 | 0.08 | 0.34 |
| CG17272 == FBgn0038830        | INC124E07 | 0.08 | 0.07 |
| TfIIIS == FBgn0010422         | INC101H06 | 0.08 | 0.16 |
| Scr == FBgn0003339            | INC073B01 | 0.08 | 0.28 |
| NetA == FBgn0015773           | INC154A02 | 0.08 | 0.13 |
| CG10881 == FBgn0038796        | INC087C01 | 0.08 | 0.07 |
| Cdc37 == FBgn0011573          | INC093C01 | 0.08 | 0.11 |
| CG4627 == FBgn0033808         | INC084F07 | 0.08 | 0.16 |
| Hsf == FBgn0001222            | INC081F11 | 0.08 | 0.08 |
| sty == FBgn0014388            | INC097G10 | 0.08 | 0.13 |
| flw == FBgn0000711            | INC091A02 | 0.08 | 0.10 |
| RpS13 == FBgn0010265          | INC117G07 | 0.08 | 0.25 |
| smt3 == FBgn0026170           | INC021H02 | 0.08 | 0.25 |
| Ccp84Ac == FBgn0004781        | INC016G10 | 0.08 | 1.13 |
| EG:BACR42117.6 == FBgn0040360 | INC154G09 | 0.08 | 0.13 |
| Pp1-87B == FBgn0004103        | INC109A04 | 0.08 | 0.24 |
| Mlc2 == FBgn0002773           | INC035D05 | 0.08 | 0.20 |
| shot == FBgn0013733           | INC048F05 | 0.08 | 0.28 |
| Taf12 == FBgn0011290          | INC152F02 | 0.08 | 0.05 |
| RpL7 == FBgn0005593           | INC020G08 | 0.08 | 0.11 |
| CG13953 == FBgn0033416        | INC102E12 | 0.08 | 0.52 |
| BcDNA:GH11973 == FBgn0027542  | INC078D12 | 0.08 | 0.18 |
| CG6846 == FBgn0036825         | INC066B03 | 0.08 | 0.10 |
| fbp == FBgn0032820            | INC051C08 | 0.08 | 0.09 |
| Hnf4 == FBgn0004914           | INC001E05 | 0.08 | 0.19 |
| CG11294 == FBgn0030058        | INC116B07 | 0.08 | 0.50 |
| CG10326 == FBgn0038453        | INC094D09 | 0.08 | 0.10 |
| Tfb1 == FBgn0033929           | INC049G10 | 0.08 | 0.17 |
| CG14755 == FBgn0033282        | INC154F08 | 0.08 | 0.12 |
| CG8231 == FBgn0030681         | INC067F03 | 0.08 | 0.05 |
| mask == FBgn0043884           | INC063G07 | 0.08 | 0.12 |
| IM1 == FBgn0034329            | INC145D02 | 0.08 | 0.09 |
| CG10664 == FBgn0032833        | INC124F06 | 0.08 | 0.05 |
| CG30389 == FBgn0050389        | INC155G12 | 0.08 | 0.25 |
| CG6015 == FBgn0038927         | INC064A08 | 0.08 | 0.22 |
| cpo == FBgn0000363            | INC012H07 | 0.08 | 0.41 |
| br == FBgn0000210             | INC154A03 | 0.08 | 0.07 |
| CG11887 == FBgn0033540        | INC008H08 | 0.08 | 0.18 |
| CG13393 == FBgn0032035        | INC130D11 | 0.08 | 0.03 |
| CG11897 == FBgn0039644        | INC018G09 | 0.08 | 0.26 |
| CG10095 == FBgn0037993        | INC022G08 | 0.08 | 0.26 |
| CG12082 == FBgn0035402        | INC025H02 | 0.08 | 0.16 |
| Cnx99A == FBgn0015622         | INC006G06 | 0.08 | 0.36 |
| mRpS16 == FBgn0033907         | INC158E07 | 0.08 | 0.16 |
| CG7177 == FBgn0037098         | INC045H08 | 0.08 | 0.24 |
| BcDNA:GH02431 == FBgn0027610  | INC029G06 | 0.08 | 0.24 |
| bor == FBgn0040237            | INC077A09 | 0.08 | 0.19 |
| CG11337 == FBgn0039846        | INC071C02 | 0.08 | 0.26 |
| ATPsyn-d == FBgn0016120       | INC016G07 | 0.08 | 0.15 |
| alien == FBgn0013746          | INC001B05 | 0.08 | 0.10 |
| CG11266 == FBgn0031883        | INC073E04 | 0.08 | 0.16 |
| CG6568 == FBgn0034210         | INC060D07 | 0.08 | 0.32 |
| Lam == FBgn0002525            | INC050B05 | 0.08 | 0.10 |
| ND23 == FBgn0017567           | INC036D08 | 0.08 | 0.19 |
| Caf1-180 == FBgn0030054       | INC088H03 | 0.08 | 0.03 |
| Rtc1 == FBgn0020909           | INC059E10 | 0.08 | 0.04 |
| sns == FBgn0024189            | INC021D07 | 0.08 | 0.28 |
| CG1137 == FBgn0037454         | INC042H11 | 0.08 | 0.23 |
| EG:100G7.6 == FBgn0025643     | INC004E08 | 0.08 | 0.62 |
| CG11071 == FBgn0030532        | INC019H02 | 0.08 | 0.30 |



## Table2S\_Sun\_Cline

|                              |           |      |      |
|------------------------------|-----------|------|------|
| CG6084 == FBgn0036182        | INC006H03 | 0.08 | 0.18 |
| geminin == FBgn0033081       | INC086F05 | 0.08 | 0.12 |
| bl == FBgn0015907            | INC088D09 | 0.08 | 0.17 |
| CG31632 == FBgn0051632       | INC031H08 | 0.08 | 0.50 |
| Fur1 == FBgn0004509          | INC049G05 | 0.08 | 0.56 |
| CG15361 == FBgn0040717       | INC153F01 | 0.08 | 0.10 |
| skf == FBgn0050021           | INC030F12 | 0.09 | 0.12 |
| CG4447 == FBgn0035980        | INC035G04 | 0.09 | 0.24 |
| B52 == FBgn0004587           | INC054C04 | 0.09 | 0.41 |
| Bx == FBgn0000242            | INC155A06 | 0.09 | 0.46 |
| CG14755 == FBgn0033282       | INC010A04 | 0.09 | 0.21 |
| Mcr == FBgn0020240           | INC060C05 | 0.09 | 0.16 |
| CG33147 == FBgn0053147       | INC111E04 | 0.09 | 0.30 |
| bab1 == FBgn0004870          | INC088H06 | 0.09 | 0.14 |
| Cyp6a2 == FBgn0000473        | INC033F08 | 0.09 | 0.13 |
| rok == FBgn0026181           | INC014D04 | 0.09 | 0.17 |
| ytr == FBgn0021895           | INC014D12 | 0.09 | 0.17 |
| CG11180 == FBgn0034528       | INC064B08 | 0.09 | 0.33 |
| Cat == FBgn0000261           | INC039E12 | 0.09 | 0.21 |
| CG1304 == FBgn0031141        | INC154C03 | 0.09 | 0.09 |
| CG5384 == FBgn0032216        | INC031E05 | 0.09 | 0.16 |
| CG9699 == FBgn0030772        | INC057F01 | 0.09 | 0.20 |
| CG5466 == FBgn0038815        | INC084A04 | 0.09 | 0.26 |
| CG14454 == FBgn0037177       | INC122F01 | 0.09 | 0.14 |
| CG8974 == FBgn0030693        | INC119G11 | 0.09 | 0.21 |
| CG7323 == FBgn0036943        | INC125H06 | 0.09 | 0.12 |
| scrib == FBgn0026178         | INC081A12 | 0.09 | 0.21 |
| CG14434 == FBgn0029915       | INC034D07 | 0.09 | 0.14 |
| spir == FBgn0003475          | INC111G08 | 0.09 | 0.08 |
| RpL40 == FBgn0003941         | INC137H01 | 0.09 | 0.13 |
| CG8430 == FBgn0034079        | INC038E05 | 0.09 | 0.20 |
| CG11458 == FBgn0040637       | INC015H07 | 0.09 | 0.26 |
| CG7698 == FBgn0038636        | INC065E08 | 0.09 | 0.19 |
| Act5c == FBgn0000042         | CONv04A22 | 0.09 | 0.28 |
| SdhB == FBgn0014028          | INC138B01 | 0.09 | 0.17 |
| Cka == FBgn0044323           | INC025D01 | 0.09 | 0.23 |
| CG12141 == FBgn0030143       | INC120G09 | 0.09 | 0.09 |
| CG5642 == FBgn0036258        | INC049C01 | 0.09 | 0.06 |
| OstStt3 == FBgn0011336       | INC074C02 | 0.09 | 0.09 |
| M(2)21AB == FBgn0005278      | INC095C05 | 0.09 | 0.18 |
| snRNP70K == FBgn0016978      | INC154E02 | 0.09 | 0.14 |
| CG3434 == FBgn0036000        | INC094A07 | 0.09 | 0.11 |
| Adf1 == FBgn0000054          | INC098D01 | 0.09 | 0.20 |
| CG32365 == FBgn0052365       | INC142E04 | 0.09 | 0.23 |
| CG15220 == FBgn0030322       | INC145F03 | 0.09 | 0.08 |
| BEAF-32 == FBgn0015602       | INC076H10 | 0.09 | 0.11 |
| Prx5037 == FBgn0038519       | INC039A08 | 0.09 | 0.11 |
| CG10217 == FBgn0039113       | INC033D05 | 0.09 | 0.13 |
| regucalcin == FBgn0030362    | INC074H09 | 0.09 | 0.12 |
| LamC == FBgn0010397          | INC023C10 | 0.09 | 0.06 |
| CG7888 == FBgn0036116        | INC151G10 | 0.09 | 0.28 |
| lin19 == FBgn0015509         | INC088F06 | 0.09 | 0.07 |
| Gapdh1 == FBgn0001091        | INC147E12 | 0.09 | 0.19 |
| Mlc-c == FBgn0004687         | INC070G03 | 0.09 | 0.13 |
| eIF-2beta == FBgn0004926     | INC014A12 | 0.09 | 0.10 |
| CG11500 == FBgn0040623       | INC111C11 | 0.09 | 0.08 |
| Act5c == FBgn0000042         | CONv04D23 | 0.09 | 0.79 |
| CG4798 == FBgn0034213        | INC156C09 | 0.09 | 0.12 |
| Act5c == FBgn0000042         | CONv04A24 | 0.09 | 0.26 |
| Rlb1 == FBgn0014022          | INC083C06 | 0.09 | 0.12 |
| BcDNA:LD29892 == FBgn0027495 | INC096F10 | 0.09 | 0.19 |
| CG4390 == FBgn0038771        | INC013D12 | 0.09 | 0.04 |
| CG3792 == FBgn0031662        | INC004B03 | 0.09 | 0.20 |

## Table2S\_Sun\_Cline

|                              |           |      |      |
|------------------------------|-----------|------|------|
| CG12522 == FBgn0036131       | INC133F03 | 0.09 | 0.22 |
| Vha55 == FBgn0005671         | INC119C04 | 0.09 | 0.10 |
| CG4554 == FBgn0034734        | INC025A11 | 0.09 | 0.17 |
| CG10336 == FBgn0032698       | INC037G02 | 0.09 | 0.09 |
| Rpl115 == FBgn0004855        | INC071F09 | 0.09 | 0.16 |
| alpha-Adaptin == FBgn0015567 | INC022F09 | 0.09 | 0.35 |
| Cam == FBgn0000253           | INC147C02 | 0.09 | 0.09 |
| CG33138 == FBgn0053138       | INC003H08 | 0.09 | 0.11 |
| Arf79F == FBgn0010348        | INC068H09 | 0.10 | 0.06 |
| CG6910 == FBgn0036262        | INC045D11 | 0.10 | 0.17 |
| Act5c == FBgn0000042         | CONv04C19 | 0.10 | 0.25 |
| CG8029 == FBgn0033393        | INC065G02 | 0.10 | 0.09 |
| eIF-3p40 == FBgn0022023      | INC036G03 | 0.10 | 0.24 |
| BG:DS09218.3 == FBgn0028506  | INC061D04 | 0.10 | 0.19 |
| Cg25C == FBgn0000299         | INC030H10 | 0.10 | 0.22 |
| cpo == FBgn0000363           | INC123H12 | 0.10 | 0.18 |
| CG31075 == FBgn0051075       | INC072H03 | 0.10 | 0.15 |
| CG6637 == FBgn0038908        | INC042D03 | 0.10 | 0.03 |
| CG15166 == FBgn0032708       | INC106C05 | 0.10 | 0.08 |
| CG14177 == FBgn0036013       | INC107D09 | 0.10 | 0.29 |
| mRpL2a == FBgn0037833        | INC118B02 | 0.10 | 0.09 |
| CG12641 == FBgn0030193       | INC153H09 | 0.10 | 0.27 |
| Vha26 == FBgn0015324         | INC093H07 | 0.10 | 0.11 |
| SelD == FBgn0020615          | INC002H07 | 0.10 | 0.17 |
| CG12543 == FBgn0029872       | INC143E09 | 0.10 | 0.08 |
| Eip63E == FBgn0005640        | INC099F04 | 0.10 | 0.27 |
| CG11779 == FBgn0038683       | INC071B04 | 0.10 | 0.16 |
| CG7794 == FBgn0038565        | INC084D07 | 0.10 | 0.21 |
| Rack1 == FBgn0020618         | INC039H02 | 0.10 | 0.08 |
| Rpn7 == FBgn0028688          | INC083E09 | 0.10 | 0.10 |
| CG14235 == FBgn0031066       | INC134C11 | 0.10 | 0.32 |
| Fmr1 == FBgn0028734          | INC028B03 | 0.10 | 0.19 |
| CG15023 == FBgn0035548       | INC125F02 | 0.10 | 0.12 |
| ND75 == FBgn0017566          | INC106C07 | 0.10 | 0.06 |
| fl(2)d == FBgn0000662        | INC073A10 | 0.10 | 0.12 |
| Mcm6 == FBgn0025815          | INC045F04 | 0.10 | 0.10 |
| Act5c == FBgn0000042         | CONv04A23 | 0.10 | 0.30 |
| CG12715 == FBgn0030443       | INC054A12 | 0.10 | 0.09 |
| Mov34 == FBgn0002787         | INC076E05 | 0.10 | 0.35 |
| Nlp == FBgn0016685           | INC047A11 | 0.10 | 0.23 |
| CG14956 == FBgn0035403       | INC012D06 | 0.10 | 0.33 |
| CG9757 == FBgn0003060        | INC063D01 | 0.10 | 0.22 |
| Or1a == FBgn0029521          | INC154H09 | 0.10 | 0.23 |
| Chrac-16 == FBgn0043001      | INC029F11 | 0.10 | 0.14 |
| RpL22 == FBgn0015288         | INC018D05 | 0.10 | 0.15 |
| CG6615 == FBgn0036694        | INC122C03 | 0.10 | 0.26 |
| os == FBgn0004956            | INC059E11 | 0.10 | 0.29 |
| GstD8 == FBgn0010044         | INC071A03 | 0.10 | 0.22 |
| CG14421 == FBgn0029644       | INC119F10 | 0.10 | 0.17 |
| CG11971 == FBgn0022347       | INC073D04 | 0.10 | 0.13 |
| CG3861 == FBgn0029869        | INC108G04 | 0.10 | 0.26 |
| EG:22E5.4 == FBgn0025629     | INC108A01 | 0.10 | 0.08 |
| ed == FBgn0000547            | INC010D08 | 0.10 | 0.20 |
| Samuel == FBgn0032330        | INC135G05 | 0.10 | 0.11 |
| Chc == FBgn0000319           | INC123H02 | 0.10 | 0.14 |
| Ef1gamma == FBgn0029176      | INC056A03 | 0.10 | 0.11 |
| Grx-1 == FBgn0034658         | INC015C03 | 0.10 | 0.81 |
| ran == FBgn0020255           | INC098B01 | 0.10 | 0.12 |
| Mipp1 == FBgn0026061         | INC057A05 | 0.10 | 0.19 |
| CG13594 == FBgn0035041       | INC026H05 | 0.10 | 0.35 |
| CG4621 == FBgn0032321        | INC060H12 | 0.10 | 0.14 |
| CG5625 == FBgn0034708        | INC071F10 | 0.11 | 0.13 |
| CG14821 == FBgn0035719       | INC109A01 | 0.11 | 0.29 |

## Table2S\_Sun\_Cline

|                                |           |      |      |
|--------------------------------|-----------|------|------|
| orb == FBgn0004882             | INC059G08 | 0.11 | 0.28 |
| Smox == FBgn0025800            | INC104C06 | 0.11 | 0.20 |
| CG15663 == FBgn0034609         | INC115H11 | 0.11 | 0.09 |
| CG31176 == FBgn0051176         | INC111C04 | 0.11 | 0.11 |
| CG15225 == FBgn0034551         | INC004F01 | 0.11 | 0.08 |
| CG1746 == FBgn0039830          | INC056G08 | 0.11 | 0.17 |
| CG17665 == FBgn0039997         | INC051F05 | 0.11 | 0.07 |
| Jafrac1 == FBgn0040309         | INC012A05 | 0.11 | 0.19 |
| CG9967 == FBgn0031413          | INC109G07 | 0.11 | 0.18 |
| CG4685 == FBgn0039349          | INC013G10 | 0.11 | 0.17 |
| Peritrophin-15b == FBgn0040958 | INC128H07 | 0.11 | 0.31 |
| CG12909 == FBgn0033507         | INC021B04 | 0.11 | 0.21 |
| Rga == FBgn0017550             | INC028F06 | 0.11 | 0.29 |
| CG10795 == FBgn0034626         | INC009B01 | 0.11 | 0.12 |
| e(r) == FBgn0011586            | INC037F12 | 0.11 | 0.11 |
| CG13176 == FBgn0033692         | INC066E02 | 0.11 | 0.09 |
| mand == FBgn0002778            | INC094C02 | 0.11 | 0.16 |
| CG7015 == FBgn0035895          | INC060D05 | 0.11 | 0.08 |
| CaMKI == FBgn0016126           | INC138E08 | 0.11 | 0.19 |
| CG9471 == FBgn0037749          | INC113A01 | 0.11 | 0.15 |
| CG32071 == FBgn0052071         | INC019B05 | 0.11 | 0.44 |
| CG5946 == FBgn0036211          | INC054E09 | 0.11 | 0.14 |
| CG5767 == FBgn0034292          | INC130D04 | 0.11 | 0.23 |
| eIF5 == FBgn0030719            | INC044F09 | 0.11 | 0.15 |
| CG4841 == FBgn0032622          | INC051C10 | 0.11 | 0.21 |
| csul == FBgn0015925            | INC036B07 | 0.11 | 0.18 |
| CG13128 == FBgn0032183         | INC114B12 | 0.11 | 0.14 |
| Rpt3 == FBgn0028686            | INC006F09 | 0.11 | 0.20 |
| Rpn9 == FBgn0028691            | INC065A01 | 0.11 | 0.12 |
| Tm2 == FBgn0004117             | INC025E10 | 0.11 | 0.33 |
| rasp == FBgn0024194            | INC087F09 | 0.11 | 0.30 |
| CG32432 == FBgn0052432         | INC143E04 | 0.11 | 0.27 |
| CG7363 == FBgn0032269          | INC070E01 | 0.11 | 0.14 |
| CG7728 == FBgn0036686          | INC078B03 | 0.11 | 0.08 |
| CG2839 == FBgn0031273          | INC068F07 | 0.11 | 0.73 |
| Hop == FBgn0024352             | INC010E04 | 0.11 | 0.29 |
| CG6322 == FBgn0036733          | INC073C05 | 0.11 | 0.37 |
| eIF-1A == FBgn0026250          | INC074D04 | 0.11 | 0.24 |
| CG8857 == FBgn0033699          | INC123B12 | 0.11 | 0.13 |
| blw == FBgn0011211             | INC064E01 | 0.11 | 0.22 |
| CG9609 == FBgn0030787          | INC008B02 | 0.11 | 0.15 |
| CG15021 == FBgn0035544         | INC019G03 | 0.11 | 0.47 |
| CG3358 == FBgn0033117          | INC029E07 | 0.11 | 0.17 |
| CG10014 == FBgn0038000         | INC036B03 | 0.11 | 0.24 |
| NHP2 == FBgn0029148            | INC118A11 | 0.11 | 0.22 |
| polo == FBgn0003124            | INC105A12 | 0.11 | 0.19 |
| rexin == FBgn0033504           | INC048H02 | 0.11 | 0.42 |
| CG11799 == FBgn0036134         | INC059E05 | 0.11 | 0.37 |
| CG1994 == FBgn0030062          | INC084C12 | 0.11 | 0.17 |
| M(2)21AB == FBgn0005278        | INC080G09 | 0.11 | 0.13 |
| CG2875 == FBgn0029672          | INC077G04 | 0.12 | 0.07 |
| CG32486 == FBgn0052486         | INC112D09 | 0.12 | 0.22 |
| Rpb5 == FBgn0033571            | INC025F06 | 0.12 | 0.17 |
| CT16821                        | INC096A04 | 0.12 | 0.15 |
| eas == FBgn0000536             | INC124H04 | 0.12 | 0.13 |
| wupA == FBgn0004028            | INC153B06 | 0.12 | 0.13 |
| p47 == FBgn0033179             | INC018A09 | 0.12 | 0.15 |
| bel == FBgn0000171             | INC062F05 | 0.12 | 0.17 |
| CG7379 == FBgn0038546          | INC016A07 | 0.12 | 0.09 |
| CG8615 == FBgn0035753          | INC020G06 | 0.12 | 0.17 |
| CG7430 == FBgn0036762          | INC026E05 | 0.12 | 0.28 |
| RpS4 == FBgn0011284            | INC116A08 | 0.12 | 0.10 |
| CG2875 == FBgn0029672          | INC077G02 | 0.12 | 0.12 |

## Table2S\_Sun\_Cline

|                              |           |      |      |
|------------------------------|-----------|------|------|
| Hsc70-5 == FBgn0001220       | INC122G01 | 0.12 | 0.21 |
| Act5c == FBgn0000042         | CONv04A15 | 0.12 | 0.24 |
| Acf1 == FBgn0027620          | INC112G03 | 0.12 | 0.13 |
| CG17059 == FBgn0040754       | INC158G12 | 0.12 | 0.18 |
| CG12000 == FBgn0037314       | INC024A04 | 0.12 | 0.15 |
| CG2310 == FBgn0039665        | INC107F07 | 0.12 | 0.20 |
| CG4679 == FBgn0033816        | INC059G11 | 0.12 | 0.16 |
| Aut1 == FBgn0036813          | INC003C09 | 0.12 | 0.14 |
| BcDNA:LD23371 == FBgn0027504 | INC102G07 | 0.12 | 0.15 |
| Cas == FBgn0022213           | INC091D11 | 0.12 | 0.14 |
| Uch == FBgn0010288           | INC035H11 | 0.12 | 0.14 |
| CG33095 == FBgn0053095       | INC082B12 | 0.12 | 0.11 |
| croc == FBgn0014143          | INC078F08 | 0.12 | 0.26 |
| CG11076 == FBgn0039929       | INC013A09 | 0.12 | 0.04 |
| qkr58E-1 == FBgn0022986      | INC118E03 | 0.12 | 0.07 |
| CG7967 == FBgn0035251        | INC018B09 | 0.12 | 0.21 |
| Aly == FBgn0010774           | INC122D10 | 0.12 | 0.10 |
| CG7054 == FBgn0038972        | INC065A02 | 0.13 | 0.11 |
| Eb1 == FBgn0027066           | INC130B01 | 0.13 | 0.18 |
| skpA == FBgn0025637          | INC113D03 | 0.13 | 0.08 |
| CG13061 == FBgn0042201       | INC026C04 | 0.13 | 0.18 |
| mfas == FBgn0024211          | INC154B10 | 0.13 | 0.13 |
| CG32512 == FBgn0052512       | INC036C04 | 0.13 | 0.22 |
| Act5c == FBgn0000042         | CONv04A13 | 0.13 | 0.30 |
| CG12896 == FBgn0033521       | INC134F02 | 0.13 | 0.16 |
| CG8417 == FBgn0037744        | INC056F10 | 0.13 | 0.14 |
| sta == FBgn0003517           | INC009E08 | 0.13 | 0.14 |
| fau == FBgn0020439           | INC035G11 | 0.13 | 0.20 |
| CG9066 == FBgn0030703        | INC094E09 | 0.13 | 0.15 |
| CG17370 == FBgn0039381       | INC040G04 | 0.13 | 0.22 |
| Cbp80 == FBgn0022942         | INC121E11 | 0.13 | 0.18 |
| RhoGAP92B == FBgn0038747     | INC069B11 | 0.13 | 0.20 |
| CG32521 == FBgn0052521       | INC063C03 | 0.13 | 0.22 |
| l(2)gl == FBgn0002121        | INC002E03 | 0.13 | 0.12 |
| CG8044 == FBgn0035829        | INC024F03 | 0.13 | 0.16 |
| RpL18A == FBgn0010409        | INC076H02 | 0.13 | 0.13 |
| CG31992 == FBgn0051992       | INC077F04 | 0.13 | 0.17 |
| Aldh-III == FBgn0010548      | INC059G04 | 0.13 | 0.20 |
| sws == FBgn0003656           | INC096E02 | 0.13 | 0.06 |
| Fer2LCH == FBgn0015221       | INC033F04 | 0.13 | 0.12 |
| CG31160 == FBgn0051160       | INC080E07 | 0.13 | 0.24 |
| CG5172 == FBgn0030830        | INC129C04 | 0.13 | 0.30 |
| CG30460 == FBgn0050460       | INC016D07 | 0.13 | 0.49 |
| ldgf4 == FBgn0026415         | INC075E12 | 0.13 | 0.12 |
| CG12750 == FBgn0032678       | INC093F04 | 0.13 | 0.13 |
| CG7008 == FBgn0035121        | INC056H10 | 0.13 | 0.09 |
| ERp60 == FBgn0033663         | INC010B12 | 0.13 | 0.16 |
| CG9740 == FBgn0037669        | INC019A04 | 0.13 | 0.06 |
| msh == FBgn0026252           | INC023F01 | 0.13 | 0.31 |
| CG8309 == FBgn0033902        | INC032B09 | 0.13 | 0.13 |
| CG13067 == FBgn0036589       | INC139E02 | 0.13 | 0.11 |
| CG6370 == FBgn0034277        | INC049D05 | 0.14 | 0.11 |
| CG4656 == FBgn0039055        | INC077B08 | 0.14 | 0.08 |
| Tis11 == FBgn0011837         | INC029E05 | 0.14 | 0.29 |
| CG30011 == FBgn0050011       | INC052D04 | 0.14 | 0.21 |
| ncd == FBgn0002924           | INC091E05 | 0.14 | 0.08 |
| aub == FBgn0000146           | INC048G09 | 0.14 | 0.19 |
| uzip == FBgn0004055          | INC098D07 | 0.14 | 0.11 |
| CG9330 == FBgn0036888        | INC008C09 | 0.14 | 0.18 |
| CG15321 == FBgn0030150       | INC051H03 | 0.14 | 0.29 |
| CG9273 == FBgn0032906        | INC125D12 | 0.14 | 0.17 |
| apt == FBgn0015903           | INC086H09 | 0.14 | 0.18 |
| CG12262 == FBgn0035811       | INC091H03 | 0.14 | 0.09 |

## Table2S\_Sun\_Cline

|                              |           |      |      |
|------------------------------|-----------|------|------|
| gro == FBgn0001139           | INC052F08 | 0.14 | 0.12 |
| CG16753 == FBgn0035393       | INC024H06 | 0.14 | 0.30 |
| Act5C == FBgn0000042         | INC006E02 | 0.14 | 0.36 |
| eIF-4E == FBgn0015218        | INC004A10 | 0.14 | 0.20 |
| Jafrac1 == FBgn0040309       | INC012A04 | 0.14 | 0.60 |
| CG14656 == FBgn0037278       | INC043E02 | 0.14 | 0.33 |
| CG9373 == FBgn0037701        | INC031H12 | 0.14 | 0.30 |
| CG9095 == FBgn0030617        | INC053H03 | 0.14 | 0.15 |
| CG12301 == FBgn0036514       | INC093D03 | 0.14 | 0.39 |
| CG7415 == FBgn0037580        | INC070G09 | 0.14 | 0.17 |
| BcDNA:LD06837 == FBgn0027894 | INC019B10 | 0.14 | 0.27 |
| gro == FBgn0001139           | INC096D04 | 0.14 | 0.13 |
| CG31534 == FBgn0051534       | INC156G08 | 0.14 | 0.21 |
| Spx == FBgn0015818           | INC006H11 | 0.14 | 0.24 |
| CG5674 == FBgn0032656        | INC030F08 | 0.14 | 0.33 |
| Rpn5 == FBgn0028690          | INC052G08 | 0.14 | 0.10 |
| CG4789 == FBgn0030792        | INC022C07 | 0.14 | 0.12 |
| Bap == FBgn0010380           | INC010C07 | 0.14 | 0.10 |
| bs == FBgn0004101            | INC089F07 | 0.14 | 0.07 |
| CG6726 == FBgn0039049        | INC120D09 | 0.15 | 0.16 |
| CG7777 == FBgn0033635        | INC128C01 | 0.15 | 0.12 |
| Acon == FBgn0010100          | INC065H05 | 0.15 | 0.23 |
| Tsp42Ee == FBgn0029506       | INC124F04 | 0.15 | 0.23 |
| CG13908 == FBgn0035178       | INC099H02 | 0.15 | 0.14 |
| Ate1 == FBgn0025720          | INC025E04 | 0.15 | 0.42 |
| hrg == FBgn0015949           | INC024B09 | 0.15 | 0.16 |
| CG7552 == FBgn0038255        | INC135G11 | 0.15 | 0.13 |
| CG10912 == FBgn0034296       | INC020D01 | 0.15 | 0.15 |
| CG12288 == FBgn0032620       | INC048B05 | 0.15 | 0.26 |
| Dcp-1 == FBgn0010501         | INC019E06 | 0.15 | 0.13 |
| CG4453 == FBgn0030762        | INC061A07 | 0.15 | 0.17 |
| RpL1 == FBgn0003279          | INC024D07 | 0.15 | 0.16 |
| bsf == FBgn0032679           | INC093C07 | 0.15 | 0.04 |
| CG9153 == FBgn0035207        | INC072B01 | 0.15 | 0.27 |
| dom == FBgn0020306           | INC052E09 | 0.15 | 0.19 |
| 2-Sep == FBgn0014029         | INC018F08 | 0.15 | 0.17 |
| Bub3 == FBgn0025457          | INC009F08 | 0.15 | 0.14 |
| san == FBgn0024188           | INC127F09 | 0.15 | 0.07 |
| CG4328 == FBgn0036274        | INC008H09 | 0.15 | 0.58 |
| Rrp1 == FBgn0004584          | INC086D11 | 0.15 | 0.07 |
| Act5c == FBgn0000042         | CONv04B15 | 0.15 | 0.24 |
| Dp1 == FBgn0027835           | INC091G11 | 0.15 | 0.17 |
| CG9027 == FBgn0033631        | INC135D08 | 0.15 | 0.12 |
| Dhod == FBgn0000447          | INC062E01 | 0.15 | 0.07 |
| if == FBgn0001250            | INC155C07 | 0.15 | 0.22 |
| FB{}1097 == FBti0020208      | INC070B09 | 0.15 | 0.55 |
| CG6416 == FBgn0035917        | INC151A02 | 0.15 | 0.16 |
| CG4869 == FBgn0039567        | INC114D06 | 0.15 | 0.09 |
| CG1468 == FBgn0030157        | INC012B01 | 0.15 | 0.21 |
| CG2972 == FBgn0030177        | INC048D12 | 0.15 | 0.07 |
| BcDNA:GH12558 == FBgn0028479 | INC033B07 | 0.16 | 0.10 |
| CG12202 == FBgn0031020       | INC155B04 | 0.16 | 0.28 |
| CG4049 == FBgn0034976        | INC003H02 | 0.16 | 0.41 |
| CG9336 == FBgn0032897        | INC111A10 | 0.16 | 0.13 |
| Prosbeta2 == FBgn0023174     | INC080D09 | 0.16 | 0.16 |
| Act5c == FBgn0000042         | CONv04D14 | 0.16 | 0.16 |
| CG2246 == FBgn0039790        | INC117H05 | 0.16 | 0.14 |
| hdc == FBgn0010113           | INC122B01 | 0.16 | 0.08 |
| CG17564 == FBgn0032768       | INC157G09 | 0.16 | 0.24 |
| RpS4 == FBgn0011284          | INC112F08 | 0.16 | 0.13 |
| CG8092 == FBgn0033998        | INC027C03 | 0.16 | 0.07 |
| dah == FBgn0015926           | INC012F05 | 0.16 | 0.16 |
| CG1340 == FBgn0039797        | INC035E11 | 0.16 | 0.51 |

## Table2S\_Sun\_Cline

|                           |           |      |      |
|---------------------------|-----------|------|------|
| CG8314 == FBgn0034057     | INC103D03 | 0.16 | 0.13 |
| fok == FBgn0020303        | INC008E05 | 0.16 | 0.24 |
| Fer2LCH == FBgn0015221    | INC154H07 | 0.16 | 0.16 |
| CG32043 == FBgn0052043    | INC098H11 | 0.16 | 0.26 |
| CG8192 == FBgn0034030     | INC070D03 | 0.16 | 0.26 |
| CG14422 == FBgn0029645    | INC034B09 | 0.16 | 0.16 |
| CG5645 == FBgn0036254     | INC049D07 | 0.16 | 0.32 |
| CG30122 == FBgn0050122    | INC048E07 | 0.16 | 0.20 |
| Mi-2 == FBgn0013591       | INC017G04 | 0.17 | 0.11 |
| CG7675 == FBgn0038610     | INC084H10 | 0.17 | 0.06 |
| CG7741 == FBgn0033615     | INC127F05 | 0.17 | 0.11 |
| CG5651 == FBgn0035946     | INC049F07 | 0.17 | 0.12 |
| CG12785 == FBgn0038410    | INC021A06 | 0.17 | 0.19 |
| tgo == FBgn0015014        | INC073D01 | 0.17 | 0.15 |
| Act5c == FBgn0000042      | CONv04B23 | 0.17 | 0.20 |
| CG30149 == FBgn0050149    | INC101A06 | 0.17 | 0.17 |
| TER94 == FBgn0024923      | INC008F03 | 0.17 | 0.22 |
| Act5c == FBgn0000042      | CONv04B21 | 0.17 | 0.19 |
| CG10754 == FBgn0036314    | INC008F02 | 0.17 | 0.16 |
| GstS1 == FBgn0010226      | INC106F04 | 0.17 | 0.19 |
| Sip1 == FBgn0010620       | INC069F07 | 0.17 | 0.12 |
| CG3605 == FBgn0031493     | INC086C03 | 0.17 | 0.17 |
| CG16772 == FBgn0032835    | INC093A09 | 0.17 | 0.17 |
| sano == FBgn0034408       | INC009A03 | 0.17 | 0.61 |
| Act5c == FBgn0000042      | CONv04B16 | 0.17 | 0.16 |
| Arp53D == FBgn0011743     | INC087D01 | 0.17 | 0.14 |
| AP-2sigma == FBgn0043012  | INC149G02 | 0.17 | 0.22 |
| CG14322 == FBgn0038532    | INC032E03 | 0.17 | 0.11 |
| mod == FBgn0002780        | INC097A09 | 0.18 | 0.18 |
| Act5c == FBgn0000042      | CONv04C13 | 0.18 | 0.16 |
| CG5684 == FBgn0036239     | INC015F10 | 0.18 | 0.23 |
| CG8036 == FBgn0037607     | INC043B09 | 0.18 | 0.17 |
| CG31224 == FBgn0051224    | INC069D05 | 0.18 | 0.12 |
| Pros26 == FBgn0002284     | INC051C06 | 0.18 | 0.15 |
| Sap-r == FBgn0000416      | INC112G07 | 0.18 | 0.17 |
| CG15566 == FBgn0039842    | INC113G04 | 0.18 | 0.20 |
| CG11513 == FBgn0035448    | INC067A05 | 0.18 | 0.21 |
| rols == FBgn0041096       | INC124E01 | 0.18 | 1.34 |
| Act5c == FBgn0000042      | CONv04A21 | 0.18 | 0.17 |
| Act79B == FBgn0000045     | INC156D03 | 0.18 | 0.19 |
| Mhcl == FBgn0026059       | INC051A12 | 0.18 | 0.29 |
| CG12912 == FBgn0033497    | INC114B09 | 0.18 | 0.36 |
| EG:52C10.1 == FBgn0028744 | INC074E12 | 0.18 | 0.16 |
| Act5c == FBgn0000042      | CONv04A14 | 0.18 | 0.36 |
| Hel25E == FBgn0014189     | INC111G07 | 0.18 | 0.11 |
| CT22657                   | INC070D06 | 0.18 | 0.14 |
| CG12203 == FBgn0031021    | INC116C03 | 0.18 | 0.13 |
| CG5484 == FBgn0039450     | INC117A08 | 0.18 | 0.11 |
| Gasp == FBgn0026077       | INC157A03 | 0.18 | 0.16 |
| glob1 == FBgn0027657      | INC059B11 | 0.18 | 0.09 |
| mfas == FBgn0024211       | INC096G07 | 0.18 | 0.09 |
| Dbi == FBgn0010387        | INC109E07 | 0.18 | 0.19 |
| Act5c == FBgn0000042      | CONv04A19 | 0.18 | 0.31 |
| CG8012 == FBgn0040832     | INC021H05 | 0.19 | 0.20 |
| Act5c == FBgn0000042      | CONv04C23 | 0.19 | 0.24 |
| Act5c == FBgn0000042      | CONv04C15 | 0.19 | 0.27 |
| Act5c == FBgn0000042      | CONv04B24 | 0.19 | 0.39 |
| CG2807 == FBgn0031266     | INC064A09 | 0.19 | 0.21 |
| Act5c == FBgn0000042      | CONv04C22 | 0.19 | 0.17 |
| wupA == FBgn0004028       | INC133G06 | 0.19 | 0.14 |
| CG32542 == FBgn0052542    | INC064F07 | 0.19 | 0.68 |
| Act5c == FBgn0000042      | CONv04B14 | 0.19 | 0.17 |
| Act5c == FBgn0000042      | CONv04D21 | 0.19 | 0.20 |

## Table2S\_Sun\_Cline

|                              |           |      |      |
|------------------------------|-----------|------|------|
| Abi == FBgn0020510           | INC062G09 | 0.19 | 0.22 |
| Ibl == FBgn0008651           | INC101E01 | 0.19 | 0.19 |
| CG13624 == FBgn0039209       | INC081E07 | 0.19 | 0.27 |
| CG3278 == FBgn0032988        | INC013C03 | 0.19 | 0.20 |
| eIF-5C == FBgn0037346        | INC115A10 | 0.19 | 0.09 |
| Khc-73 == FBgn0019968        | INC070D12 | 0.19 | 0.23 |
| cora == FBgn0010434          | INC008H03 | 0.20 | 0.19 |
| I(3)07882 == FBgn0010926     | INC063H08 | 0.20 | 0.11 |
| ND42 == FBgn0019957          | INC077A03 | 0.20 | 0.23 |
| mfas == FBgn0024211          | INC053E02 | 0.20 | 0.17 |
| CG30118 == FBgn0050118       | INC085E05 | 0.20 | 0.34 |
| CG6619 == FBgn0035676        | INC105E04 | 0.20 | 0.25 |
| Act5c == FBgn0000042         | CONv04D19 | 0.20 | 0.18 |
| Act5c == FBgn0000042         | CONv04D18 | 0.20 | 0.19 |
| svp == FBgn0003651           | INC002E05 | 0.20 | 0.42 |
| CG6778 == FBgn0036477        | INC097G07 | 0.20 | 0.09 |
| Act5c == FBgn0000042         | CONv04C17 | 0.20 | 0.12 |
| Act5c == FBgn0000042         | CONv04A16 | 0.20 | 0.25 |
| sca == FBgn0003326           | INC095G07 | 0.20 | 0.22 |
| msb1l == FBgn0027949         | INC022E12 | 0.20 | 0.30 |
| Act5c == FBgn0000042         | CONv04B13 | 0.21 | 0.24 |
| Imp == FBgn0030235           | INC071A08 | 0.21 | 0.06 |
| glu == FBgn0015391           | INC090H08 | 0.21 | 0.10 |
| Act5c == FBgn0000042         | CONv04C24 | 0.21 | 0.16 |
| hyd == FBgn0002431           | INC012H09 | 0.21 | 0.13 |
| CG33071 == FBgn0053071       | INC113E10 | 0.21 | 0.18 |
| Act5c == FBgn0000042         | CONv04C18 | 0.21 | 0.21 |
| Mcm2 == FBgn0014861          | INC016C07 | 0.21 | 0.26 |
| Ogt == FBgn0040295           | INC006H09 | 0.21 | 0.22 |
| CG10555 == FBgn0030034       | INC022C05 | 0.21 | 0.18 |
| CG8552 == FBgn0031990        | INC065G09 | 0.21 | 0.14 |
| CG32549 == FBgn0052549       | INC108B12 | 0.21 | 0.24 |
| Act5c == FBgn0000042         | CONv04B18 | 0.22 | 0.15 |
| Cen190 == FBgn0000283        | INC080H10 | 0.22 | 0.26 |
| miple2 == FBgn0029002        | INC095A07 | 0.22 | 0.10 |
| Act5c == FBgn0000042         | CONv04B19 | 0.22 | 0.13 |
| CG7443 == FBgn0037577        | INC128B10 | 0.22 | 0.14 |
| Act5c == FBgn0000042         | CONv04C14 | 0.22 | 0.33 |
| CG16711 == FBgn0036032       | INC072B12 | 0.22 | 0.68 |
| Prx2540-2 == FBgn0033518     | INC143B10 | 0.22 | 0.06 |
| BcDNA:GH02678 == FBgn0027605 | INC101H09 | 0.22 | 0.11 |
| Gp150 == FBgn0013272         | INC103D12 | 0.22 | 0.10 |
| Mdh == FBgn0029155           | INC147H04 | 0.22 | 0.17 |
| BcDNA:GH05536 == FBgn0027586 | INC107D11 | 0.22 | 0.11 |
| Gbp == FBgn0013969           | INC100H07 | 0.22 | 0.24 |
| Gasp == FBgn0026077          | INC089C10 | 0.22 | 0.17 |
| CG31739 == FBgn0051739       | INC065D05 | 0.22 | 0.12 |
| Trap18 == FBgn0037262        | INC077B06 | 0.22 | 0.12 |
| Act5c == FBgn0000042         | CONv04D13 | 0.23 | 0.21 |
| Act5c == FBgn0000042         | CONv04D16 | 0.23 | 0.14 |
| CG8600 == FBgn0035765        | INC125G07 | 0.23 | 0.17 |
| CG6632 == FBgn0030945        | INC042B08 | 0.23 | 0.22 |
| CG12316 == FBgn0036483       | INC051E01 | 0.23 | 0.34 |
| Act87E == FBgn0000046        | INC153F05 | 0.23 | 0.17 |
| Act5c == FBgn0000042         | CONv04A17 | 0.23 | 0.11 |
| CG3008 == FBgn0031643        | INC062C07 | 0.23 | 0.05 |
| Act5c == FBgn0000042         | CONv04D22 | 0.23 | 0.34 |
| Act5c == FBgn0000042         | CONv04A20 | 0.23 | 0.18 |
| CG11522 == FBgn0039857       | INC016B07 | 0.23 | 0.40 |
| CG7294 == FBgn0032284        | INC037B06 | 0.23 | 0.34 |
| Fas1 == FBgn0000634          | INC131B08 | 0.23 | 0.13 |
| Act5c == FBgn0000042         | CONv04D20 | 0.23 | 0.19 |
| CG11816 == FBgn0030495       | INC031C09 | 0.23 | 0.20 |

## Table2S\_Sun\_Cline

|                             |           |      |      |
|-----------------------------|-----------|------|------|
| alphaTub85E == FBgn0003886  | INC036F11 | 0.24 | 0.23 |
| Act5c == FBgn0000042        | CONv04D15 | 0.24 | 0.19 |
| betaTub56D == FBgn0003887   | INC119E10 | 0.24 | 0.08 |
| AttA == FBgn0012042         | INC112H07 | 0.24 | 0.18 |
| Act5c == FBgn0000042        | CONv04C21 | 0.24 | 0.16 |
| Chd64 == FBgn0035499        | INC113B11 | 0.24 | 0.11 |
| Act5c == FBgn0000042        | CONv04A18 | 0.24 | 0.20 |
| Act42A == FBgn0000043       | INC111H10 | 0.25 | 0.06 |
| piwi == FBgn0004872         | INC047G01 | 0.25 | 0.09 |
| Act5c == FBgn0000042        | CONv04B17 | 0.25 | 0.17 |
| CG7338 == FBgn0037073       | INC069E09 | 0.25 | 0.17 |
| CG8444 == FBgn0037671       | INC024D08 | 0.25 | 0.49 |
| Ca-P60A == FBgn0004551      | INC055G01 | 0.25 | 0.09 |
| Ef1alpha48D == FBgn0000556  | INC038D09 | 0.25 | 0.28 |
| rut == FBgn0003301          | INC015A06 | 0.25 | 0.35 |
| Anxb11 == FBgn0030749       | INC014H09 | 0.25 | 0.49 |
| CG15707 == FBgn0034098      | INC029D02 | 0.25 | 0.24 |
| CG7010 == FBgn0029721       | INC121H09 | 0.26 | 0.18 |
| Act5c == FBgn0000042        | CONv04B22 | 0.26 | 0.18 |
| CG5177 == FBgn0031908       | INC115H12 | 0.26 | 0.14 |
| CG5787 == FBgn0032454       | INC100B09 | 0.26 | 0.13 |
| jbug == FBgn0028371         | INC025B11 | 0.26 | 0.19 |
| Prosbeta3 == FBgn0026380    | INC023F07 | 0.26 | 0.20 |
| Awh == FBgn0013751          | INC140F04 | 0.26 | 0.24 |
| CG6554 == FBgn0037834       | INC091B10 | 0.26 | 0.16 |
| Act5c == FBgn0000042        | CONv04C20 | 0.26 | 0.18 |
| Act5c == FBgn0000042        | CONv04D17 | 0.26 | 0.22 |
| CG13900 == FBgn0035162      | INC088C02 | 0.26 | 0.18 |
| CG11508 == FBgn0033267      | INC048F03 | 0.26 | 0.15 |
| BEST:GH15083 == FBgn0045823 | INC071G09 | 0.27 | 0.19 |
| Act5c == FBgn0000042        | CONv04B20 | 0.27 | 0.19 |
| CG1572 == FBgn0030309       | INC006E09 | 0.27 | 0.18 |
| Mcm10 == FBgn0032929        | INC065H06 | 0.27 | 0.04 |
| vkgl == FBgn0016075         | INC122B03 | 0.27 | 0.15 |
| CG32062 == FBgn0052062      | INC016F08 | 0.28 | 0.72 |
| TpnC73F == FBgn0010424      | INC127A12 | 0.28 | 0.29 |
| CG32165 == FBgn0042178      | INC090B11 | 0.28 | 0.12 |
| TpnC47D == FBgn0010423      | INC144F07 | 0.28 | 0.20 |
| Ugt58Fa == FBgn0040091      | INC051D02 | 0.28 | 0.06 |
| CG11134 == FBgn0030518      | INC014H11 | 0.29 | 0.11 |
| Ef1alpha100E == FBgn0000557 | INC020H08 | 0.29 | 0.23 |
| pyd == FBgn0003177          | INC062A10 | 0.30 | 0.20 |
| I(2)01424 == FBgn0010488    | INC051B09 | 0.30 | 0.37 |
| CG14213 == FBgn0031047      | INC008D08 | 0.30 | 0.17 |
| CG16970 == FBgn0032504      | INC026D02 | 0.30 | 0.08 |
| CG11856 == FBgn0039302      | INC082E09 | 0.30 | 0.16 |
| LanB2 == FBgn0002528        | INC076C09 | 0.30 | 0.17 |
| Act5c == FBgn0000042        | CONv04C16 | 0.31 | 0.20 |
| Nup154 == FBgn0021761       | INC029F09 | 0.31 | 0.18 |
| Cyp4g1 == FBgn0010019       | INC102A07 | 0.33 | 0.10 |
| CG13185 == FBgn0033661      | INC026D03 | 0.33 | 0.07 |
| Mhc == FBgn0002741          | INC064G12 | 0.34 | 0.12 |
| CG12819 == FBgn0037810      | INC127G05 | 0.34 | 0.13 |
| CG5931 == FBgn0036548       | INC032A10 | 0.34 | 0.05 |
| EG:8D8.6 == FBgn0024362     | INC141G08 | 0.35 | 0.54 |
| CG3262 == FBgn0032986       | INC092G03 | 0.36 | 0.15 |
| emp == FBgn0010435          | INC030D09 | 0.38 | 0.17 |
| Act57B == FBgn0000044       | INC139F07 | 0.43 | 0.27 |
| CG18178 == FBgn0036035      | INC081F06 | 0.43 | 0.22 |
| LanA == FBgn0002526         | INC086D06 | 0.53 | 0.35 |
